# Supplementary material for: Wave-shaped polycyclic hydrocarbons with controlled aromaticity
Source: PubMed Central journal article supplement — Chem Sci. 2019 Feb 28;10(14):4025–31. doi: 10.1039/c8sc05416a (PMC6499110; doi:10.1039/c8sc05416a), 2019-02-28
Supplement: SC-010-C8SC05416A-s001.pdf [file SC-010-C8SC05416A-s001.pdf]

*Supplemental Information*

## Wavy-shaped Polycyclic Hydrocarbons with Controlled Aromaticity

Ji Ma,<sup>a</sup> Ke Zhang,<sup>b</sup> Karl Sebastian Schellhammer,<sup>c</sup> Yubin Fu,<sup>a</sup> Hartmut Komber,<sup>d</sup> Chi Xu,<sup>e</sup> Alexey A. Popov,<sup>f</sup> Felix Hennesdorf,<sup>g</sup> Jan J. Weigand,<sup>g</sup> Shengqiang Zhou,<sup>e</sup> Wojciech Pisula,<sup>b,h</sup> Frank Ortmann,<sup>c</sup> Reinhard Berger,<sup>a</sup> Junzhi Liu,<sup>a,\*</sup> and Xinliang Feng<sup>a,\*</sup>

<sup>a</sup>Faculty of Chemistry and Food Chemistry, Technische Universität Dresden, Dresden 01062, Germany.

E-mail: junzhi.liu@tu-dresden.de; xinliang.feng@tu-dresden.de.

<sup>b</sup>Max Planck institute for Polymer Research, Ackermannweg 10, Mainz 55128, Germany.

<sup>c</sup>Center for Advancing Electronics Dresden (cfaed), Technische Universität Dresden, Dresden 01062, Germany.

<sup>d</sup>Leibniz-Institut für Polymerforschung Dresden e. V. Hohe Straße 6, Dresden 01069, Germany.

<sup>e</sup>Helmholtz-Zentrum Dresden-Rossendorf, Institute of Ion Beam Physics and Materials Research, Bautzner Landstrasse 400, Dresden 01328, Germany

<sup>f</sup>Leibniz Institute for Solid State and Materials Research, Dresden 01069, Germany.

<sup>g</sup>Chair of Inorganic Molecular Chemistry, Technische Universität Dresden, Dresden 01062, Germany.

<sup>h</sup>Department of Molecular Physics, Lodz University of Technology, Zeromskiego 116, Lodz 90-924, Poland.

### Table of Contents

1. Experimental Procedures
  - 1.1 General methods and materials
  - 1.2 Detailed synthetic procedure and characterization data
2. HR MALDI-TOF MS for **1** and **2**
3. NMR spectra of **1** and **2**
4. Variable-temperature EPR measurements of **2**
5. Time-dependent UV/Vis spectra of **1** and **2**
6. X-ray crystallographic analysis of **2** and **9**
7. DFT calculations
8. OFET fabrication and measurement
9. NMR spectra
10. High resolution mass spectra
11. Elemental analysis
12. References

## 1. Experimental Procedures

### 1.1 General methods and materials

$^1\text{H}$  (500.13 MHz) and  $^{13}\text{C}$  (125.77 MHz) nuclear magnetic resonance (NMR) spectra were recorded on a Bruker Avance III 500 spectrometer using a 5 mm  $^1\text{H}/^{13}\text{C}/^{19}\text{F}/^{31}\text{P}$  gradient probe.  $\text{CD}_2\text{Cl}_2$  ( $\delta(^1\text{H}) = 5.33$  ppm,  $\delta(^{13}\text{C}) = 53.7$  ppm),  $\text{CDCl}_3$  ( $\delta(^1\text{H}) = 7.26$  ppm,  $\delta(^{13}\text{C}) = 77.0$  ppm) or  $\text{C}_2\text{D}_2\text{Cl}_4$  ( $\delta(^1\text{H}) = 5.98$  ppm,  $\delta(^{13}\text{C}) = 73.7$  ppm) were used as solvent, lock and internal standard. The 2D NMR spectra were recorded using the standard pulse sequences of the Bruker software package (TOPSPIN 3.2). The sample temperature was controlled by the Bruker variable temperature accessory BVT-3000. The mass spectrometry analysis was performed on a Bruker Autoflex Speed MALDI TOF MS (Bruker Daltonics, Bremen, Germany) using dithranol as matrix. High-resolution ESI mass spectra were recorded in the positive mode with a Finnigan LTQ-FT from Fisher Thermo Scientific. Elemental analysis (EA) was carried out using an Euro EA 3000 CHNS-O Elemental Analyzer from Eurovector Instruments & Software (Italy). UV/visible (UV/Vis) spectra were measured on an Agilent Cary 5000 UV-VIS-NIR spectrophotometer by using 10 mm optical-path quartz cell at room temperature. Electron paramagnetic resonance (EPR) spectra were recorded in the solid form by using a Bruker X-band spectrometer ESP300 E, equipped with an NMR gauss meter (Bruker ER035), a frequency counter (Bruker ER 041 XK) and a variable temperature control continuous flow  $\text{N}_2$  cryostat (Bruker B-VT 2000). The temperature dependent magnetization measurement was assessed using a SQUID-VSM (Superconducting Quantum Interference Device - Vibrating Sample Magnetometer, Quantum Design, Inc.). Powder sample with a weight of 5~10 mg was sealed in a plastic capsule. Magnetic moment was measured in the temperature range of 5 to 400 K. Bleaney-Bowers equation was used to fit the  $\chi T-T$  plot. Cyclic voltammetry (CV) measurements were carried out on a CHI 760 E potentiostat (CH Instruments, USA) in a three-electrode cell in a dichloromethane solution of  $n\text{Bu}_4\text{NPF}_6$  (0.1 M) with a scan rate of 50 mV/s at room temperature. A Pt wire, Ag/AgCl (3M KCl solution), and a glassy carbon electrode were used as the counter electrode, the reference electrode, and the working electrode, respectively. 11,11'-Dibromo-5,5'-bichrysene (**3**),<sup>[1]</sup> 2,5-dibromoterephthalaldehyde (**5**)<sup>[2]</sup> and 4,6-dibromoisophthalaldehyde (**10**)<sup>[3]</sup> were synthesized according to the literature.

### 1.2 Detailed synthetic procedure and characterization data

#### 9,18-Dibromobenzo[*a*]dinaphtho[2,1,8-*cde*:1',2',3',4'-*ghl*]perylene (**4**)

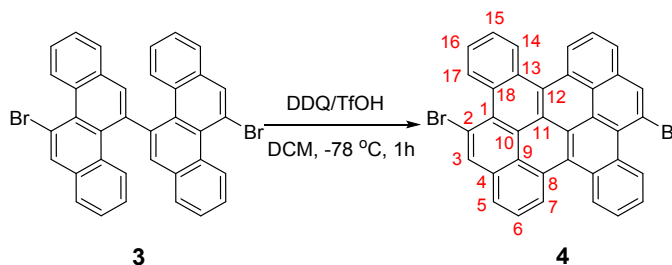

To a mixture of 11,11'-dibromo-5,5'-bichrysene (**3**) (50 mg, 0.08 mmol) and 2,3-dichloro-5,6-dicyano-1,4-benzoquinone (DDQ) (41 mg, 0.18 mmol) in dry dichloromethane (DCM) (9.5 mL) at -78 °C was added trifluoromethanesulfonic acid (0.5 mL). After 1 h, the resulting mixture was quenched by triethylamine and was concentrated under reduced pressure, then the residue was dispersed in methanol. The solid was filtered, washed with methanol to afford 35 mg (72%) of compound **4** as a red solid.  $^1\text{H}$  NMR (500 MHz,  $\text{C}_2\text{D}_2\text{Cl}_4$ ):  $\delta$  9.75 (d, 8.3 Hz, 2H; 17), 8.92 (d, 8.0 Hz, 2H; 14), 8.77 (d, 7.5 Hz, 2H; 7), 8.55 (s, 2H; 3), 8.03 (d, 7.7 Hz, 2H; 5), 7.95 (t, 7.7 Hz, 2H; 6), 7.73 (t, 8.0 Hz, 2H; 15), 7.69 ppm (t, 8.2 Hz, 2H; 16).  $^{13}\text{C}$  NMR (125 MHz,  $\text{C}_2\text{D}_2\text{Cl}_4$ ):  $\delta$  134.0 (3), 132.0 (4), 128.7 (18), 128.6 (8), 128.5 (13), 128.4 (7), 127.5 (15), 127.0 (14), 126.8 (17), 126.7 (6), 125.4 (5), 124.8 (1), 124.5 (10 or 11), 124.2 (12), 124.1 (9), 124.0 (16), 123.9 (10 or 11), 117.9 ppm (2). HR-MS (MALDI):

$m/z = 605.9618$ , calcd. for  $C_{36}H_{16}Br_2$  ( $[M]^+$ ):  $m/z = 605.9619$ , error =  $-0.1$  ppm. EA calculated for  $C_{36}H_{16}Br_2$ : C 71.08%, H 2.65%, found: C 70.04%, H 2.43%.

#### 4-Bromo-4'-(*tert*-butyl)-[1,1'-biphenyl]-2,5-dicarbaldehyde (**6**)

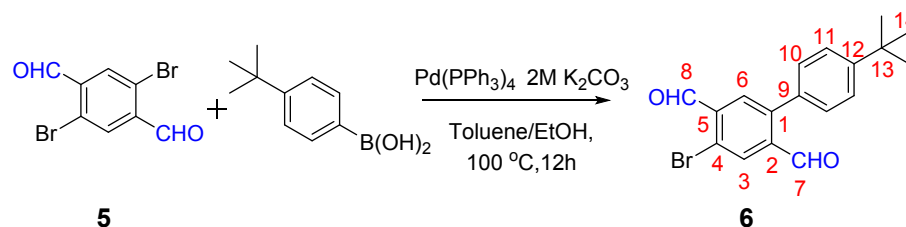

A suspension of compound **5** (4.8 g, 16.44 mmol), (4-(*tert*-butyl)phenyl)boronic acid (1.46 g, 8.22 mmol),  $Pd(PPh_3)_4$  (190 mg, 0.16 mmol) and 2M aqueous solution of  $K_2CO_3$  (8 mL) in toluene (60 mL) and EtOH (8 mL) was degassed by three freeze–pump–thaw cycles. The reaction mixture was heated at 100 °C overnight under argon. After cooling to room temperature, the mixture was extracted with DCM and washed with water. The organic layer was dried over anhydrous  $MgSO_4$ . The solvent was removed under vacuum and the residue was purified by silica gel column chromatography using DCM/hexane (3/1, v/v) as eluent to give the crude product as a yellow solid then recrystallization with chloroform for two times to get compound **6** (1.85 g) as a white solid in 65% yield.  $^1H$  NMR (500 MHz,  $CD_2Cl_2$ ):  $\delta$  10.43 (s, 1H; 8), 9.96 (s, 1H; 7), 8.22 (s, 1H; 3), 7.97 (s, 1H; 6), 7.54 (d, 8.4 Hz, 2H; 11), 7.33 (d, 8.4 Hz, 2H; 10), 1.37 ppm (s, 9H; 14).  $^{13}C$  NMR (125 MHz,  $CD_2Cl_2$ ):  $\delta$  191.3 (8), 190.8 (7), 152.3 (12), 145.1 (1), 138.2 (2), 136.4 (5), 133.2 (3), 133.0 (9), 132.5 (6), 129.9 (10), 126.1 (11), 125.3 (4), 35.0 (13), 31.3 ppm (14). HR-MS (ESI):  $m/z = 344.0407$ , calcd. for  $C_{18}H_{17}BrO_2$  ( $[M]^+$ ):  $m/z = 344.0412$ , error =  $-1.51$  ppm.

#### 4'-(*tert*-Butyl)-4-(4,4,5,5-tetramethyl-1,3,2-dioxaborolan-2-yl)-[1,1'-biphenyl]-2,5-dicarbaldehyde (**7**):

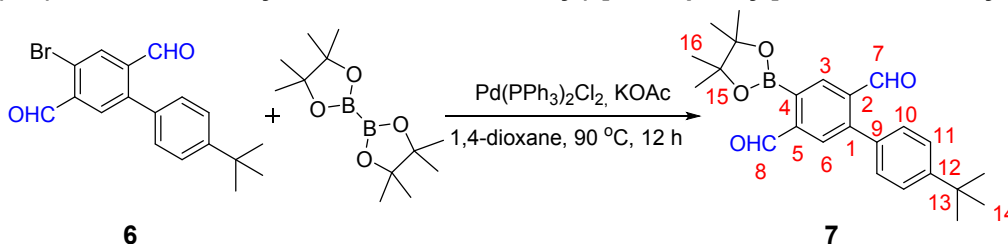

Compound **6** (300 mg, 0.87 mmol), bis(pinacolato)diboron (441 mg, 1.74 mmol),  $Pd(PPh_3)_2Cl_2$  (30 mg, 0.045 mmol), KOAc (170 mg, 1.74 mmol) and dry 1,4-dioxane (10 mL) were added to a Schlenk flask equipped with a magnetic stirrer. The reaction mixture was purged with argon by 30 min and then stirred at 90 °C for 20 h. After cooling to room temperature, the mixture was diluted with ethyl acetate and washed with water and brine before drying with  $MgSO_4$ . The solvent was removed under reduced pressure and the residue was purified by short column chromatography over silica gel (ethyl acetate) to give compound **7** (341 mg, 91%) as a white waxy solid.  $^1H$  NMR (500 MHz,  $CDCl_3$ ):  $\delta$  10.67 (s, 1H; 8), 10.08 (s, 1H; 7), 8.50 (s, 1H; 3), 8.05 (s, 1H; 6), 7.52 (d, 8.4 Hz, 2H; 11), 7.3 (d, 8.4 Hz, 2H; 10), 1.41 (s, 12H; 16), 1.38 ppm (s, 9H; 14).  $^{13}C$  NMR (125 MHz,  $CDCl_3$ ):  $\delta$  194.08 (8), 192.16 (7), 152.06 (12), 147.62 (1), 144.11 (5), 136.04 (2), 135.63 (3), 133.66 (9), 130.8 (very br; 4; identified by HMBC correlation to  $H_6$ ), 129.98 (6), 129.78 (10), 125.68 (11), 84.78 (15), 34.75 (13), 31.29 (14), 24.90 ppm (16). HR-MS (ESI):  $m/z = 391.2193$ , calcd. for  $C_{24}H_{29}BO_4$  ( $[M]^+$ ):  $m/z = 391.2195$ , error =  $-0.45$  ppm.

**4,4''-(Benzo[a]dinaphtho[2,1,8-cde:1',2',3',4'-ghi]perylene-9,18-diyl)bis(4'-(tert-butyl)-[1,1'-biphenyl]-2,5-dicarbaldehyde) (8)**

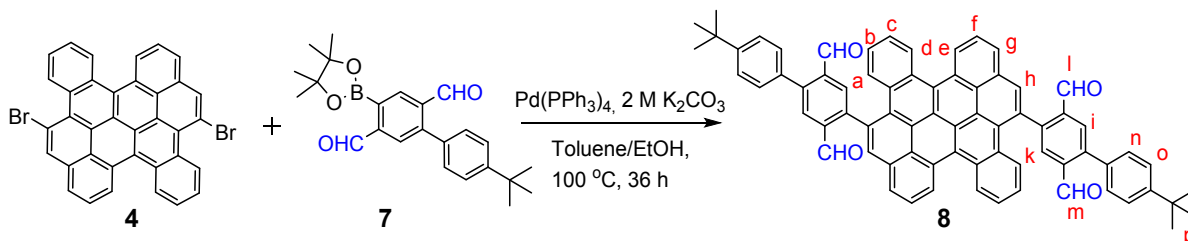

In a two-necked round-bottom flask equipped with a condenser, a mixture of compound **4** (100 mg, 0.16 mmol) and compound **7** (258 mg, 0.66 mmol) in toluene (15 mL), 2 M aqueous solution of  $K_2CO_3$  (1.5 mL) and EtOH (1.5 mL) was degassed with argon for 30 minutes. Then,  $Pd(PPh_3)_4$  (19 mg, 0.16 mmol) was added. After deoxygenation by three “freeze-pump-thaw” cycles, the reaction mixture was heated to 100 °C for 36 h under argon. After cooling to room temperature, the reaction solvent was removed under vacuum and the residue was purified by silica gel column chromatography using EtOAc/hexane (1/4, v/v) as eluent to obtain the title compound **8** (98 mg, 61%) as an orange solid. Final purification was done by recycling gel permeation chromatography using  $CHCl_3$  as the eluent.  $^1H$  NMR (500 MHz,  $C_2D_2Cl_4$ , 120 °C):  $\delta$  10.30 (br, 2H; m), 10.08 and 9.87 (br, 2H; l), 9.28 (d, 8.5 Hz, 2H; d), 9.16 (d, 7.8 Hz, 2H; e), 8.52 and 8.41 (br, 2H; h, i or k), 8.8-8.25 (6H; h, i or k and g), 8.25 8.1 (2H; a, f), 7.73 (t, 7.8 Hz, 2H; b), 7.68 (d, 8.0 Hz, 4H; o), 7.60 (d, 8.0 Hz, 4H; n), 7.40 (t, 7.8 Hz, 2H; c), 1.44 ppm (s, 18H; p).  $^{13}C$  NMR (125 MHz,  $C_2D_2Cl_4$ , 30 °C):  $\delta$  192.2, 191.3, 191.0 (all CHO), 152.0, 146.4, 146.3, 144.9, 144.8, 137.4, 137.2, 136.2, 136.0, 133.3, 133.0, 132.5, 132.4, 131.1, 131.0, 130.6, 130.5, 130.2, 129.8, 129.3, 129.2, 129.1, 128.9, 128.6, 128.4, 128.0, 127.9, 127.6, 127.0, 126.8, 126.7, 126.5, 126.2, 126.0, 125.9, 125.7, 125.3, 124.9, 124.7, 124.6, 124.4, 123.9, 123.7, 34.5 ( $C_{tBu}$ ), 31.2 ppm ( $CH_3$ ). HR-MS (MALDI):  $m/z$  = 978.3702, calcd. for  $C_{72}H_{50}O_4$  ( $[M]^+$ ):  $m/z$  = 978.3709, error = -0.7 ppm. EA calculated for  $C_{72}H_{50}O_4$ : C 88.32%, H 5.15%, found: C 88.01%, H 5.45%.

**5,20-Di-tert-butyl-1,7,16,22-tetramesityl-1,7,16,22-tetrahydrobenzo[a]benzo[5,6]-s-indaceno[1,2-k]benzo[5',6']-s-indaceno[1',2':3,4]naphtho[2,1,8-cde]naphtho[1,2,3,4-ghi]perylene (9)**

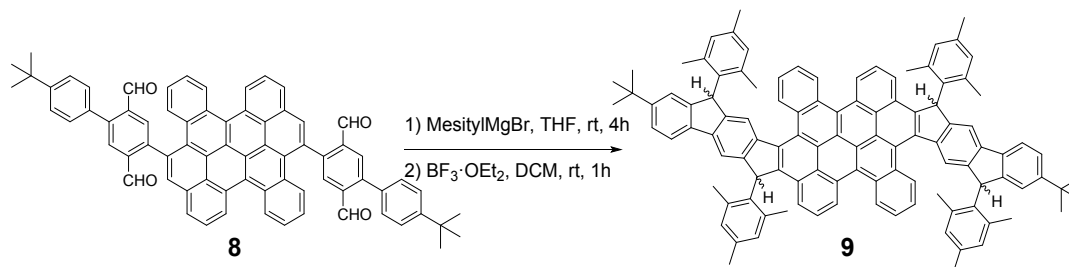

Compound **8** (30 mg, 0.03 mmol) was dissolved in 15 mL of dry THF under argon atmosphere. To the solution was added 0.6 mL mesitylmagnesium bromide solution (1M in THF, 0.6 mmol) and the mixture was stirred at room temperature for 4 hours. The reaction mixture was then poured into 30 mL water and extracted by chloroform. The organic layer was dried over  $MgSO_4$  and the solvent was removed under reduced pressure. The residue was then redissolved in 30 mL dry DCM under argon atmosphere and 1 mL of  $BF_3 \cdot OEt_2$  was added. The mixture was stirred for 1 h and then washed with  $NaHCO_3$  solution (3x20 mL) and water (3x20 mL). The organic layer was dried over  $MgSO_4$  and the solvent was removed under reduced pressure. The residue was purified by column chromatography (silica gel, n-hexane/DCM (1/1, v/v)) to give compound **9** as a red solid (36 mg, 87% in two steps). The  $^1H$  NMR spectrum of compound **9** is very complex. VT measurements (-50 °C – 120 °C) reveal internal motions by line narrowing and line broadening effects. Signals of different intensity point to minor and

major isomers.  $^1\text{H}$  NMR (500 MHz,  $\text{C}_2\text{D}_2\text{Cl}_4$ ,  $120^\circ\text{C}$ ): selected signals  $\delta$  9.25, 9.10, 8.35, 8.00, 7.89, 7.76, 7.45, 7.31, 7.08, 6.81, 6.67, 6.31, 5.72, 5.64, 3.15, 2.79, 2.73, 2.42, 2.31, 1.37 ppm.  $^{13}\text{C}$  NMR (125 MHz,  $\text{C}_2\text{D}_2\text{Cl}_4$ ,  $30^\circ\text{C}$ ): selected signals 150.5, 147.8, 139.9, 137.8, 136.0, 135.5, 130.7, 130.2, 129.2, 128.7, 127.1, 123.8, 121.0, 119.6, 114.8, 50.2, 49.6, 34.7, 31.4, 22.5, 22.3, 21.7, 21.1, 20.9, 18.5 ppm. HR-MS (MALDI):  $m/z = 1386.7039$ , calcd. for  $\text{C}_{108}\text{H}_{90}$  ( $[\text{M}]^+$ ):  $m/z = 1386.7043$ , error = -0.2 ppm. EA calculated for  $\text{C}_{108}\text{H}_{90}$ : C 93.46%, H 6.54%, found: C 93.21%, H 6.75%.

**5,20-Di-*tert*-butyl-1,7,16,22-tetramesitylbenzo[*a*]benzo[5,6]-*s*-indaceno[1,2-*k*]benzo[5',6']-*s*-indaceno[1',2':3,4]naphtho[2,1,8-*cde*]naphtho[1,2,3,4-*ghi*]perylene (1)**

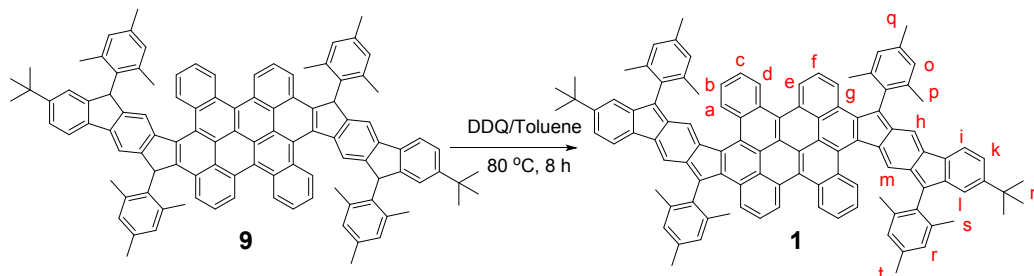

To a 25 mL flask with a stir bar was added **9** (30 mg, 0.02 mmol) and dry toluene (10 mL). The mixture was degassed by three freeze-thaw cycles and then brought to  $80^\circ\text{C}$ . Then, DDQ (36 mg) in toluene (1.8 mL) was added dropwise via a syringe. After stirring for 8 hours, the reaction was cooled down. After evaporation of the solvent, the residue was purified by column chromatography (n-hexane/DCM = 1/1) to yield compound **1** as a dark-brown coloured solid (23 mg, 76 %).  $^1\text{H}$  NMR (500 MHz,  $\text{C}_2\text{D}_2\text{Cl}_4$ ):  $\delta$  9.52 (d, 8.0 Hz, 2H; a), 8.92 (d, 8.0 Hz, 2H; d), 8.76 (d, 7.5 Hz, 2H; e), 7.75 (s, 2H; m), 7.61 (t, 7.5 Hz, 2H; c), 7.57 (t, 8.0 Hz, 2H; f), 7.47 (d, 8.4 Hz, 2H; g), 7.43 (t, 7.6 Hz, 2H; b), 7.18 (d, 7.8 Hz, 2H; i), 7.14 (s, 4H; o or r) 7.00 (s, 4H; o or r), 6.99 (d, 7.8 Hz, 2H; k), 6.66 (4H; h and l), 2.52 (s, 6H; q or t) 2.39 (s, 6H; q or t) 2.31 (br, 24H; p and s) 1.21 ppm (s, 18H; n). At  $120^\circ\text{C}$  line broadening is observed for several signals of the core whereas the signals of the mesitylene groups become narrower and the broad signal of the methyl groups p and s results in two signals at 2.37 and 2.33 ppm, respectively.  $^{13}\text{C}$  NMR (125 MHz,  $\text{C}_2\text{D}_2\text{Cl}_4$ ):  $\delta$  150.9 ( $\text{C}_{\text{ar}}$  ipso to tBu), 149.6, 146.1, 143.9, 139.9, 137.4 and 137.2 ( $\text{C}_{\text{ar}}$  ipso to q / t), 136.8, 136.3, 135.6, 132.6, 129.5, 128.9, 128.7, 128.1 (o or r), 128.0 (a and o or r), 127.3 (c and d), 126.9 (e), 126.2 (f), 125.7, 125.4 (m), 125.2, 124.9 (k), 123.7 (b), 123.4, 121.4 (g), 120.1 (h or l), 119.9 (i), 118.9 (h or l), 34.4 (C of tBu), 31.0 (n), 21.3 and 21.2 (q and t), 20.8 and 20.5 ppm (p and s). Due to broad signals only few correlations could be observed in the HMBC spectrum. Therefore, assignments are given only for protonated carbons, which could be assigned by their HSQC correlations. HR-MS (MALDI):  $m/z = 1382.6743$ , calcd. for  $\text{C}_{108}\text{H}_{86}$  ( $[\text{M}]^+$ ):  $m/z = 1382.6730$ , error = 0.9 ppm. EA calculated for  $\text{C}_{108}\text{H}_{86}$ : C 93.74%, H 6.26%, found: C 93.92%, H 6.04%.

**5-Bromo-4'-(*tert*-butyl)-[1,1'-biphenyl]-2,4-dicarbaldehyde (11)**

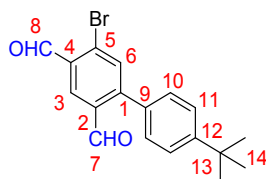

**11**

Starting from compound **10** and following a procedure similar to that for compound **6**, compound **11** was obtained as a white solid in 68% yield.  $^1\text{H}$  NMR (500 MHz,  $\text{CD}_2\text{Cl}_2$ ):  $\delta$  10.38 (s, 1H; 8), 9.96 (s, 1H; 7), 8.42 (s, 1H; 3), 7.81 (s, 1H; 6), 7.54 (d, 8.7 Hz, 2H; 11), 7.33 (d, 8.7 Hz, 2H; 10), 1.37 ppm (s, 9H; 14).  $^{13}\text{C}$  NMR (125 MHz,  $\text{CD}_2\text{Cl}_2$ ):  $\delta$

190.8 (7), 190.7 (8), 153.1 (12), 151.4 (1), 136.6 (6), 133.6 (2), 132.9 (4), 132.7 (9), 131.2 (5), 129.9 (10), 129.8 (3), 126.1 (11), 35.0 (13), 31.3 ppm (14). HR-MS (ESI):  $m/z = 344.0406$ , calcd. for  $C_{18}H_{17}BrO_2$  ( $[M]^+$ ):  $m/z = 344.0412$ , error = -1.61 ppm.

**4'-(tert-Butyl)-5-(4,4,5,5-tetramethyl-1,3,2-dioxaborolan-2-yl)-[1,1'-biphenyl]-2,4-dicarbaldehyde (12)**

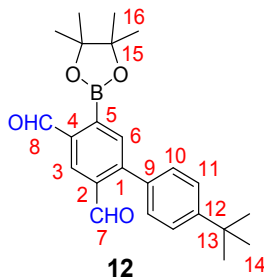

Starting from compound **11** and following a procedure similar to that for compound **7**, compound **12** was obtained as a white solid in 88% yield.  $^1H$  NMR (500 MHz,  $CDCl_3$ ):  $\delta$  10.46 (s, 1H; 8), 10.05 (s, 1H; 7), 8.51 (s, 1H; 3), 7.87 (s, 1H; 6), 7.52 (d, 8.3 Hz, 2H; 11), 7.35 (d, 8.3 Hz, 2H; 10), 1.42 (s 12H; 16), 1.38 ppm (s, 9H; 14).  $^{13}C$  NMR (125 MHz,  $CDCl_3$ ):  $\delta$  193.0 (8), 191.7 (7), 152.1 (12), 149.3 (1), 139.9 (4), 137.7 (6), 137.2 (very br; 5, identified by HMBC correlation to H<sub>3</sub>), 135.0 (2), 133.8 (9), 129.7 (10), 128.3 (3), 125.6 (11), 84.8 (15), 34.8 (13), 31.3 (14), 24.9 ppm (16). HR-MS (ESI):  $m/z = 391.2197$ , calcd. for  $C_{24}H_{29}BO_4$  ( $[M]^+$ ):  $m/z = 391.2195$ , error = 0.67 ppm.

**5,5''-(Benzo[a]dinaphtho[2,1,8-cde:1',2',3',4'-ghi]perylene-9,18-diyl)bis(4'-(tert-butyl)-[1,1'-biphenyl]-2,4-dicarbaldehyde) (13):**

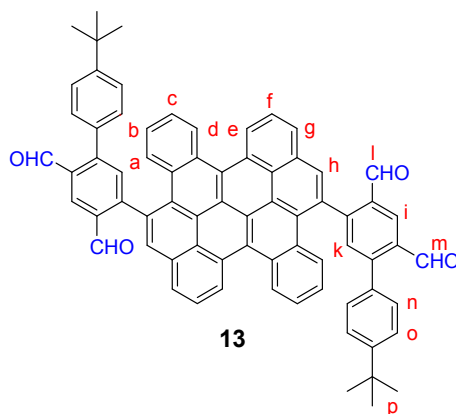

Starting from compound **4** and compound **12**, following a procedure similar to that for compound **8**, compound **13** was obtained as a yellow coloured solid in 66% yield. Final purification was done by recycling gel permeation chromatography using  $CHCl_3$  as the eluent. Similar to compound **8**, the  $^1H$  NMR spectrum of **13** is much more complex than expected from the chemical structure due to several isomers. VT measurements (30°C – 120°C) reveal internal motions by line narrowing and line broadening effects.  $^1H$  NMR (500 MHz,  $C_2D_2Cl_4$ , 120°C):  $\delta$  10.28 (s, 2H; m), 10.06 and 10.01 (br, 2H; l), 9.29 (d, 8.6 Hz, 2H; d), 9.15 (d, 7.6 Hz, 2H; e), 8.82 (s, 2H; h, i or k), 8.33 (d, 8.3 Hz, 2H; g), 8.30 (s, 2H; h, i or k), 8.21 (d, 8.6 Hz, 2H; a), 8.17 (t, 8.3 Hz, 2H; f), 7.96 and 7.94 (br s, 2H; h, i or k), 7.58 (d, 8.3 Hz, 4H; o), 7.49 (br d, 4H; n), 7.44 (t, 8.0 Hz, 2H; c), 1.44 ppm (s, 18H; p).  $^{13}C$  NMR (125 MHz,  $C_2D_2Cl_4$ , 30°C):  $\delta$  191.6, 190.8, 190.7 and 190.6 (all CHO), 152.3, 151.9, 151.8, 150.6, 150.5, 133.5, 133.1, 133.0, 132.8, 132.7, 132.4, 130.9, 129.7, 129.4, 129.1, 129.0, 128.7, 128.6, 128.5, 128.0, 127.6, 126.8, 126.6, 125.8, 125.7, 125.6, 125.4, 125.1, 124.8, 124.4, 123.9, 123.8, 34.5 ( $C_{tBu}$ ), 31.1 ppm ( $CH_3$ ). HR-MS (MALDI):  $m/z = 978.3701$ , calcd. for  $C_{72}H_{50}O_4$  ( $[M]^+$ ):  $m/z = 978.3709$ , error = -0.8 ppm. EA calculated for  $C_{72}H_{50}O_4$ : C 88.32%, H 5.15%, found: C 88.60 %, H 4.99%.

**5,20-Di-*tert*-butyl-1,3,16,18-tetramesityl-1,3,16,18-tetrahydrobenzo[*a*]benzo[6,7]-*s*-indaceno[1,2-*k*]benzo[6',7']-*s*-indaceno[1',2':3,4]naphtho[2,1,8-*cde*]naphtho[1,2,3,4-*gh*]perylene (14)**

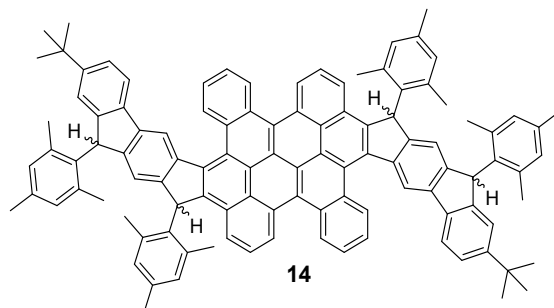

Starting from compound **13** and following a procedure similar to that for compound **9**, compound **14** was obtained as a yellow coloured solid in 88% yield. Similar to compound **9**, the  $^1\text{H}$  NMR spectrum of compound **14** is very complex owing to diastereomers. VT measurements ( $-50^\circ\text{C} - 120^\circ\text{C}$ ) reveal internal motions by line narrowing and line broadening effects. Signals of different intensity point to minor and major isomers.  $^1\text{H}$  NMR (500 MHz,  $\text{C}_2\text{D}_2\text{Cl}_4$ ,  $120^\circ\text{C}$ ): selected signals 9.62, 9.39, 9.18, 9.04, 8.0-7.7, 7.46, 7.25, 7.21, 7.17, 7.04,, 7.01, 6.71, 6.58, 6.31, 6.15, 5.65, 5.55, 3.03, 2.94, 2.75, 2.67, 2.5-2.2, 1.36 ppm.  $^{13}\text{C}$  NMR (125 MHz,  $\text{C}_2\text{D}_2\text{Cl}_4$ ,  $30^\circ\text{C}$ ): selected signals 150.3, 146.9, 139.1, 137.7, 137.4, 136.1, 135.5, 130.3, 128.6, 127.5, 123.8, 122.6, 120.8, 119.6, 119.1, 115.1, 114.9, 50.5, 49.7, 34.6, 31.4, 22.5, 22.2, 21.7, 19.4, 19.0 ppm. HR-MS (MALDI):  $m/z = 1386.7043$ , calcd. for  $\text{C}_{108}\text{H}_{90}$  ( $[\text{M}]^+$ ):  $m/z = 1386.7043$ , error = 0 ppm. EA calculated for  $\text{C}_{108}\text{H}_{90}$ : C 93.46%, H 6.54%, found: C 93.48%, H 6.46%.

**5,20-Di-*tert*-butyl-1,3,16,18-tetramesitylbenzo[*a*]benzo[6,7]-*s*-indaceno[1,2-*k*]benzo[6',7']-*s*-indaceno[1',2':3,4]naphtho[2,1,8-*cde*]naphtho[1,2,3,4-*gh*]perylene (2)**

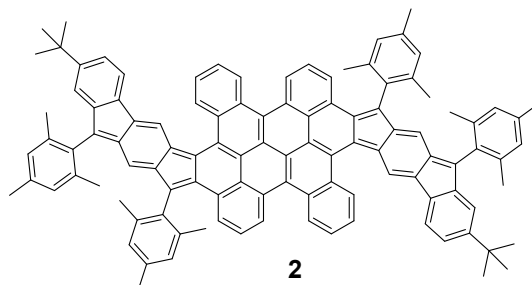

Starting from compound **14** and following a procedure similar to that for compound **1**, compound **2** was obtained as a deep-green colored solid in 67% yield.  $^1\text{H}$  NMR (500 MHz,  $\text{C}_2\text{D}_2\text{Cl}_4$ ,  $90^\circ\text{C}$ ):  $\delta$  9.12 (br, 2H; a), 8.81 (br, 2H; d), 8.50 (d, 8.0 Hz, 2H; e), 7.63 (4H; b, c), 7.29 (t, 8.0 Hz, 2H; f), 7.26 (br, 2H; h), 7.01 (s, 4H; o or r), 6.95 (d, 8.0 Hz, 2H; g), 6.92 (br s, 4H; o or r), 6.81 (br s, 4H; i and k), 6.34 (br s, 2H; l), 6.03 (br s, 2H; m), 2.41 (s, 6H; t or q), 2.34 (br s, 18H; t or q, p or s), 2.22 (s, 12H; p or s), 1.18 ppm (s, 18H; n). Recording a  $^{13}\text{C}$  NMR spectrum was not successful in a reasonable measuring time due to the limited amount of substance and signal broadening also for  $^{13}\text{C}$  NMR signals in the available temperature range.  $^1\text{H}$  NMR (500 MHz, toluene- $d_8$ ,  $70^\circ\text{C}$ ):  $\delta$  9.20 (br, 2H; a), 8.73 (br, 2H; d), 8.34 (d, 7.8 Hz, 2H; e), 7.49 (br, 2H; h), 7.36 (4H; b, c), 7.28 (d, 7.8 Hz, 2H; g), 7.00 (t, 7.8 Hz, 2H; f), 6.79 (s, 4H; o), 6.74 (d, 7.9 Hz, 2H; i), 6.70 (d, 7.9 Hz, 2H; k), 6.61 (br s, 4H; r), 6.54 (br s, 2H; l), 6.27 (br s, 2H; m), 2.42 (vbr s, 12H; p), 2.19 (br s, 12H; s), 2.06 (s, 6H; q), 1.03 ppm (s, 18H; n). HR-MS (MALDI):  $m/z = 1382.6731$ , calcd. for  $\text{C}_{108}\text{H}_{86}$  ( $[\text{M}]^+$ ):  $m/z = 1382.6730$ , error = 0.07 ppm. EA calculated for  $\text{C}_{108}\text{H}_{86}$ : C 93.74%, H 6.26%, found: C 93.64%, H 6.32%.

2. HR MALDI-TOF MS for 1 and 2

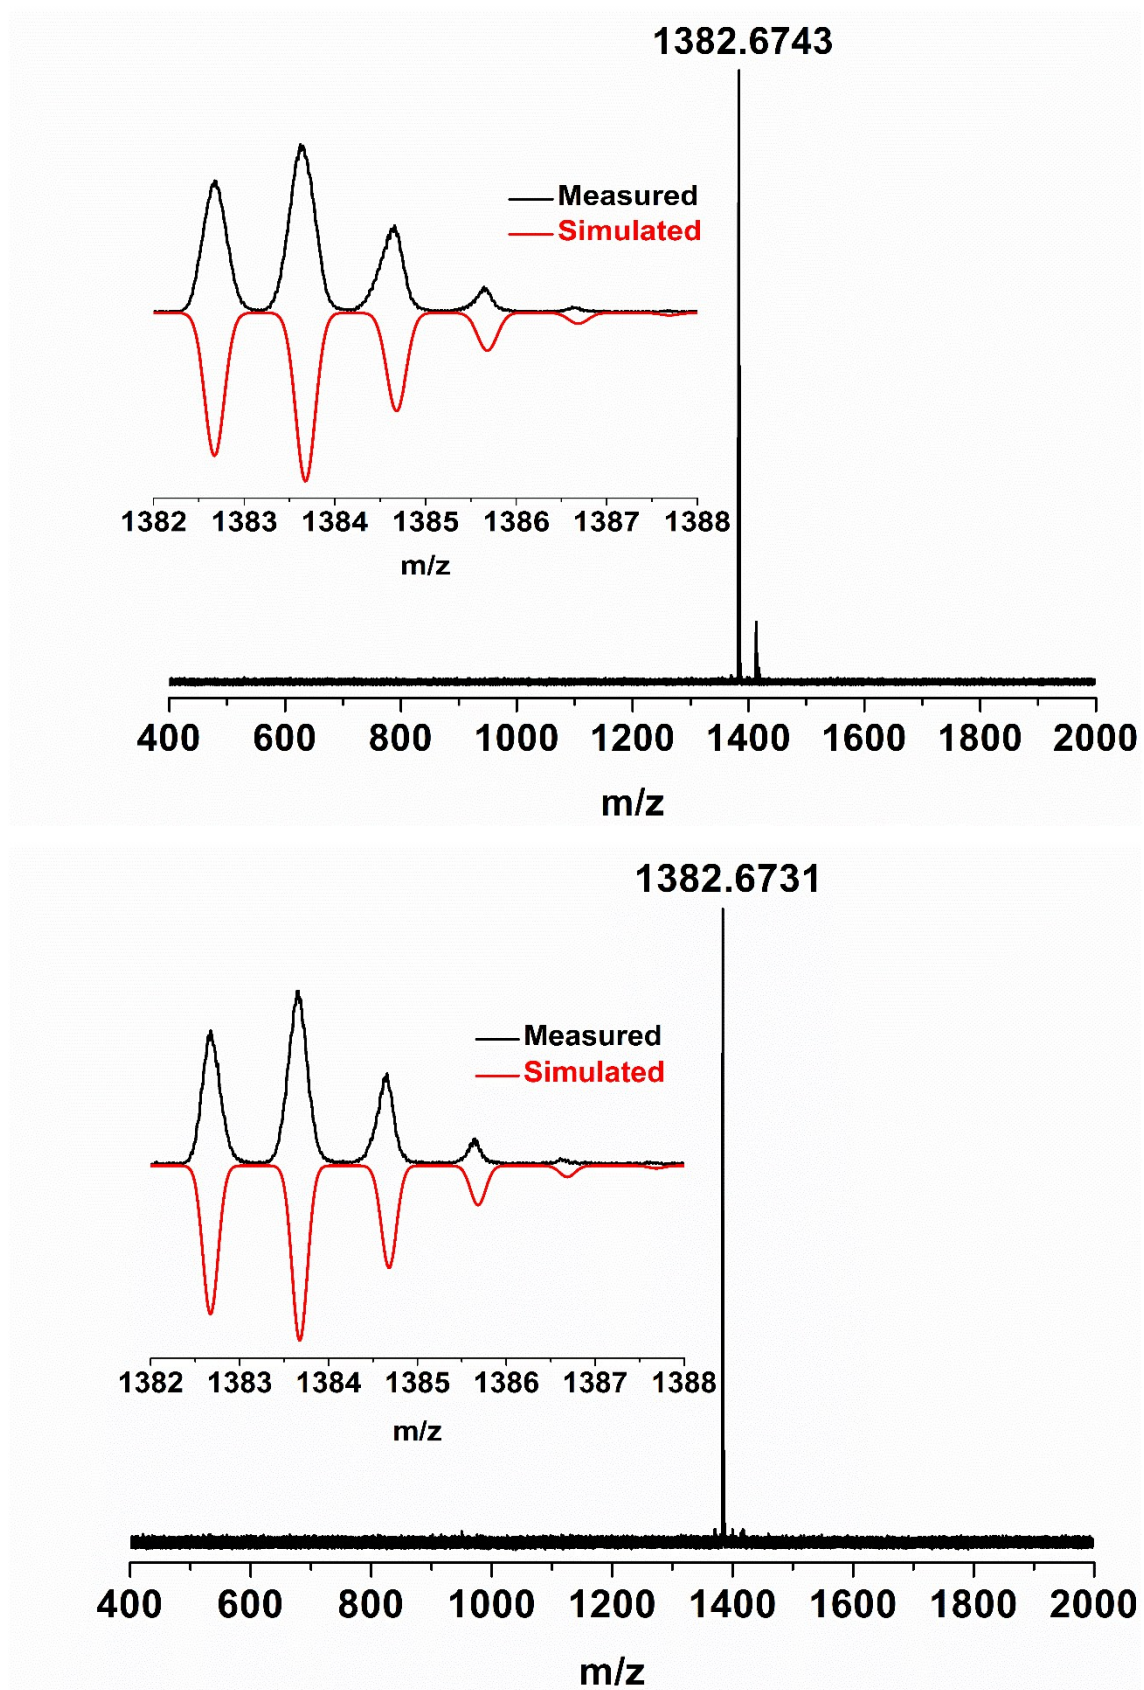

Figure S1. HR-MALDI-TOF mass spectra of 1 and 2.



### 3. NMR spectra of 1 and 2

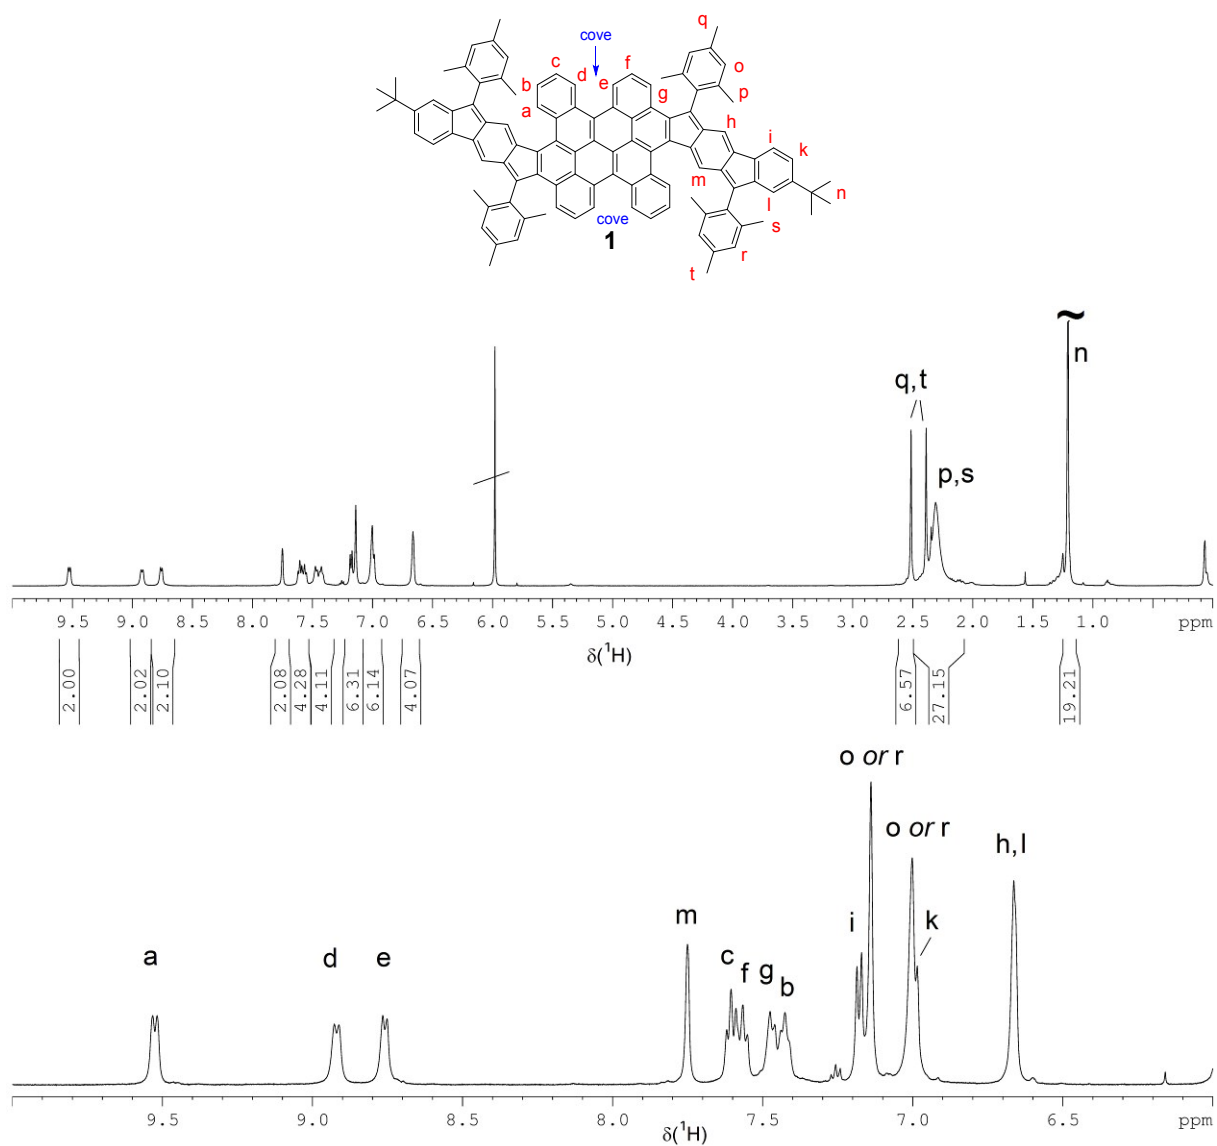

**Figure S2.**  $^1\text{H}$  NMR spectrum of **1** (solvent:  $\text{C}_2\text{D}_2\text{Cl}_4$ , 303 K).

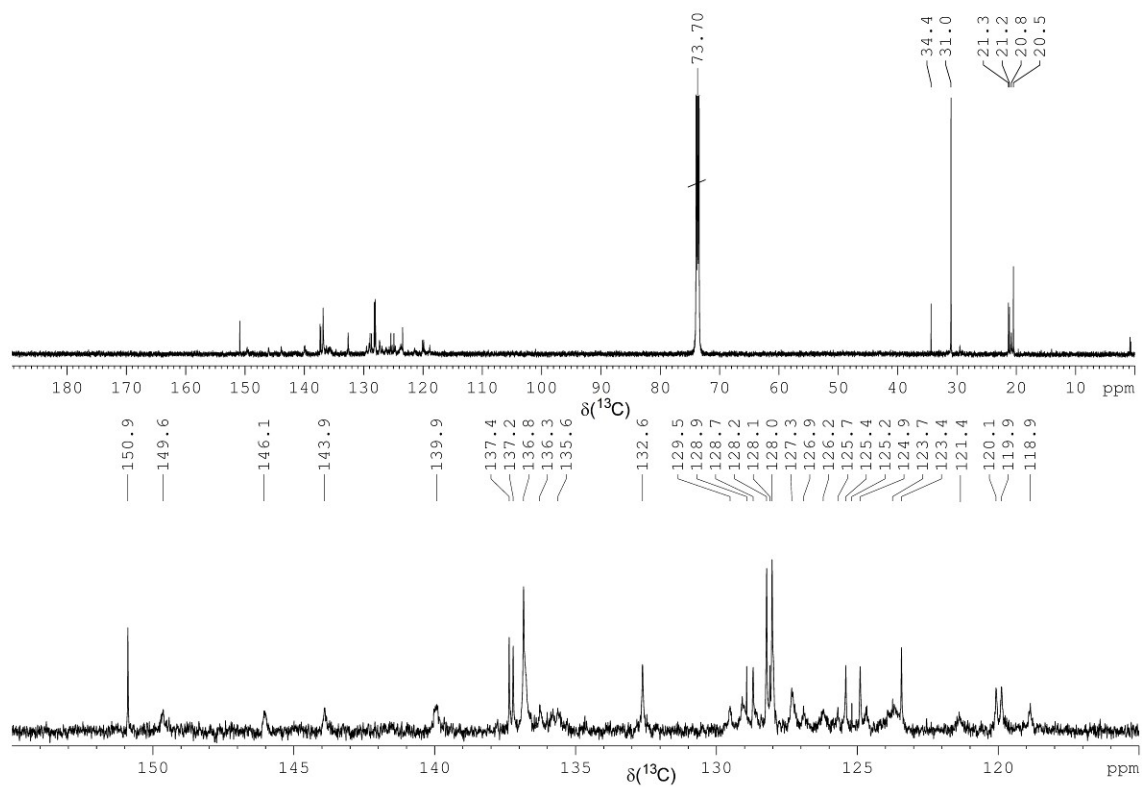

**Figure S3.**  $^{13}\text{C}$  NMR spectrum of **1** (solvent:  $\text{C}_2\text{D}_2\text{Cl}_4$ , 303 K).

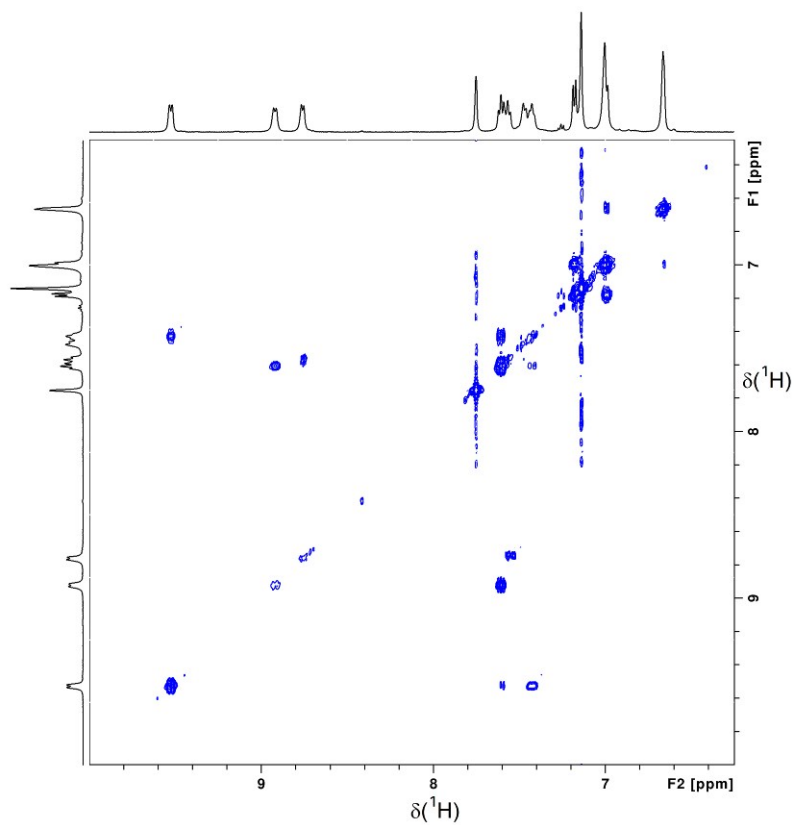

**Figure S4.** COSY spectrum (region) of **1** (solvent:  $\text{C}_2\text{D}_2\text{Cl}_4$ , 303 K).

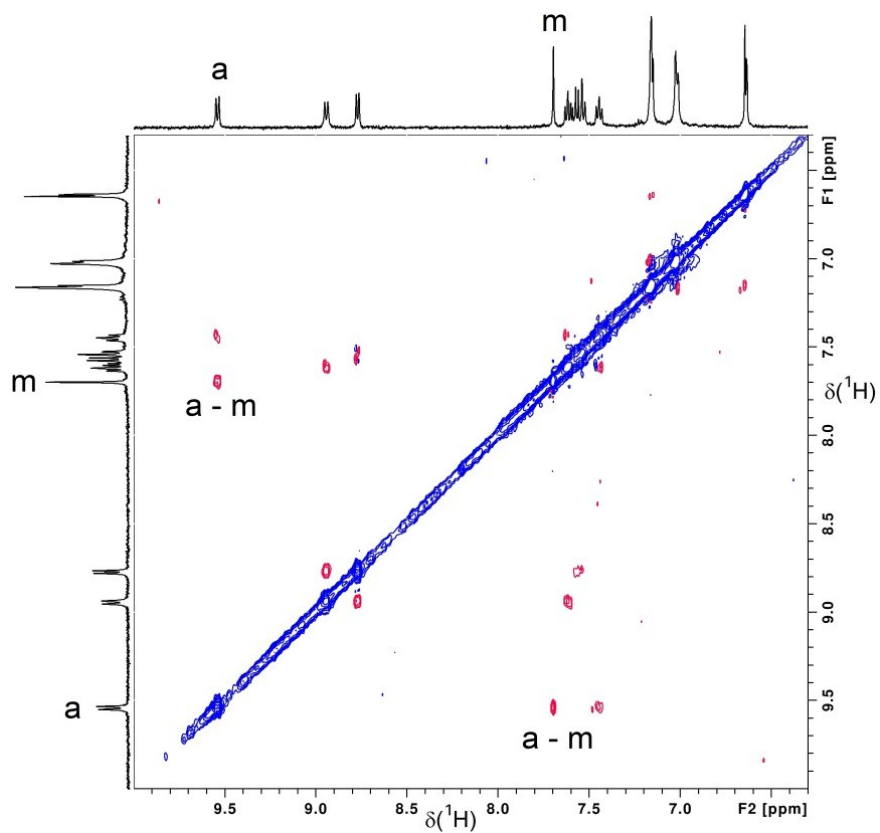

**Figure S5.** ROESY spectrum (region) of **1** (solvent:  $\text{CD}_2\text{Cl}_2$ , 303 K).

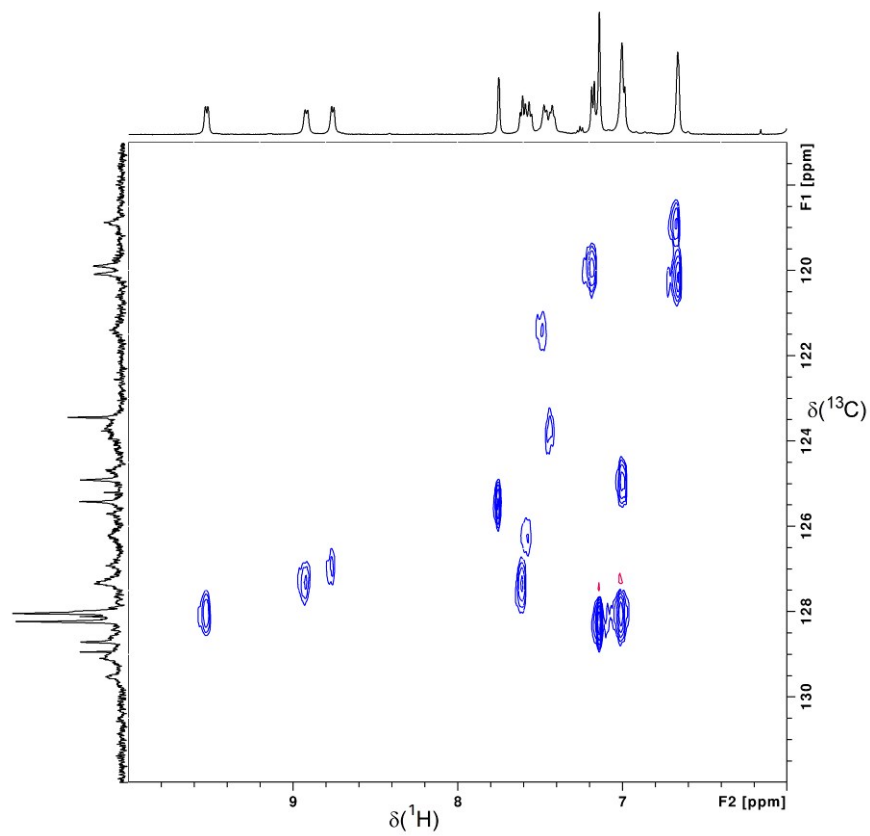

**Figure S6.** HSQC spectrum (region) of **1** (solvent:  $\text{C}_2\text{D}_2\text{Cl}_4$ , 303 K).

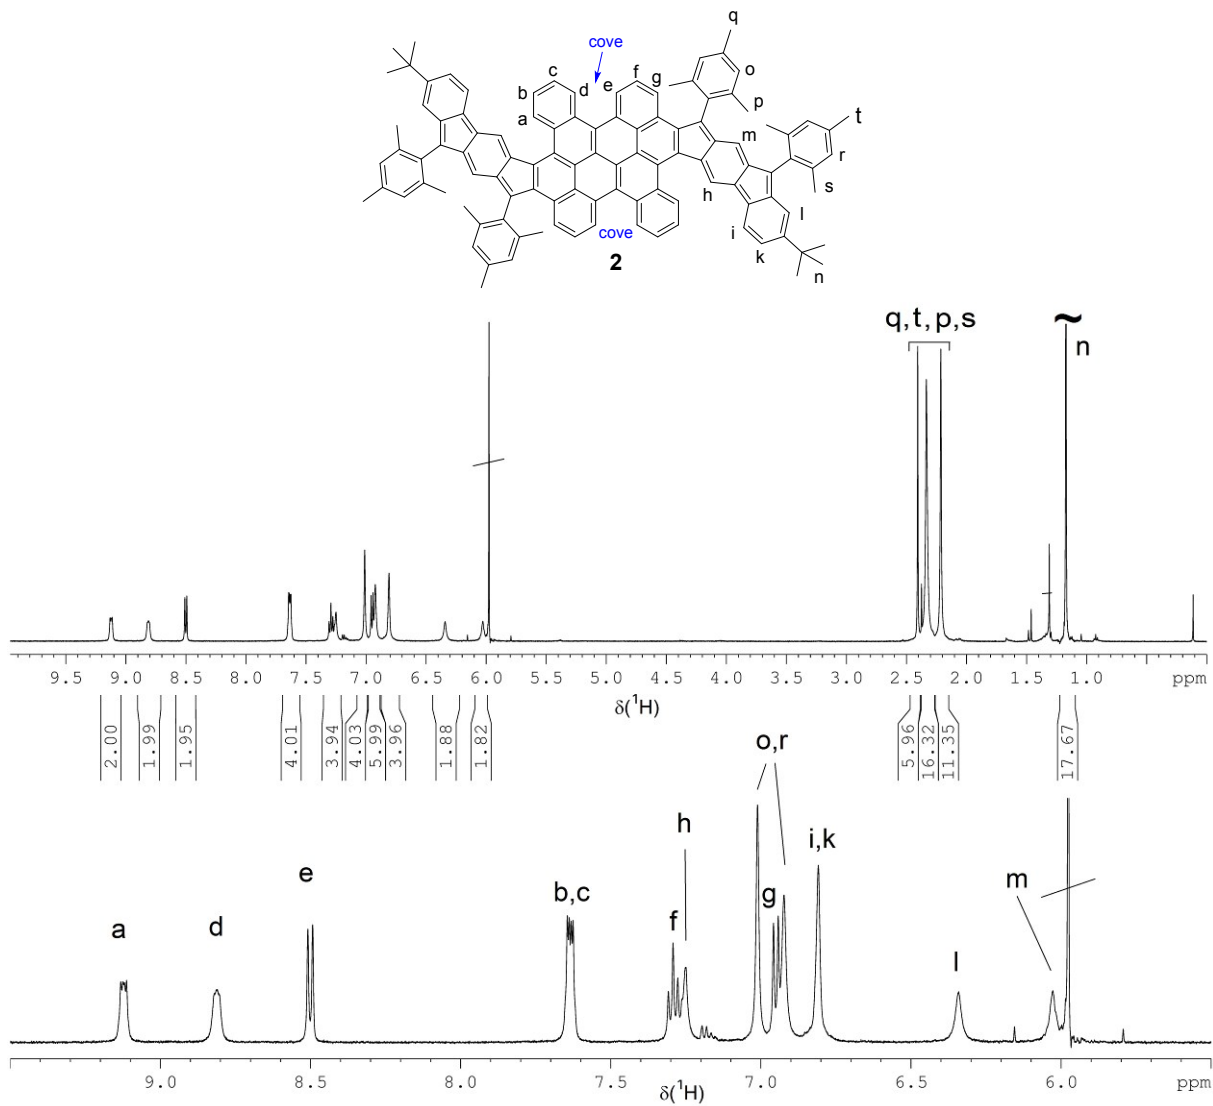

**Figure S7.**  $^1\text{H}$  NMR spectrum of **2** (solvent:  $\text{C}_2\text{D}_2\text{Cl}_4$ , 363 K).

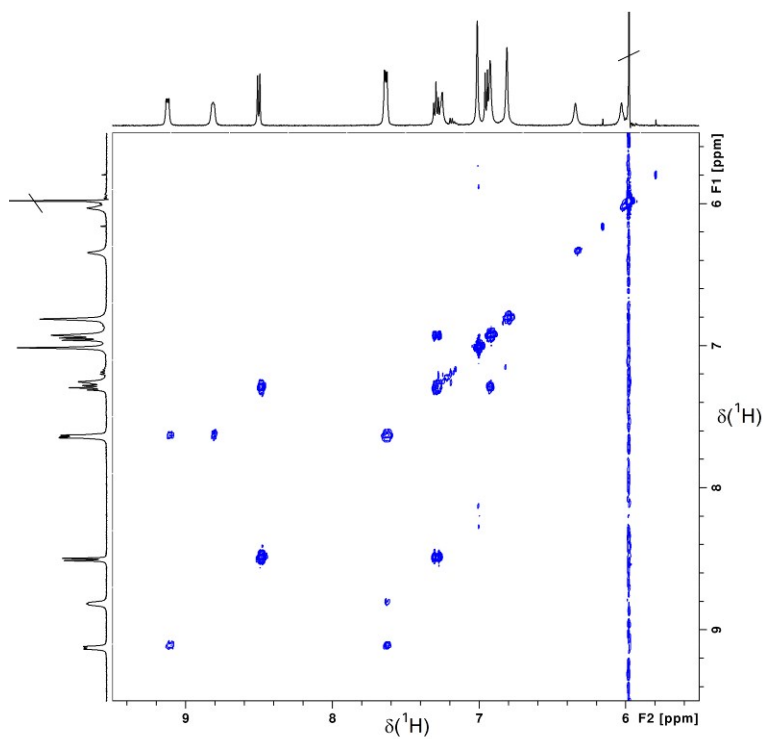

**Figure S8.** COSY spectrum (region) of **2** (solvent: C<sub>2</sub>D<sub>2</sub>Cl<sub>4</sub>, 363 K).

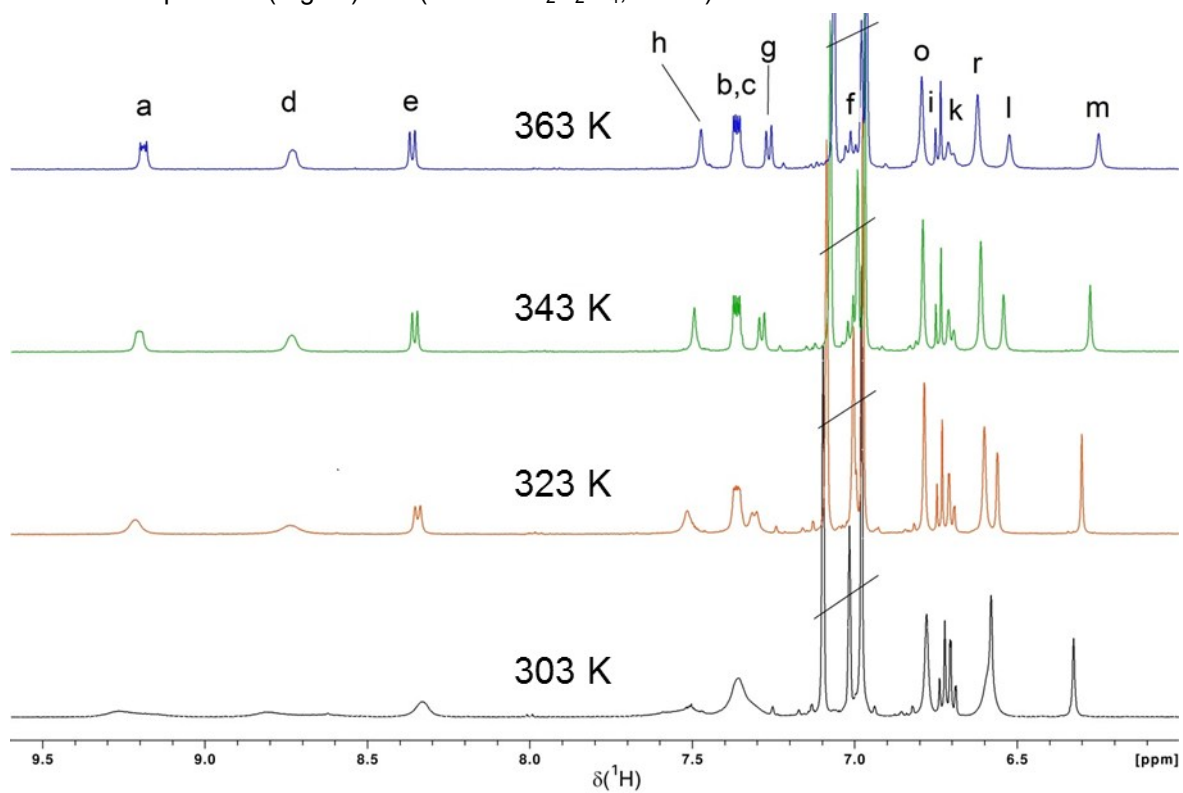

**Figure S9.** <sup>1</sup>H NMR spectra (region of aromatic protons) of **2** recorded in toluene-d<sub>8</sub> at different temperatures.

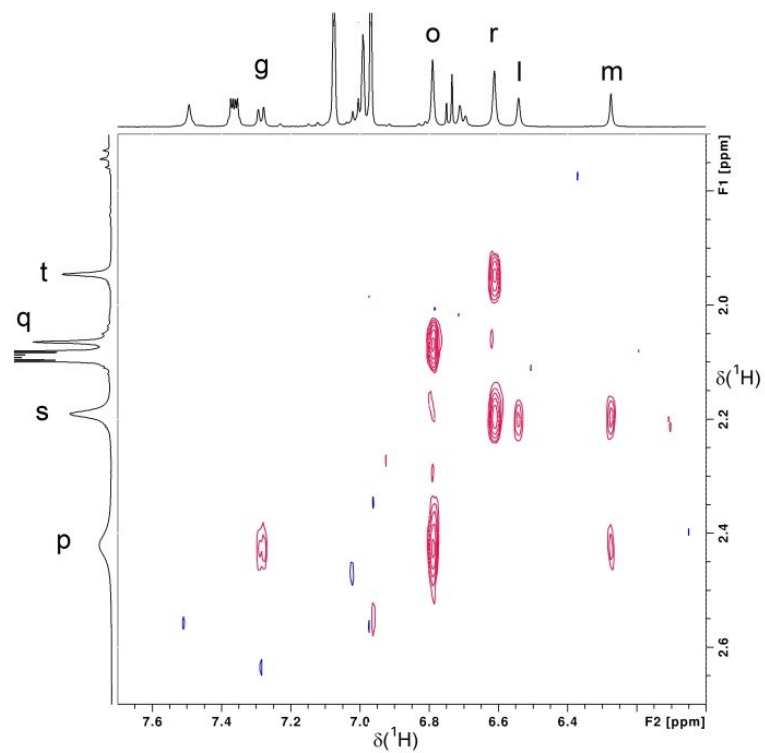

**Figure S10.** ROESY spectrum of **2** recorded in toluene- $d_8$  at 343 K. The depicted region shows the correlations that allow the assignment of the mesityl group signals o – q and r – t.

Temperature-dependent NMR measurement of 1 and 2 in different solvent

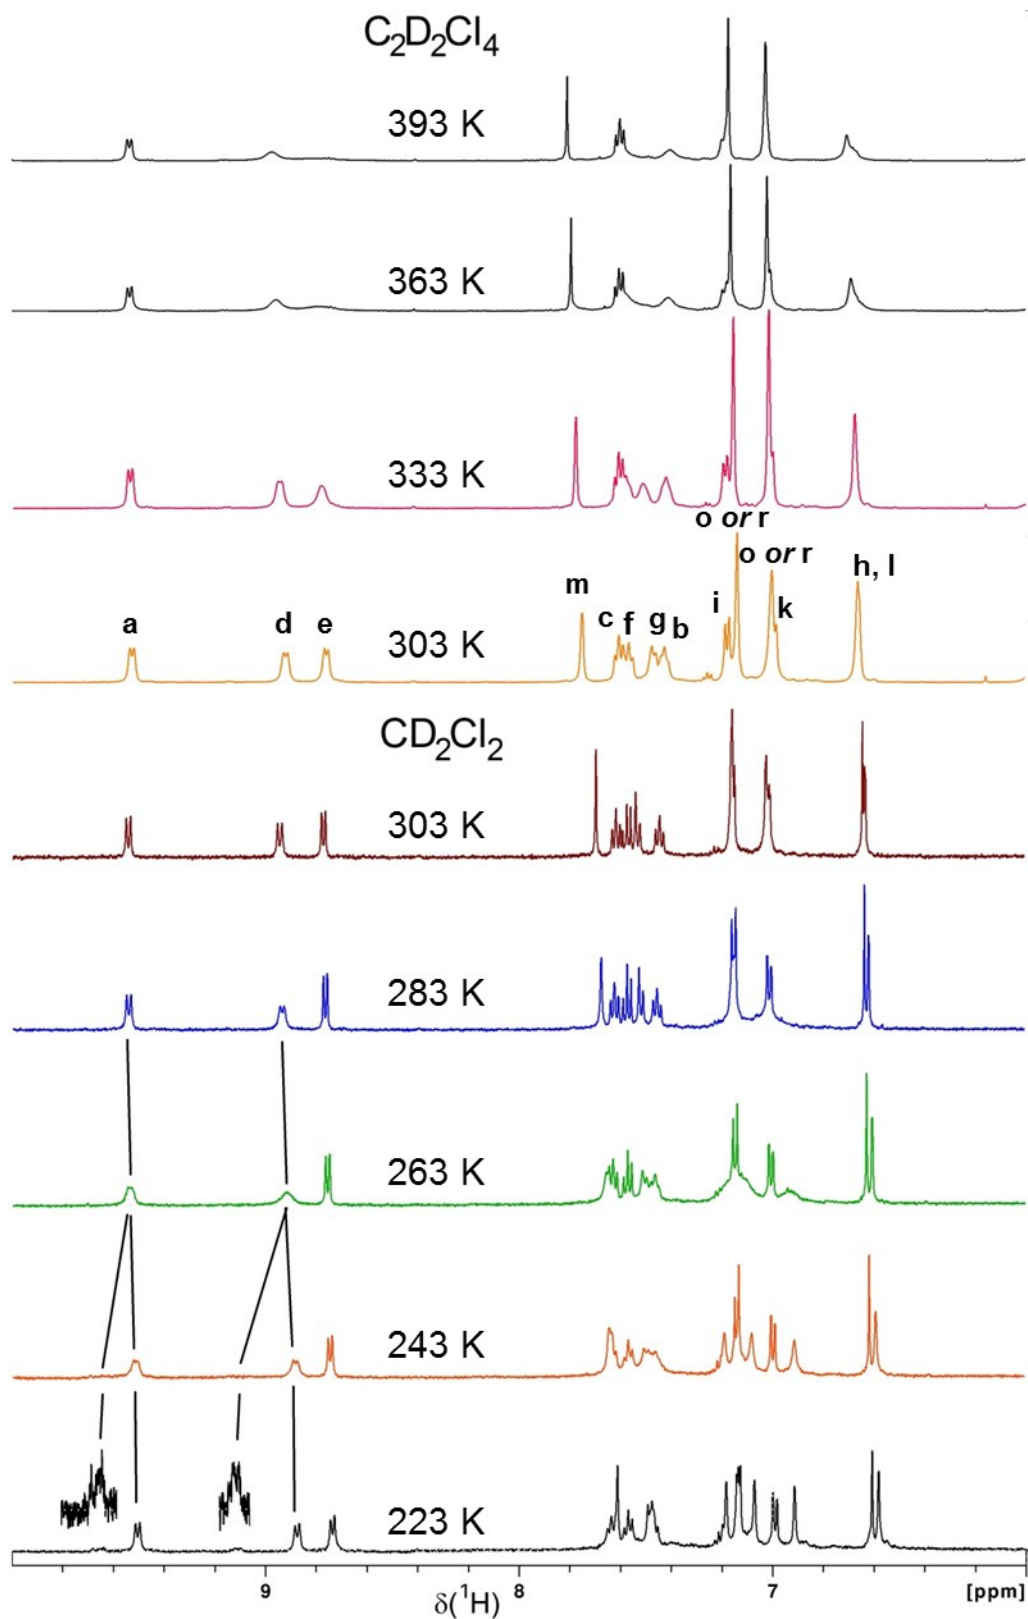

**Figure S11.**  $^1\text{H}$  NMR spectra (region of aromatic protons) of 1 recorded in  $\text{CD}_2\text{Cl}_2$  at 223, 243, 263, 283 and 303 K and recorded in  $\text{C}_2\text{D}_2\text{Cl}_4$  at 303, 333, 363 and 393 K. The lines, which represent a guide for the eye, indicate coalescence processes of selected signals.

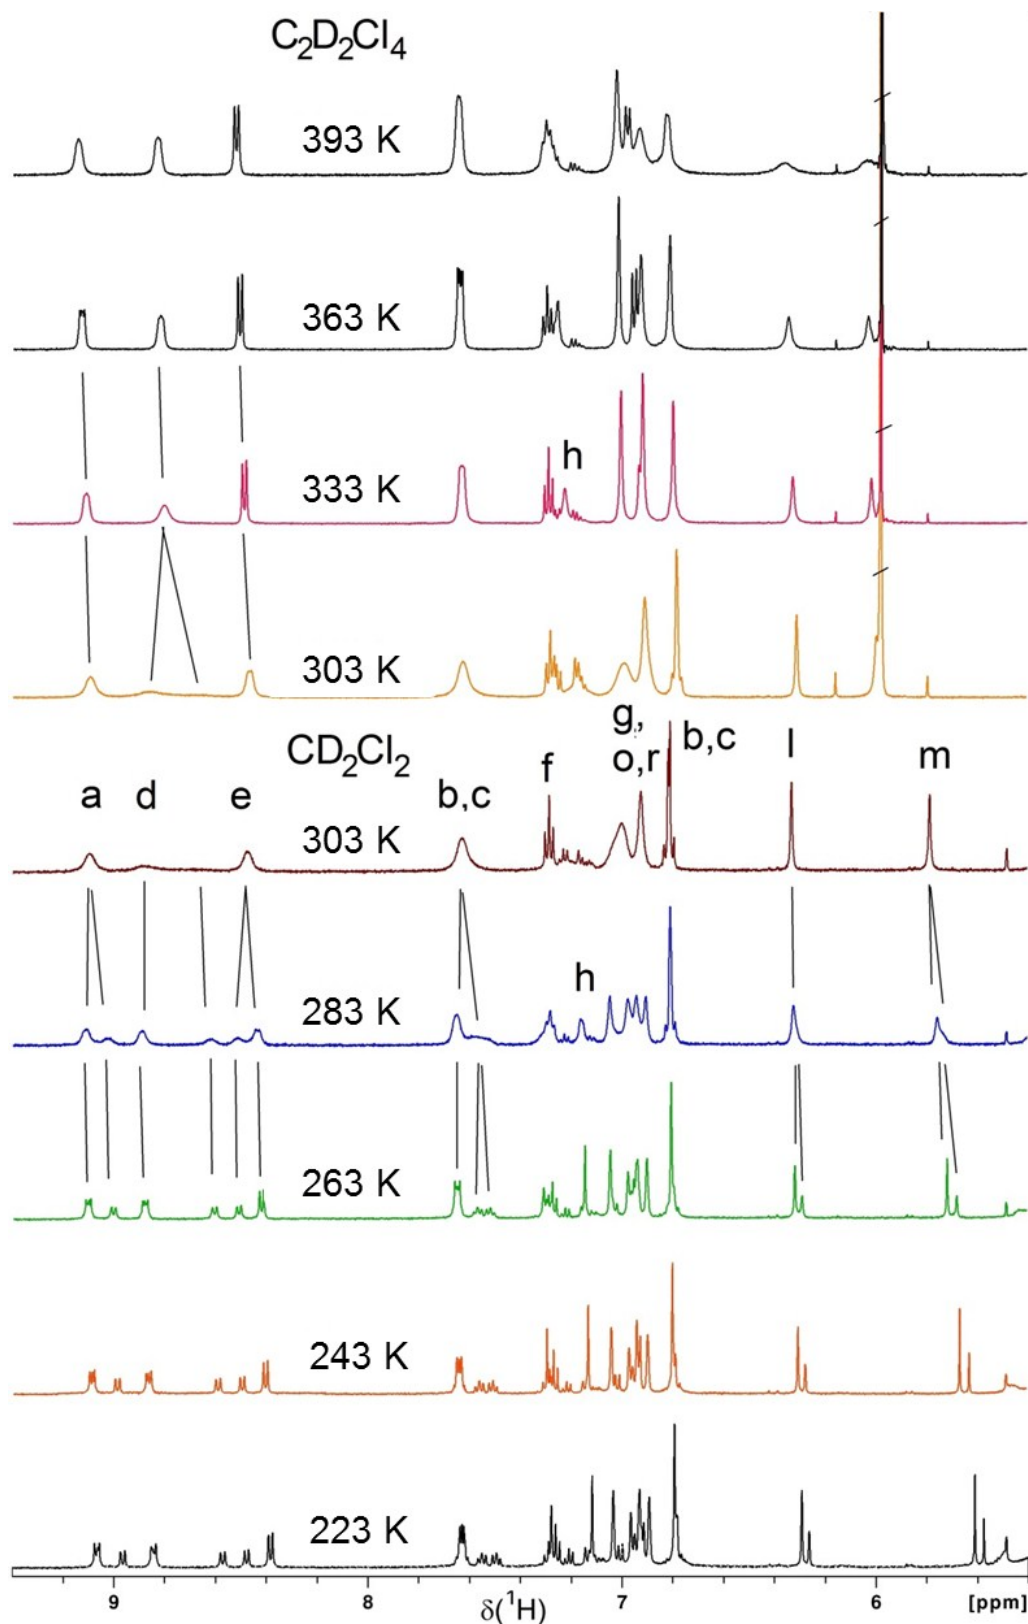

**Figure S12.**  $^1H$  NMR spectra (region of aromatic protons) of **2** recorded in  $CD_2Cl_2$  at 223, 243, 263, 283 and 303 K and recorded in  $C_2D_2Cl_4$  at 303, 333, 363 and 393 K. The solid lines, which represent a guide for the eye, indicate coalescence processes for selected signals.



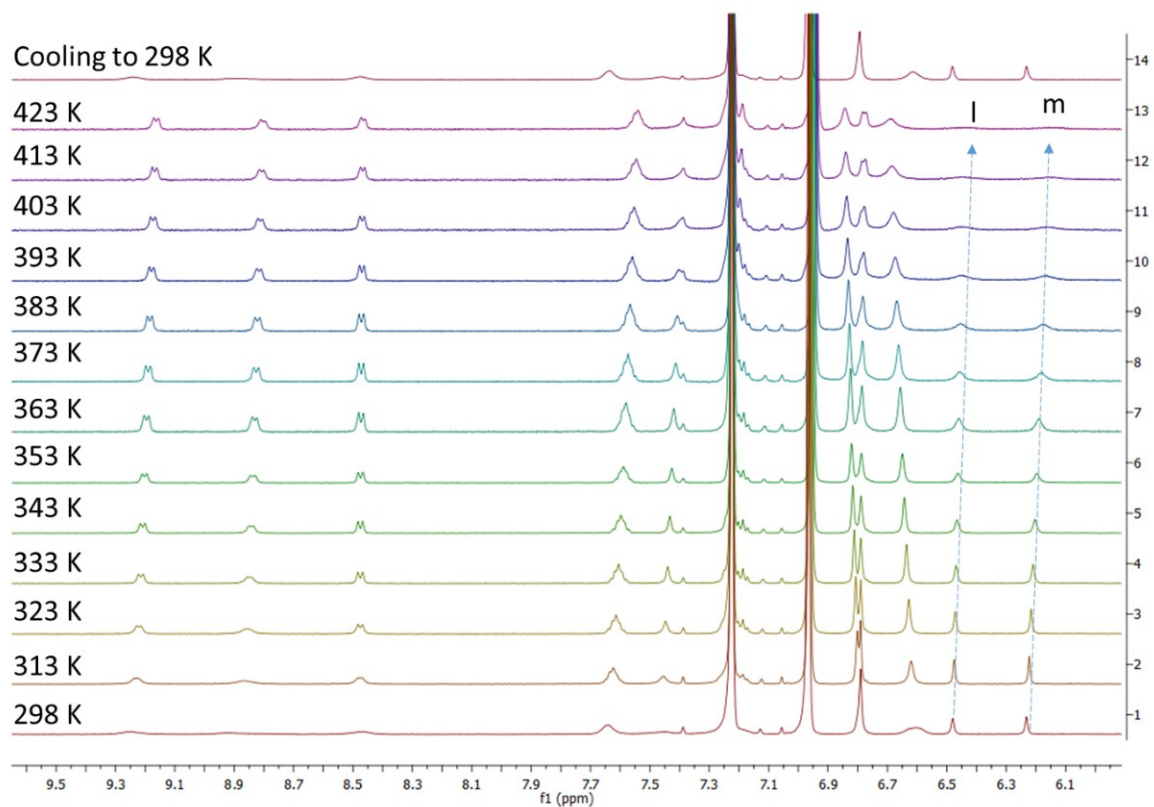

**Figure S13.** VT  $^1\text{H}$  NMR spectra (region of aromatic protons) of **2** recorded in  $o\text{-C}_6\text{D}_4\text{Cl}_2$ .

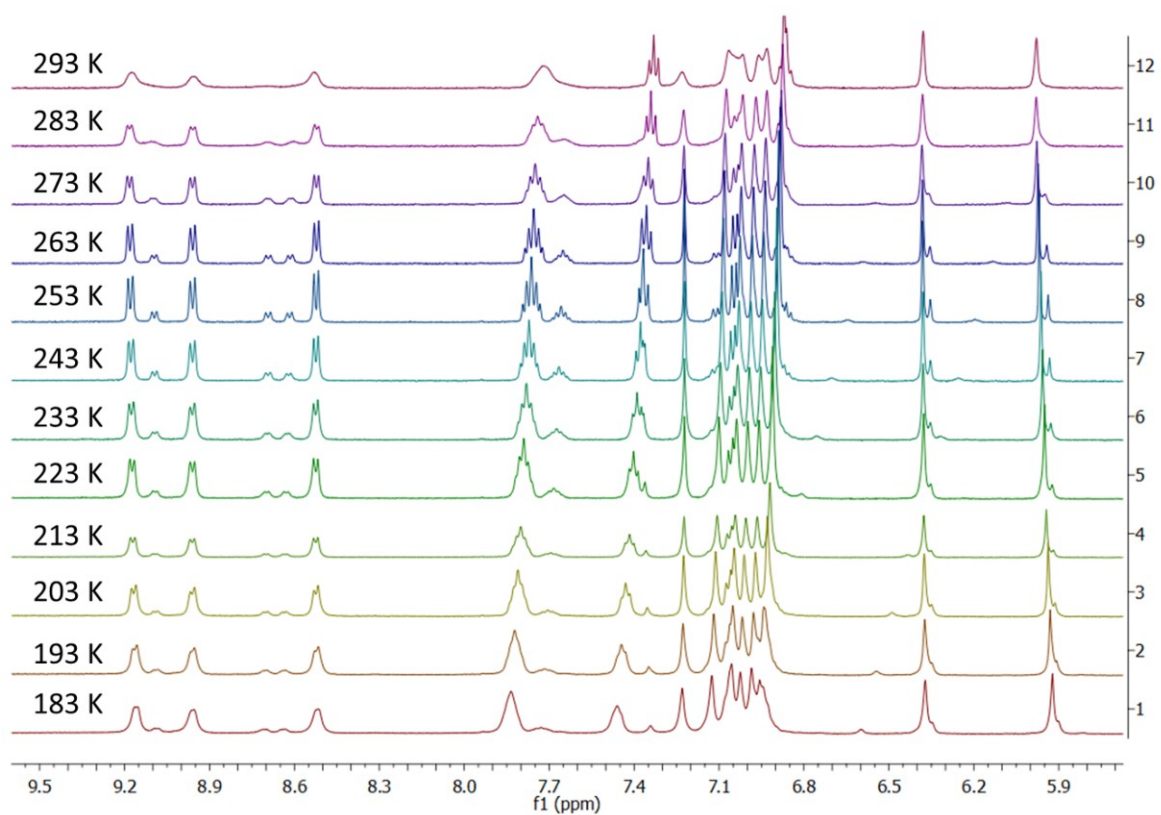

**Figure S14.** VT  $^1\text{H}$  NMR spectra (region of aromatic protons) of **2** recorded in  $\text{THF-d}_8$ .

#### 4. Variable-temperature EPR measurements of 2

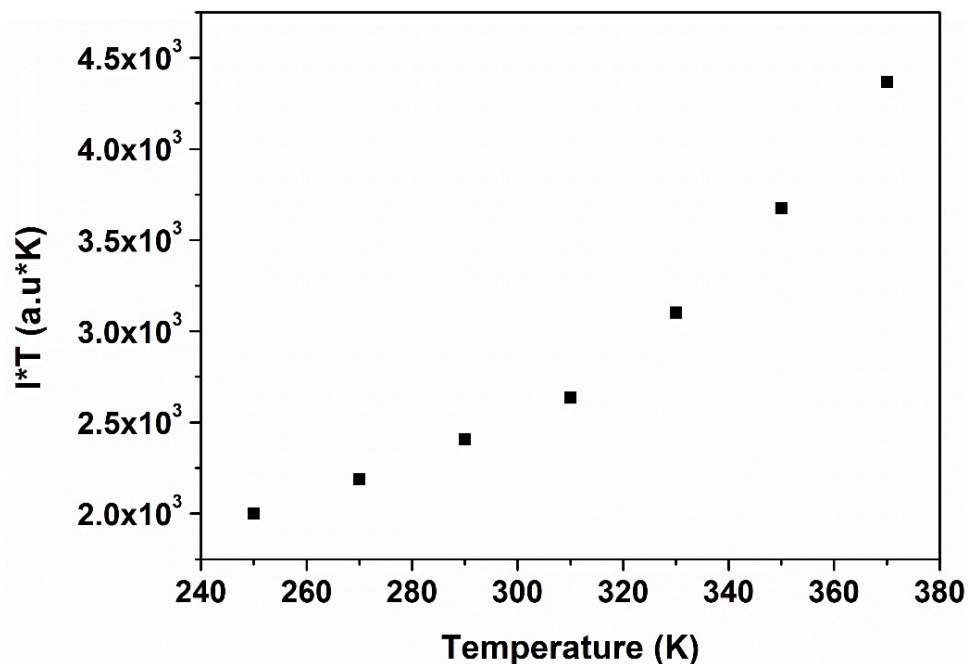

Figure S15. The change of  $I \cdot T$  with temperature  $T$  for 2.  $I$  is the integrated ESR intensity and  $T$  is temperature.

#### 5. Time-dependent UV/Vis spectra of 1 and 2

During the stability test, the solution of 1 and 2 in  $\text{CH}_2\text{Cl}_2$  was exposed to ambient air and sun light conditions. There was not significant change of the absorption curves of both molecules within 10 days under ambient conditions (Figure S16). For compound 1, the main absorption peaks did not change with the time going on. And, the half-life time ( $t_{1/2}$ ) of 2 was estimated as 91 days under ambient air and sun light condition by plotting the absorption intensity at the 842 nm with ambient light irradiation time according to the linear regression and extrapolation to % change = 0.50 (Figure S17).

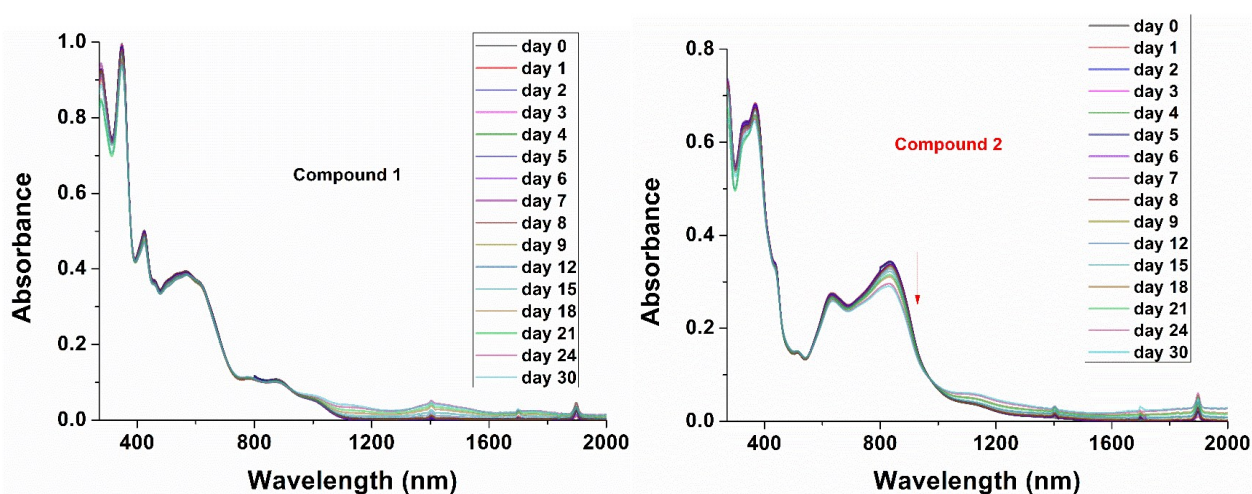

Figure S16. Absorption spectral changes under ambient air and light irradiation for 1 (a) and 2 (b) in  $\text{CH}_2\text{Cl}_2$ .

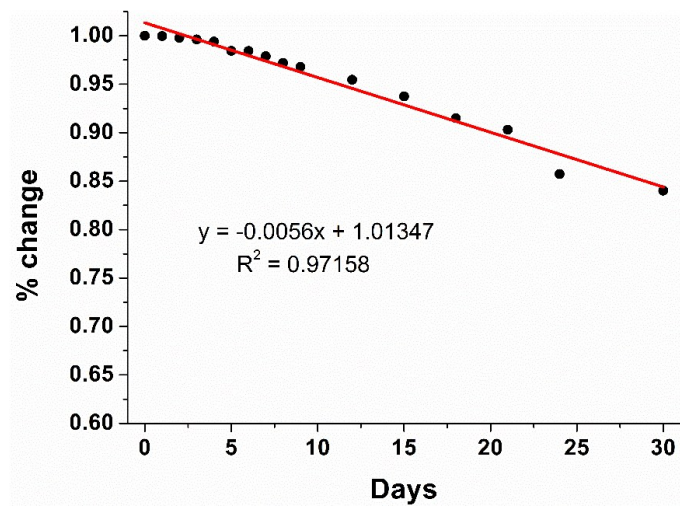

**Figure S17.** Changes of optical density of **2** at the absorption maximum (842 nm) as a function of ambient light irradiation time.

## 6. X-ray crystallographic analysis of **2** and **9**

Accession codes: The X-ray crystallographic coordinates for structures reported in this article have been deposited at the Cambridge Crystallographic Data Centre (CCDC), under deposition number CCDC 1829452 (for **2**) and CCDC 1870938 (for **9**). These data can be obtained free of charge from CCDC via [http://www.ccdc.cam.ac.uk/data\\_request/cif](http://www.ccdc.cam.ac.uk/data_request/cif)

**Table S1.** Summary of crystal data and reflection collection parameters for **2** and **9**.

|                                                                                         | <b>2</b>                                                                       | <b>9</b>                                                                  |
|-----------------------------------------------------------------------------------------|--------------------------------------------------------------------------------|---------------------------------------------------------------------------|
| Empirical formula                                                                       | C <sub>108</sub> H <sub>86</sub>                                               | C <sub>108</sub> H <sub>90</sub>                                          |
| Formula weight                                                                          | 1383.76                                                                        | 1387.79                                                                   |
| Crystal size, mm                                                                        | 0.175 × 0.151 × 0.026                                                          | 0.13 × 0.05 × 0.04                                                        |
| Crystal system                                                                          | monoclinic                                                                     | monoclinic                                                                |
| space group                                                                             | P2 <sub>1</sub> /n                                                             | C2/c                                                                      |
| <i>a</i> , Å                                                                            | 14.1458(6)                                                                     | 31.3411(8)                                                                |
| <i>b</i> , Å                                                                            | 13.4627(4)                                                                     | 28.1487 (6)                                                               |
| <i>c</i> , Å                                                                            | 22.3724(6)                                                                     | 24.3410 (7)                                                               |
| $\alpha$ , deg                                                                          | 90                                                                             | 90                                                                        |
| $\beta$ , deg                                                                           | 107.134(4)                                                                     | 107.002 (3)                                                               |
| $\gamma$ , deg                                                                          | 90                                                                             | 90                                                                        |
| <i>V</i> , Å <sup>3</sup>                                                               | 4071.5(2)                                                                      | 205535.4 (10)                                                             |
| <i>Z</i>                                                                                | 2                                                                              | 8                                                                         |
| <i>D</i> <sub>calcd.</sub> , g cm <sup>-3</sup>                                         | 1.129                                                                          | 0.898                                                                     |
| <i>F</i> <sub>000</sub>                                                                 | 1468.0                                                                         | 5904.0                                                                    |
| Temperature, K                                                                          | 100                                                                            | 100                                                                       |
| Radiation                                                                               | CuK $\alpha$ ( $\lambda$ = 1.54184)                                            | CuK $\alpha$ ( $\lambda$ = 1.54184)                                       |
| $\mu$ , mm <sup>-1</sup>                                                                | 0.480                                                                          | 0.381                                                                     |
| 2 $\theta$ range for data collection/°                                                  | 6.628 to 153.134<br>-17 ≤ <i>h</i> ≤ 17, -15 ≤ <i>k</i> ≤ 16, -22 ≤ <i>l</i> ≤ | 7.34 to 125<br>-36 ≤ <i>h</i> ≤ 35, -29 ≤ <i>k</i> ≤ 32, -25 ≤ <i>l</i> ≤ |
| Index ranges                                                                            | 28                                                                             | 28                                                                        |
| no. of collected reflections                                                            | 23305                                                                          | 51204                                                                     |
| no. of unique ref. ( <i>R</i> <sub>int</sub> )                                          | 8423(0.0281)                                                                   | 16287(0.0347)                                                             |
| Data/restraints/parameters                                                              | 8423/0/496                                                                     | 16287/0/843                                                               |
| <i>R</i> <sub>1</sub> , <i>wR</i> <sub>2</sub> [obs <i>I</i> > 2 $\sigma$ ( <i>I</i> )] | 0.0618, 0.1698                                                                 | 0.1246, 0.2951                                                            |
| <i>R</i> <sub>1</sub> , <i>wR</i> <sub>2</sub> (all data)                               | 0.0839, 0.1881                                                                 | 0.1683, 0.3349                                                            |
| residual peak/hole, e. Å <sup>-3</sup>                                                  | 0.30/-0.27                                                                     | 0.53/-0.52                                                                |
| Goodness-of-fit on <i>F</i> <sup>2</sup>                                                | 1.039                                                                          | 0.854                                                                     |

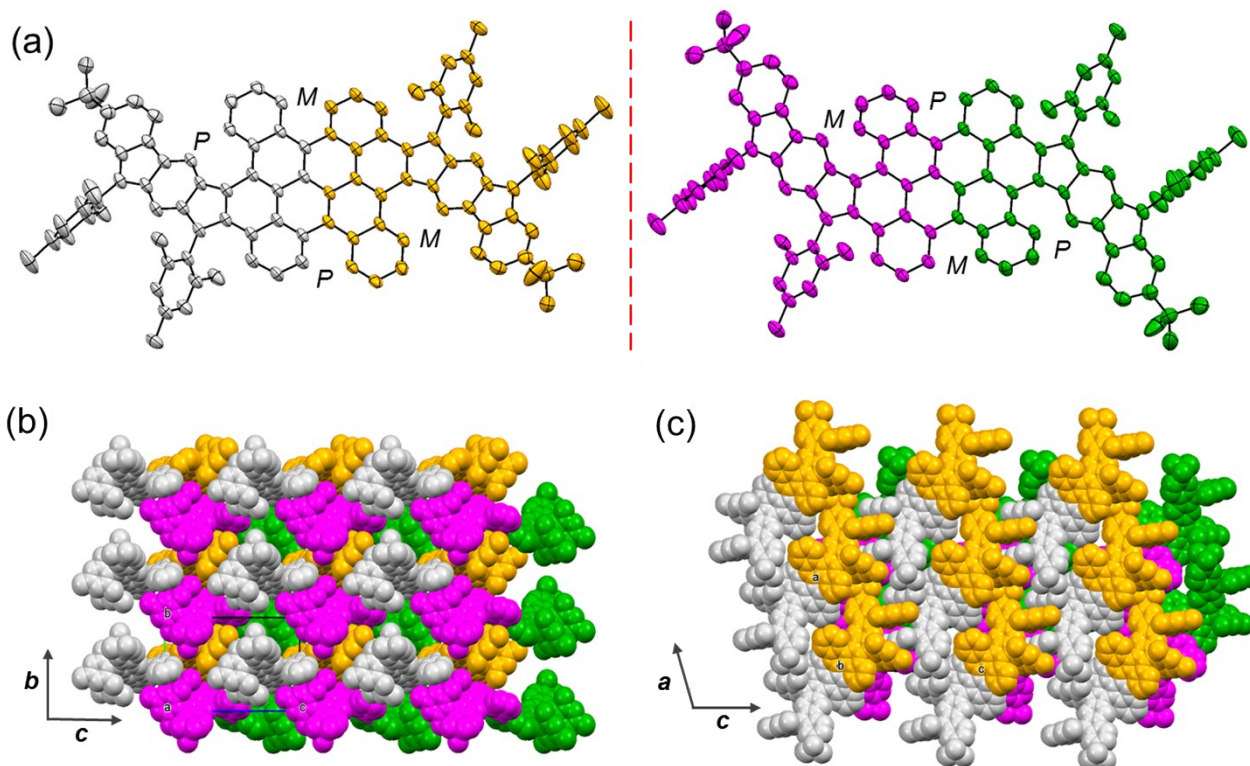

**Figure S18.** (a) Top views of the enantiomers of **2** and (b,c) the packing structure of **2**. Hydrogen atoms have been omitted for clarity.

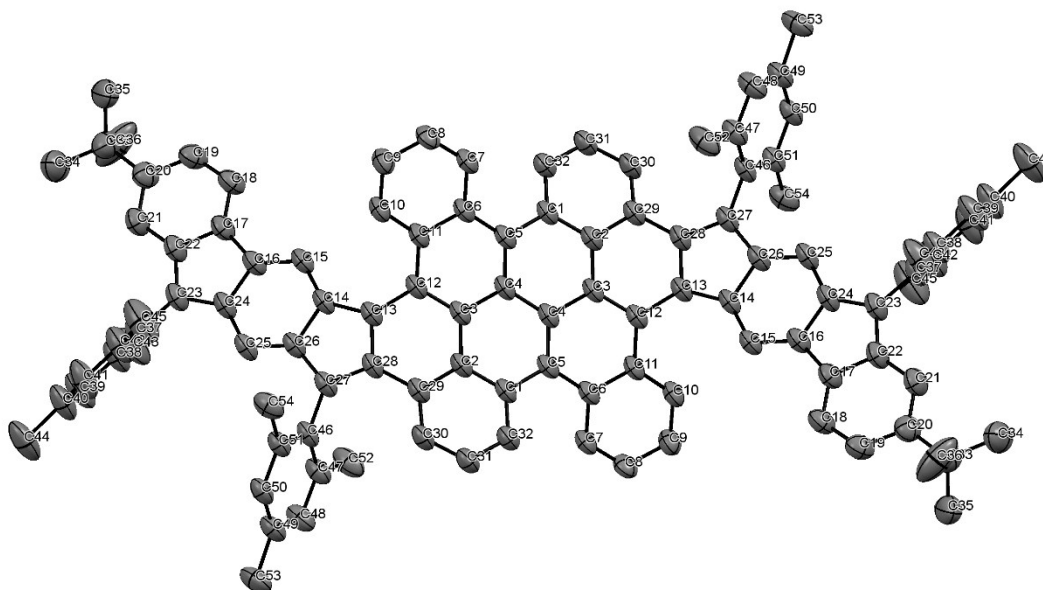

**Figure S19.** ORTEP drawing of **2** with 50% probability.

**Table S2.** Bond lengths for **2**.

| Atom | Atom            | Length/Å | Atom | Atom | Length/Å |
|------|-----------------|----------|------|------|----------|
| C1   | C2              | 1.415(3) | C22  | C23  | 1.456(3) |
| C1   | C5 <sup>1</sup> | 1.461(2) | C23  | C24  | 1.405(3) |
| C1   | C32             | 1.401(3) | C23  | C37  | 1.485(3) |

|     |                 |          |     |     |          |
|-----|-----------------|----------|-----|-----|----------|
| C2  | C3              | 1.448(3) | C24 | C25 | 1.409(3) |
| C2  | C29             | 1.428(2) | C25 | C26 | 1.370(3) |
| C3  | C4              | 1.440(2) | C26 | C27 | 1.452(3) |
| C3  | C12             | 1.408(3) | C27 | C28 | 1.390(2) |
| C4  | C4 <sup>1</sup> | 1.449(4) | C27 | C46 | 1.481(3) |
| C4  | C5              | 1.401(3) | C28 | C29 | 1.448(3) |
| C5  | C1 <sup>1</sup> | 1.461(2) | C29 | C30 | 1.390(3) |
| C5  | C6              | 1.443(3) | C30 | C31 | 1.381(3) |
| C6  | C7              | 1.423(3) | C31 | C32 | 1.384(3) |
| C6  | C11             | 1.436(2) | C33 | C34 | 1.536(4) |
| C7  | C8              | 1.367(3) | C33 | C35 | 1.506(4) |
| C8  | C9              | 1.399(3) | C33 | C36 | 1.522(4) |
| C9  | C10             | 1.366(3) | C37 | C38 | 1.399(3) |
| C10 | C11             | 1.414(3) | C37 | C42 | 1.410(3) |
| C11 | C12             | 1.434(3) | C38 | C39 | 1.395(3) |
| C12 | C13             | 1.444(2) | C38 | C43 | 1.501(4) |
| C13 | C14             | 1.412(3) | C39 | C40 | 1.386(4) |
| C13 | C28             | 1.459(3) | C40 | C41 | 1.376(4) |
| C14 | C15             | 1.415(3) | C40 | C44 | 1.516(3) |
| C14 | C26             | 1.455(2) | C41 | C42 | 1.394(4) |
| C15 | C16             | 1.371(3) | C42 | C45 | 1.512(4) |
| C16 | C17             | 1.459(3) | C46 | C47 | 1.392(3) |
| C16 | C24             | 1.447(3) | C46 | C51 | 1.406(3) |
| C17 | C18             | 1.381(3) | C47 | C48 | 1.398(3) |
| C17 | C22             | 1.425(3) | C47 | C52 | 1.509(3) |
| C18 | C19             | 1.387(4) | C48 | C49 | 1.382(3) |
| C19 | C20             | 1.407(4) | C49 | C50 | 1.376(3) |
| C20 | C21             | 1.404(3) | C49 | C53 | 1.512(3) |
| C20 | C33             | 1.534(4) | C50 | C51 | 1.398(3) |
| C21 | C22             | 1.403(3) | C51 | C54 | 1.498(3) |

<sup>1</sup>2-X,1-Y,2-Z

**Table S3.** Bond angles for **2**.

| Atom Atom Atom Angle/° |    |                 |            | Atom Atom Atom Angle/° |     |     |            |
|------------------------|----|-----------------|------------|------------------------|-----|-----|------------|
| C2                     | C1 | C5 <sup>1</sup> | 119.27(18) | C23                    | C24 | C16 | 109.39(19) |
| C32                    | C1 | C2              | 118.27(18) | C23                    | C24 | C25 | 130.31(19) |
| C32                    | C1 | C5 <sup>1</sup> | 122.35(19) | C25                    | C24 | C16 | 120.28(18) |
| C1                     | C2 | C3              | 120.33(17) | C26                    | C25 | C24 | 118.05(18) |
| C1                     | C2 | C29             | 119.31(18) | C25                    | C26 | C14 | 122.0(2)   |

|     |     |                 |            |     |     |     |            |
|-----|-----|-----------------|------------|-----|-----|-----|------------|
| C29 | C2  | C3              | 120.13(18) | C25 | C26 | C27 | 128.88(18) |
| C4  | C3  | C2              | 118.81(18) | C27 | C26 | C14 | 108.86(17) |
| C12 | C3  | C2              | 121.06(16) | C26 | C27 | C46 | 122.58(17) |
| C12 | C3  | C4              | 120.05(18) | C28 | C27 | C26 | 107.10(17) |
| C3  | C4  | C4 <sup>1</sup> | 119.4(2)   | C28 | C27 | C46 | 130.2(2)   |
| C5  | C4  | C3              | 119.78(18) | C27 | C28 | C13 | 108.98(18) |
| C5  | C4  | C4 <sup>1</sup> | 120.7(2)   | C27 | C28 | C29 | 130.0(2)   |
| C4  | C5  | C1 <sup>1</sup> | 118.94(18) | C29 | C28 | C13 | 120.52(16) |
| C4  | C5  | C6              | 118.77(16) | C2  | C29 | C28 | 116.78(18) |
| C6  | C5  | C1 <sup>1</sup> | 122.28(18) | C30 | C29 | C2  | 119.50(19) |
| C7  | C6  | C5              | 123.13(17) | C30 | C29 | C28 | 123.63(18) |
| C7  | C6  | C11             | 117.58(18) | C31 | C30 | C29 | 120.31(19) |
| C11 | C6  | C5              | 119.12(18) | C30 | C31 | C32 | 120.5(2)   |
| C8  | C7  | C6              | 121.71(18) | C31 | C32 | C1  | 121.2(2)   |
| C7  | C8  | C9              | 120.5(2)   | C20 | C33 | C34 | 111.6(2)   |
| C10 | C9  | C8              | 119.6(2)   | C35 | C33 | C20 | 110.8(3)   |
| C9  | C10 | C11             | 122.10(18) | C35 | C33 | C34 | 106.4(3)   |
| C10 | C11 | C6              | 118.39(18) | C35 | C33 | C36 | 109.8(3)   |
| C10 | C11 | C12             | 122.01(17) | C36 | C33 | C20 | 108.8(2)   |
| C12 | C11 | C6              | 119.33(18) | C36 | C33 | C34 | 109.4(3)   |
| C3  | C12 | C11             | 118.72(16) | C38 | C37 | C23 | 121.3(2)   |
| C3  | C12 | C13             | 117.42(18) | C38 | C37 | C42 | 118.8(2)   |
| C11 | C12 | C13             | 123.75(18) | C42 | C37 | C23 | 119.7(2)   |
| C12 | C13 | C28             | 118.64(18) | C37 | C38 | C43 | 121.6(2)   |
| C14 | C13 | C12             | 132.61(19) | C39 | C38 | C37 | 119.2(2)   |
| C14 | C13 | C28             | 108.61(16) | C39 | C38 | C43 | 119.2(2)   |
| C13 | C14 | C15             | 133.82(17) | C40 | C39 | C38 | 122.3(3)   |
| C13 | C14 | C26             | 106.22(18) | C39 | C40 | C44 | 122.2(3)   |
| C15 | C14 | C26             | 119.36(17) | C41 | C40 | C39 | 117.9(2)   |
| C16 | C15 | C14             | 118.49(18) | C41 | C40 | C44 | 119.9(3)   |
| C15 | C16 | C17             | 131.50(19) | C40 | C41 | C42 | 121.9(3)   |
| C15 | C16 | C24             | 121.6(2)   | C37 | C42 | C45 | 121.5(2)   |
| C24 | C16 | C17             | 106.88(18) | C41 | C42 | C37 | 119.8(2)   |
| C18 | C17 | C16             | 132.3(2)   | C41 | C42 | C45 | 118.7(3)   |
| C18 | C17 | C22             | 120.1(2)   | C47 | C46 | C27 | 120.52(18) |
| C22 | C17 | C16             | 107.58(19) | C47 | C46 | C51 | 119.94(19) |
| C17 | C18 | C19             | 119.1(2)   | C51 | C46 | C27 | 119.53(19) |
| C18 | C19 | C20             | 123.1(2)   | C46 | C47 | C48 | 119.1(2)   |
| C19 | C20 | C33             | 119.6(2)   | C46 | C47 | C52 | 121.8(2)   |
| C21 | C20 | C19             | 117.3(2)   | C48 | C47 | C52 | 119.0(2)   |

|     |     |     |            |     |     |     |            |
|-----|-----|-----|------------|-----|-----|-----|------------|
| C21 | C20 | C33 | 123.1(2)   | C49 | C48 | C47 | 121.9(2)   |
| C22 | C21 | C20 | 120.8(2)   | C48 | C49 | C53 | 120.3(2)   |
| C17 | C22 | C23 | 108.48(19) | C50 | C49 | C48 | 118.3(2)   |
| C21 | C22 | C17 | 119.6(2)   | C50 | C49 | C53 | 121.4(2)   |
| C21 | C22 | C23 | 131.9(2)   | C49 | C50 | C51 | 122.09(19) |
| C22 | C23 | C37 | 128.1(2)   | C46 | C51 | C54 | 121.46(19) |
| C24 | C23 | C22 | 107.65(18) | C50 | C51 | C46 | 118.7(2)   |
| C24 | C23 | C37 | 124.2(2)   | C50 | C51 | C54 | 119.81(19) |

<sup>1</sup>2-X,1-Y,2-Z

**Table S4.** Torsion angles for **2**.

| <b>A</b>              | <b>B</b>  | <b>C</b>  | <b>D</b>        | <b>Angle/°</b>  | <b>A</b> | <b>B</b> | <b>C</b> | <b>D</b> | <b>Angle/°</b> |
|-----------------------|-----------|-----------|-----------------|-----------------|----------|----------|----------|----------|----------------|
| C1                    | C2        | C3        | C4              | -1.6(3)         | C19      | C20      | C21      | C22      | 0.1(4)         |
| C1                    | C2        | C3        | C12             | -178.48(17)     | C19      | C20      | C33      | C34      | -169.0(3)      |
| C1                    | C2        | C29       | C28             | -166.96(17)     | C19      | C20      | C33      | C35      | -50.7(4)       |
| C1                    | C2        | C29       | C30             | 9.7(3)          | C19      | C20      | C33      | C36      | 70.1(4)        |
| <b>C1<sup>1</sup></b> | <b>C5</b> | <b>C6</b> | <b>C7</b>       | <b>-22.1(3)</b> | C20      | C21      | C22      | C17      | 1.0(4)         |
| C1 <sup>1</sup>       | C5        | C6        | C11             | 162.84(17)      | C20      | C21      | C22      | C23      | -179.2(2)      |
| C2                    | C1        | C32       | C31             | 4.3(3)          | C21      | C20      | C33      | C34      | 14.1(4)        |
| C2                    | C3        | C4        | C4 <sup>1</sup> | 9.5(3)          | C21      | C20      | C33      | C35      | 132.4(3)       |
| C2                    | C3        | C4        | C5              | -173.84(17)     | C21      | C20      | C33      | C36      | -106.8(4)      |
| C2                    | C3        | C12       | C11             | 159.11(17)      | C21      | C22      | C23      | C24      | -179.8(2)      |
| C2                    | C3        | C12       | C13             | -17.1(3)        | C21      | C22      | C23      | C37      | -0.8(4)        |
| C2                    | C29       | C30       | C31             | -2.8(3)         | C22      | C17      | C18      | C19      | 0.9(4)         |
| C3                    | C2        | C29       | C28             | 18.5(3)         | C22      | C23      | C24      | C16      | 0.9(2)         |
| C3                    | C2        | C29       | C30             | -164.85(18)     | C22      | C23      | C24      | C25      | -177.8(2)      |
| C3                    | C4        | C5        | C1 <sup>1</sup> | -166.19(17)     | C22      | C23      | C37      | C38      | 71.6(4)        |
| C3                    | C4        | C5        | C6              | 15.1(3)         | C22      | C23      | C37      | C42      | -113.9(3)      |
| C3                    | C12       | C13       | C14             | -152.2(2)       | C23      | C24      | C25      | C26      | -179.5(2)      |
| C3                    | C12       | C13       | C28             | 23.0(3)         | C23      | C37      | C38      | C39      | 177.1(3)       |
| C4                    | C3        | C12       | C11             | -17.7(3)        | C23      | C37      | C38      | C43      | -2.9(4)        |
| C4                    | C3        | C12       | C13             | 166.10(16)      | C23      | C37      | C42      | C41      | -177.2(3)      |
| C4 <sup>1</sup>       | C4        | C5        | C1 <sup>1</sup> | 10.4(3)         | C23      | C37      | C42      | C45      | 3.5(5)         |
| C4 <sup>1</sup>       | C4        | C5        | C6              | -168.3(2)       | C24      | C16      | C17      | C18      | -178.0(2)      |
| C4                    | C5        | C6        | C7              | 156.58(19)      | C24      | C16      | C17      | C22      | 1.4(2)         |
| C4                    | C5        | C6        | C11             | -18.5(3)        | C24      | C23      | C37      | C38      | -109.5(3)      |
| C5 <sup>1</sup>       | C1        | C2        | C3              | -12.1(3)        | C24      | C23      | C37      | C42      | 65.0(4)        |
| C5 <sup>1</sup>       | C1        | C2        | C29             | 173.34(17)      | C24      | C25      | C26      | C14      | 1.7(3)         |
| C5 <sup>1</sup>       | C1        | C32       | C31             | -179.45(19)     | C24      | C25      | C26      | C27      | -171.90(19)    |



|            |            |            |                 |                |     |     |     |     |             |
|------------|------------|------------|-----------------|----------------|-----|-----|-----|-----|-------------|
| C5         | C6         | C7         | C8              | -179.3(2)      | C25 | C26 | C27 | C28 | 173.2(2)    |
| C5         | C6         | C11        | C10             | 178.01(17)     | C25 | C26 | C27 | C46 | -2.6(3)     |
| C5         | C6         | C11        | C12             | 3.9(3)         | C26 | C14 | C15 | C16 | 3.2(3)      |
| C6         | C7         | C8         | C9              | 2.0(3)         | C26 | C27 | C28 | C13 | 3.7(2)      |
| C6         | C11        | C12        | C3              | 14.0(3)        | C26 | C27 | C28 | C29 | -168.26(19) |
| C6         | C11        | C12        | C13             | -169.98(17)    | C26 | C27 | C46 | C47 | 104.5(2)    |
| C7         | C6         | C11        | C10             | 2.7(3)         | C26 | C27 | C46 | C51 | -74.1(3)    |
| C7         | C6         | C11        | C12             | -171.45(18)    | C27 | C28 | C29 | C2  | 158.95(19)  |
| C7         | C8         | C9         | C10             | 1.8(4)         | C27 | C28 | C29 | C30 | -17.5(3)    |
| C8         | C9         | C10        | C11             | -3.2(3)        | C27 | C46 | C47 | C48 | -179.9(2)   |
| C9         | C10        | C11        | C6              | 0.9(3)         | C27 | C46 | C47 | C52 | 1.1(3)      |
| C9         | C10        | C11        | C12             | 174.9(2)       | C27 | C46 | C51 | C50 | 178.94(19)  |
| C10        | C11        | C12        | C3              | -159.85(18)    | C27 | C46 | C51 | C54 | -3.7(3)     |
| C10        | C11        | C12        | C13             | 16.1(3)        | C28 | C13 | C14 | C15 | -166.5(2)   |
| C11        | C6         | C7         | C8              | -4.2(3)        | C28 | C13 | C14 | C26 | 4.2(2)      |
| <b>C11</b> | <b>C12</b> | <b>C13</b> | <b>C14</b>      | <b>31.8(3)</b> | C28 | C27 | C46 | C47 | -70.2(3)    |
| C11        | C12        | C13        | C28             | -152.99(18)    | C28 | C27 | C46 | C51 | 111.2(3)    |
| C12        | C3         | C4         | C4 <sup>1</sup> | -173.6(2)      | C28 | C29 | C30 | C31 | 173.6(2)    |
| C12        | C3         | C4         | C5              | 3.0(3)         | C29 | C2  | C3  | C4  | 172.82(16)  |
| C12        | C13        | C14        | C15             | 9.1(4)         | C29 | C2  | C3  | C12 | -4.0(3)     |
| C12        | C13        | C14        | C26             | 179.8(2)       | C29 | C30 | C31 | C32 | -3.3(3)     |
| C12        | C13        | C28        | C27             | 178.67(17)     | C30 | C31 | C32 | C1  | 2.6(3)      |
| C12        | C13        | C28        | C29             | -8.5(3)        | C32 | C1  | C2  | C3  | 164.24(17)  |
| C13        | C14        | C15        | C16             | 173.0(2)       | C32 | C1  | C2  | C29 | -10.3(3)    |
| C13        | C14        | C26        | C25             | -176.74(19)    | C33 | C20 | C21 | C22 | 177.1(2)    |
| C13        | C14        | C26        | C27             | -2.0(2)        | C37 | C23 | C24 | C16 | -178.2(2)   |
| C13        | C28        | C29        | C2              | -12.2(3)       | C37 | C23 | C24 | C25 | 3.2(4)      |
| C13        | C28        | C29        | C30             | 171.32(19)     | C37 | C38 | C39 | C40 | -0.9(5)     |
| C14        | C13        | C28        | C27             | -5.1(2)        | C38 | C37 | C42 | C41 | -2.6(5)     |
| C14        | C13        | C28        | C29             | 167.77(17)     | C38 | C37 | C42 | C45 | 178.1(3)    |
| C14        | C15        | C16        | C17             | 179.7(2)       | C38 | C39 | C40 | C41 | -0.6(6)     |
| C14        | C15        | C16        | C24             | 0.4(3)         | C38 | C39 | C40 | C44 | -178.4(3)   |
| C14        | C26        | C27        | C28             | -1.1(2)        | C39 | C40 | C41 | C42 | 0.5(6)      |
| C14        | C26        | C27        | C46             | -176.84(17)    | C40 | C41 | C42 | C37 | 1.1(6)      |
| C15        | C14        | C26        | C25             | -4.4(3)        | C40 | C41 | C42 | C45 | -179.6(4)   |
| C15        | C14        | C26        | C27             | 170.30(17)     | C42 | C37 | C38 | C39 | 2.5(4)      |
| C15        | C16        | C17        | C18             | 2.5(4)         | C42 | C37 | C38 | C43 | -177.5(3)   |
| C15        | C16        | C17        | C22             | -178.0(2)      | C43 | C38 | C39 | C40 | 179.1(3)    |
| C15        | C16        | C24        | C23             | 178.0(2)       | C44 | C40 | C41 | C42 | 178.3(4)    |
| C15        | C16        | C24        | C25             | -3.1(3)        | C46 | C27 | C28 | C13 | 179.01(19)  |

|     |     |     |     |            |     |     |     |     |           |
|-----|-----|-----|-----|------------|-----|-----|-----|-----|-----------|
| C16 | C17 | C18 | C19 | -179.6(2)  | C46 | C27 | C28 | C29 | 7.1(3)    |
| C16 | C17 | C22 | C21 | 178.9(2)   | C46 | C47 | C48 | C49 | 0.5(4)    |
| C16 | C17 | C22 | C23 | -0.9(2)    | C47 | C46 | C51 | C50 | 0.3(3)    |
| C16 | C24 | C25 | C26 | 2.0(3)     | C47 | C46 | C51 | C54 | 177.7(2)  |
| C17 | C16 | C24 | C23 | -1.4(2)    | C47 | C48 | C49 | C50 | 1.3(4)    |
| C17 | C16 | C24 | C25 | 177.37(19) | C47 | C48 | C49 | C53 | -178.3(3) |
| C17 | C18 | C19 | C20 | 0.2(4)     | C48 | C49 | C50 | C51 | -2.3(4)   |
| C17 | C22 | C23 | C24 | 0.0(3)     | C49 | C50 | C51 | C46 | 1.5(3)    |
| C17 | C22 | C23 | C37 | 179.0(2)   | C49 | C50 | C51 | C54 | -175.9(2) |
| C18 | C17 | C22 | C21 | -1.5(3)    | C51 | C46 | C47 | C48 | -1.3(3)   |
| C18 | C17 | C22 | C23 | 178.6(2)   | C51 | C46 | C47 | C52 | 179.7(2)  |
| C18 | C19 | C20 | C21 | -0.8(4)    | C52 | C47 | C48 | C49 | 179.6(3)  |
| C18 | C19 | C20 | C33 | -177.9(2)  | C53 | C49 | C50 | C51 | 177.3(2)  |

<sup>12</sup>-X,1-Y,2-Z

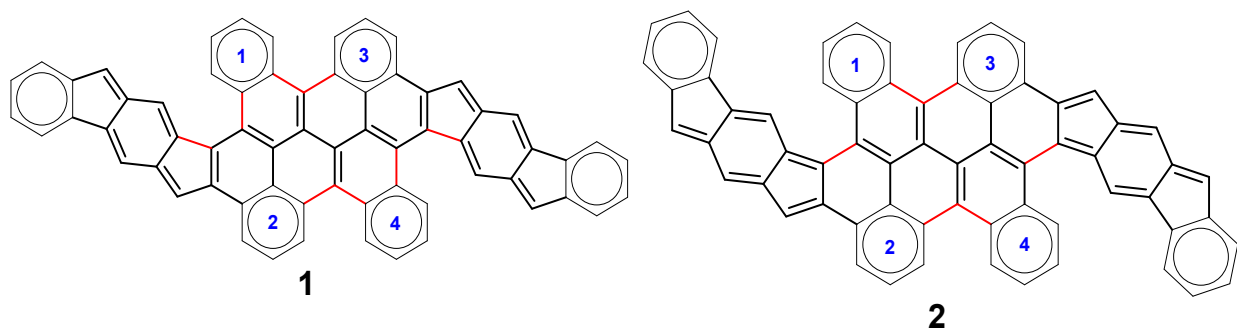

**Figure S20.** The resonance structures of **1** and **2**.

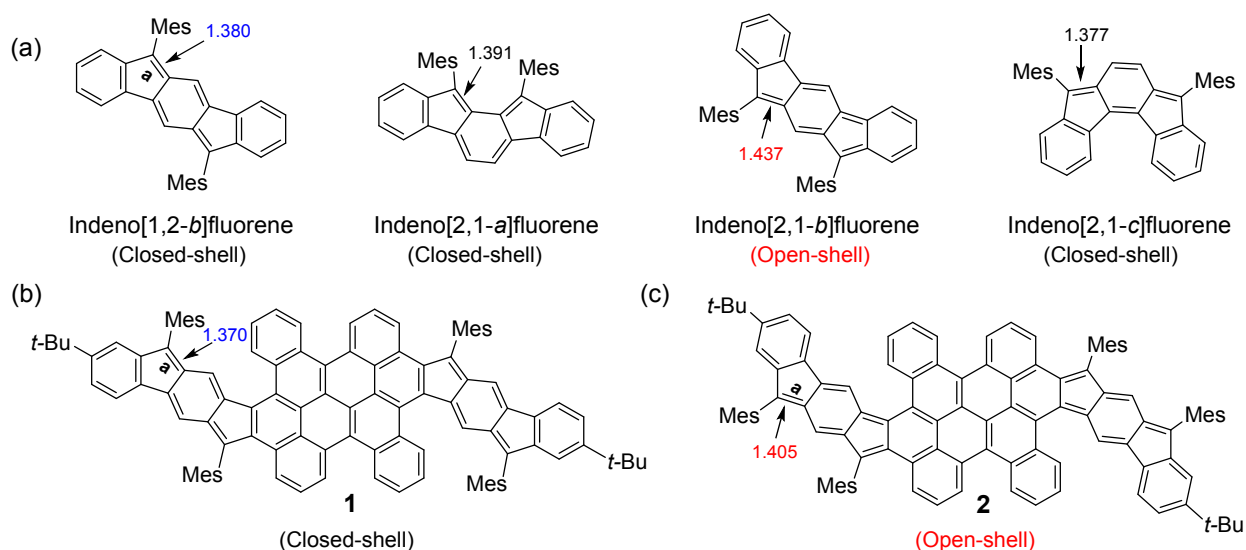

**Figure S21.** Comparison of the length of the most critical bond *a* of (a) the indenofluorene isomers <sup>a</sup>, (b) compound **1** (Calculated at UCAM-B3LYP/6-311G\*\* level) and (c) compound **2** (from the single crystal structure).

<sup>a</sup> data from Nat. Chem. 2016, 8, 753-759.

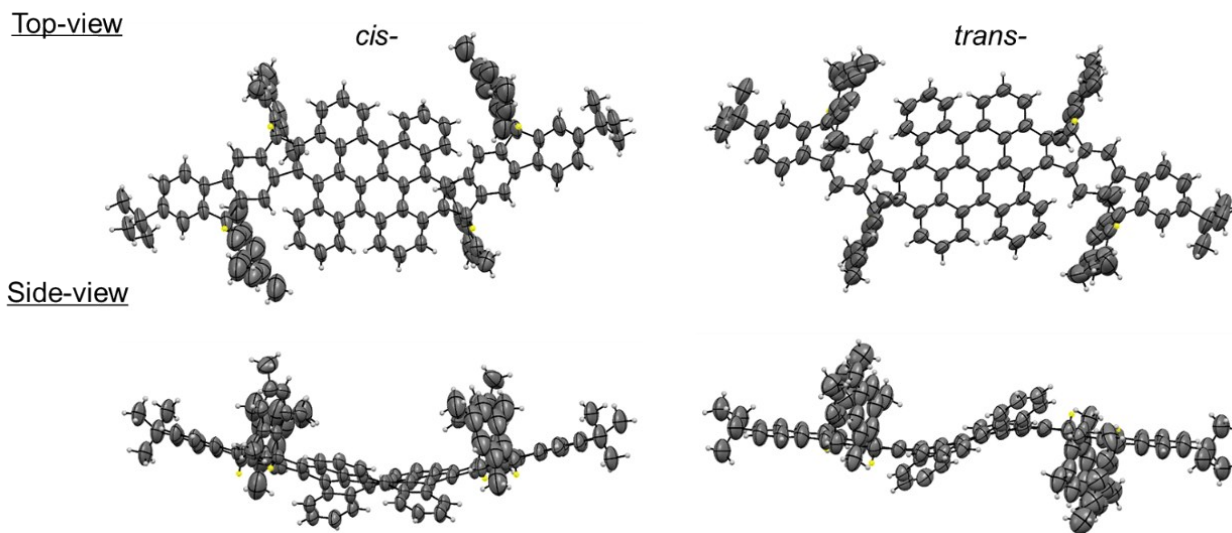

**Figure S22.** The *cis-trans* conformation in the crystal structure of tetrahydro-precursor **9**. The tertiary hydrogen atoms are colored yellow for a better visualization.

## 7. DFT calculations

Density functional theory (DFT) calculations were performed at the UCAM-B3LYP/6-311G\*\* level of theory as implemented in Gaussian09 for structure relaxation as well as calculation of the singlet-triplet energy gap  $\Delta E_{S-T}$ .<sup>[4,5]</sup> NICS values were calculated at the same level of theory using the standard GIAO procedure (NMR pop=NCSall).<sup>[6]</sup> The diradical character  $y_0$  and the tetraradical character  $y_1$  are evaluated from CASSCF(4,4)/6-31G\*\* calculations by  $y_0 = n_{LUNO}$  and  $y_1 = n_{LUNO} + 1$  with  $n_{LUNO}$  the occupation of the lowest unoccupied natural orbital and  $n_{LUNO} + 1$  the occupation number of the unoccupied natural orbital.<sup>[7]</sup> AICD plot was calculated by using the method developed by Herges based on the optimized ground-state geometries at a UB3LYP/6-31G\* level of theory.<sup>[8]</sup>

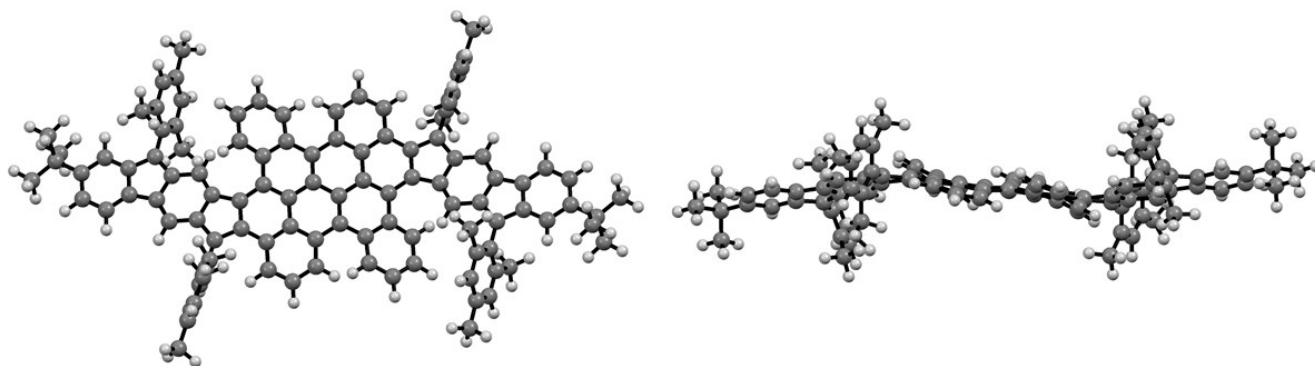

**Figure S23.** The optimized structure (UB3LYP/6-31G\*) of compound **1** in the ground state.

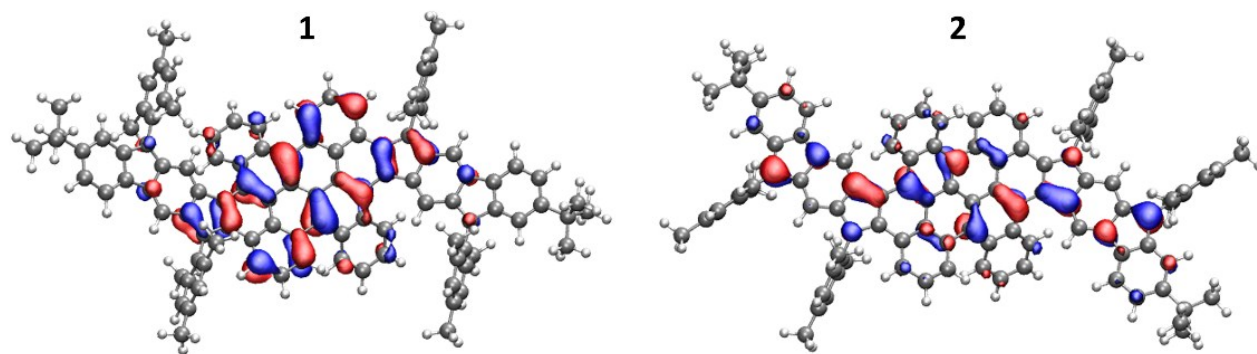

**Figure S24.** HOMO orbitals of compounds **1** and **2** in the closed-shell singlet state.

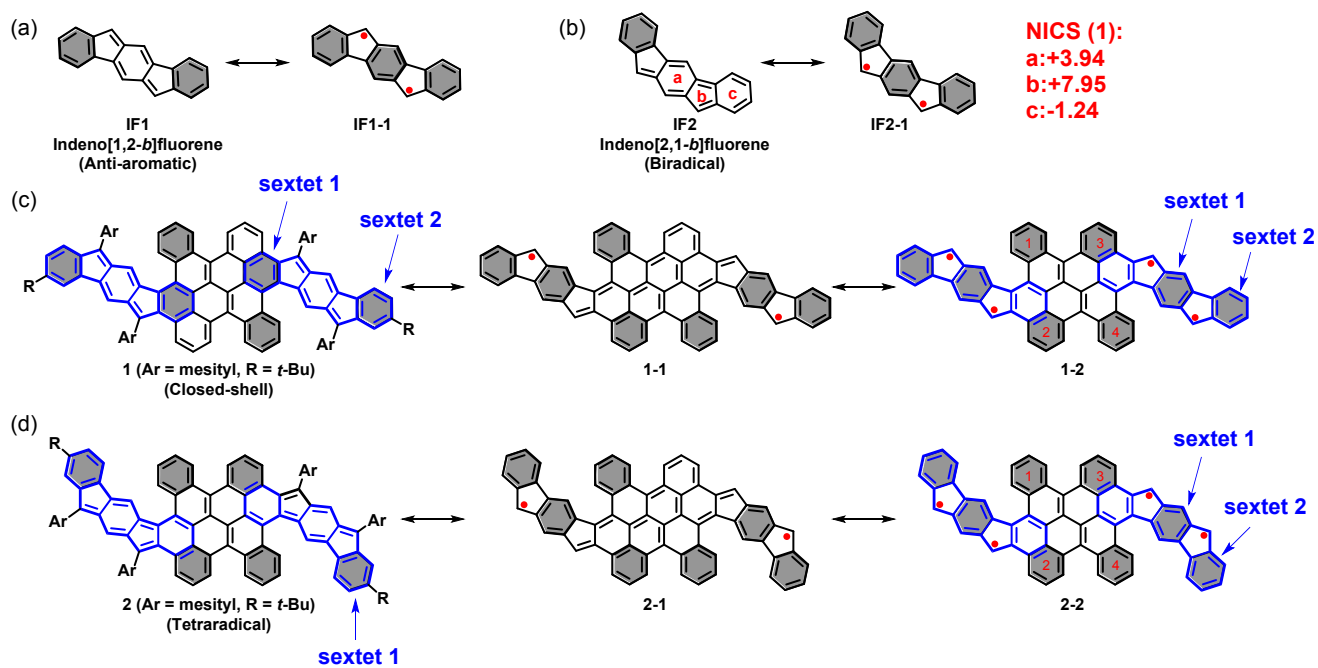

**Figure S25.** Resonance structures of the studied indeno[1,2-*b*]fluorene<sup>[9]</sup> (a), indeno[2,1-*b*]fluorene<sup>[10]</sup> (b) (NICS (1) values are from the SI of *J. Org. Chem.*, **2017**, 82, 1380) and the  $\pi$ -extended stable wavy-shaped PHs **1** (c) and **2** (d) reported in this work. The flanked indeno[1,2-*b*]fluorene and indeno[2,1-*b*]fluorene in **1** and **2** are respectively highlighted by blue color.

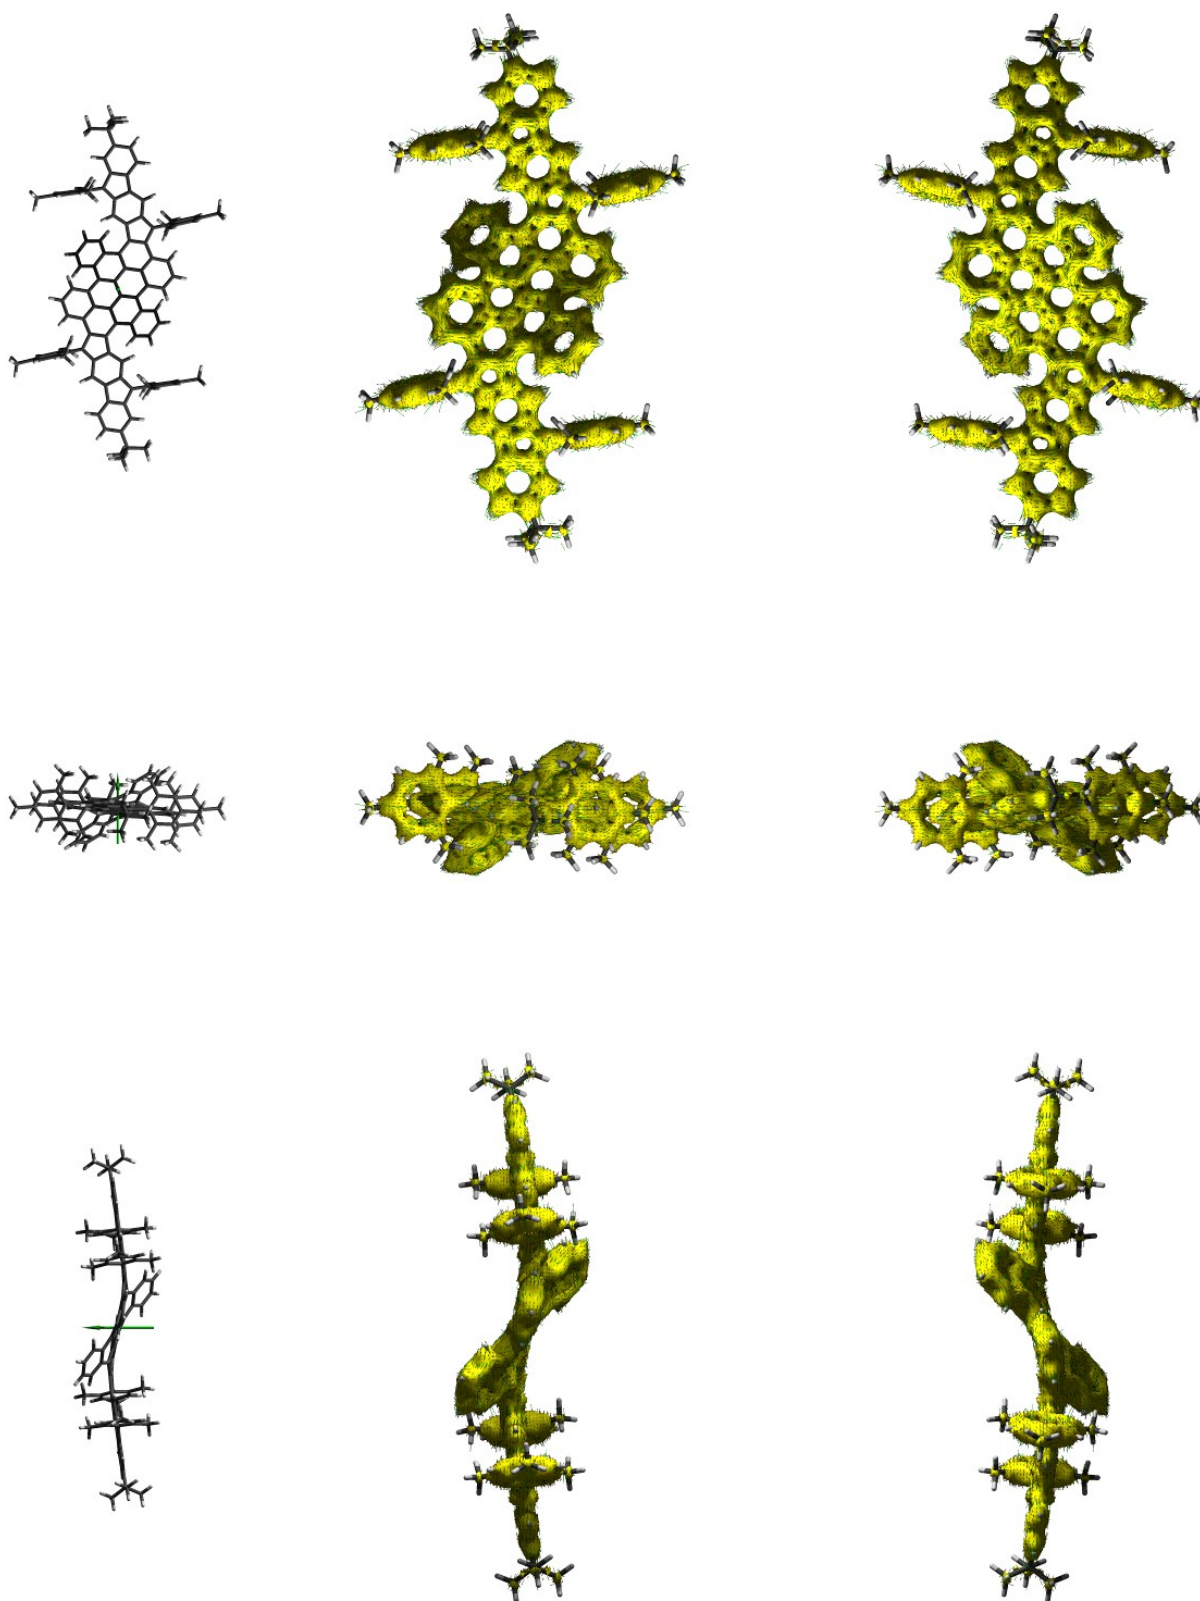

**Figure S26.** ACID plots of **1** viewed from different angles. The green arrow indicates the magnetic field. Isovalue is 0.05.

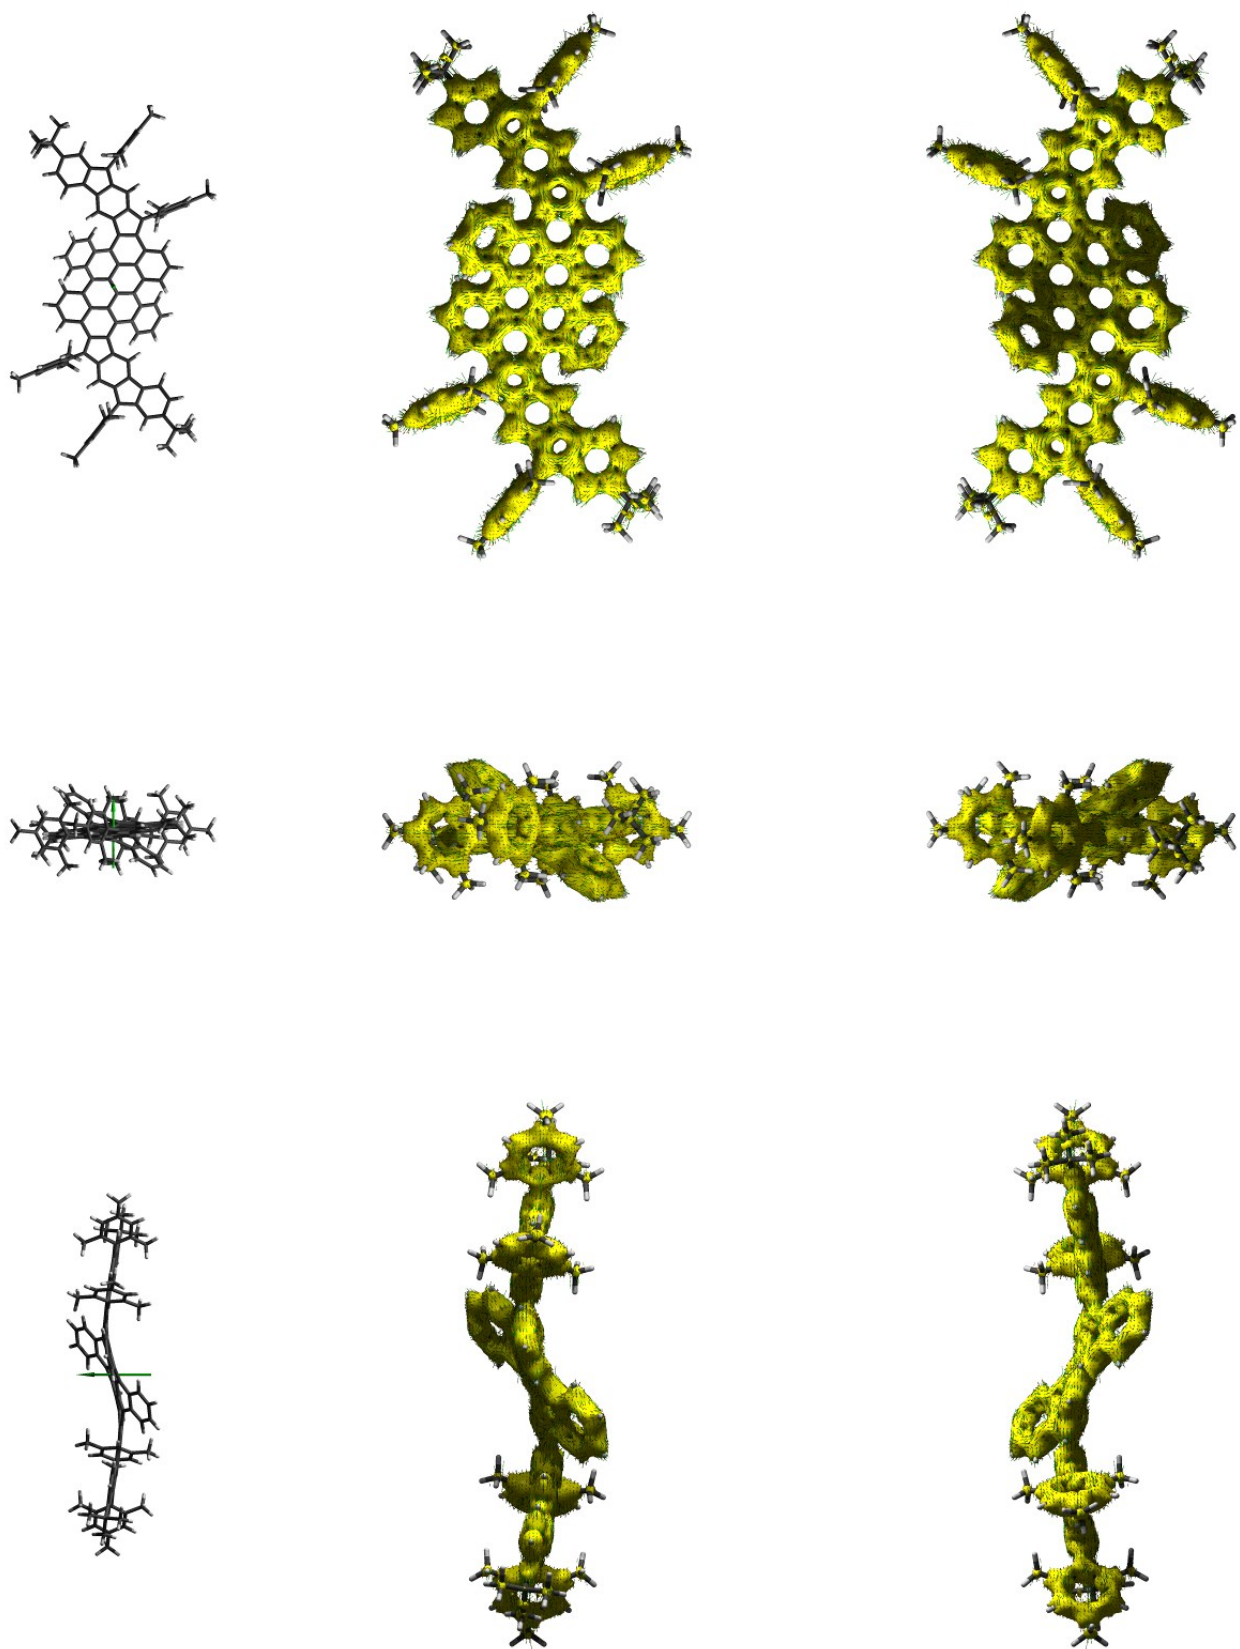

**Figure S27.** ACID plots of **2** viewed from different angles. The green arrow indicates the magnetic field. Isovalue is 0.05.

For transition state (TS) calculation all the structure were optimized in gas phase by using B3LYP level of density functional theory with the 6-31G\* basis. To confirm the accuracy of the transition state we did frequency calculation. The Gibbs free energies of reaction ( $\Delta_r G^\circ$ ) at room temperature (298 K) can be calculated by the following equations<sup>[11]</sup>

$$H_{\text{corr}} = E_{\text{tot}} + k_B T$$

$$G_{\text{corr}} = H_{\text{corr}} - T S_{\text{tot}}$$

$$\Delta_r G^\circ (T) = \sum (\epsilon_0 + G_{\text{corr}})_{\text{products}} - \sum (\epsilon_0 + G_{\text{corr}})_{\text{reactants}}$$

where  $H_{\text{corr}}$  is the thermal correction to Enthalpy;  $E_{\text{tot}}$  is the correction to the internal thermal energy;  $k_B$  is the Boltzmann constant;  $T$  is the temperature;  $G_{\text{corr}}$  is the thermal correction to Gibbs free energy (thermal Free Energies);  $S_{\text{tot}}$  is the correction to the internal Entropy;  $\epsilon_0$  is the total electronic energy. In our case, the product is the transition state and the reactant is the starting state.

Initiated by the dynamic process observed in the VT <sup>1</sup>H NMR measurements, the isomerization process in the quadruple helicenes **1** and **2** were evaluated. DFT calculation on the relative energies of the inversion of [4]helicene and [7]helicene substructures as well as the transition state (TS) were performed at the B3LYP/6-31G+ (d) level. From the DTF calculations, it is estimated that the transition state of [7]helicene subunits in **1** and **2** (Figure S29,  $\Delta G^\ddagger = 17.4$  kcal/mol for TS- PH1-B and  $\Delta G^\ddagger = 19.8$  kcal/mol for TS- PH2-B) hold the larger inversion barrier than that of the [4]helicene subunits in **1** and **2** (Figure S28,  $\Delta G^\ddagger = 12.1$  kcal/mol for TS- PH1-A and  $\Delta G^\ddagger = 12.8$  kcal/mol for TS- PH2-A). Therefore, we could observe their thermodynamic inversion process at the low temperature NMR measurements (Figure S11 and S12). In addition, the inversion of single helical substructures in quadruple helicenes **1** and **2** as well as the transition state (TS) was also performed at the B3LYP/6-31G\* level for the comparison (Figure S30). As expected, the inversion energy barrier of the helical substructures ([4]helicene or [7]helicene) in **1** and **2** are higher than that of the single [4]helicenes and [7]helicene (TS- PH2-A:  $\Delta G^\ddagger = 12.8$  kcal/mol > TS- PH1-A:  $\Delta G^\ddagger = 12.1$  kcal/mol > TS- [4]helicene:  $\Delta G^\ddagger = 3.8$  kcal/mol; TS- PH1-B:  $\Delta G^\ddagger = 17.4$  kcal/mol > TS- PH1-[7]helicene:  $\Delta G^\ddagger = 12.7$  kcal/mol; TS- PH2-B:  $\Delta G^\ddagger = 19.8$  kcal/mol > TS- PH2-[7]helicene:  $\Delta G^\ddagger = 12.9$  kcal/mol), which reflects the presence of additional repulsion from the neighboring helicene subunit at the transition state. Due to the lower isomerization barriers among the isomers, we could only observe them at low temperatures. Hence, it is difficult to separate them by chiral HPLC.

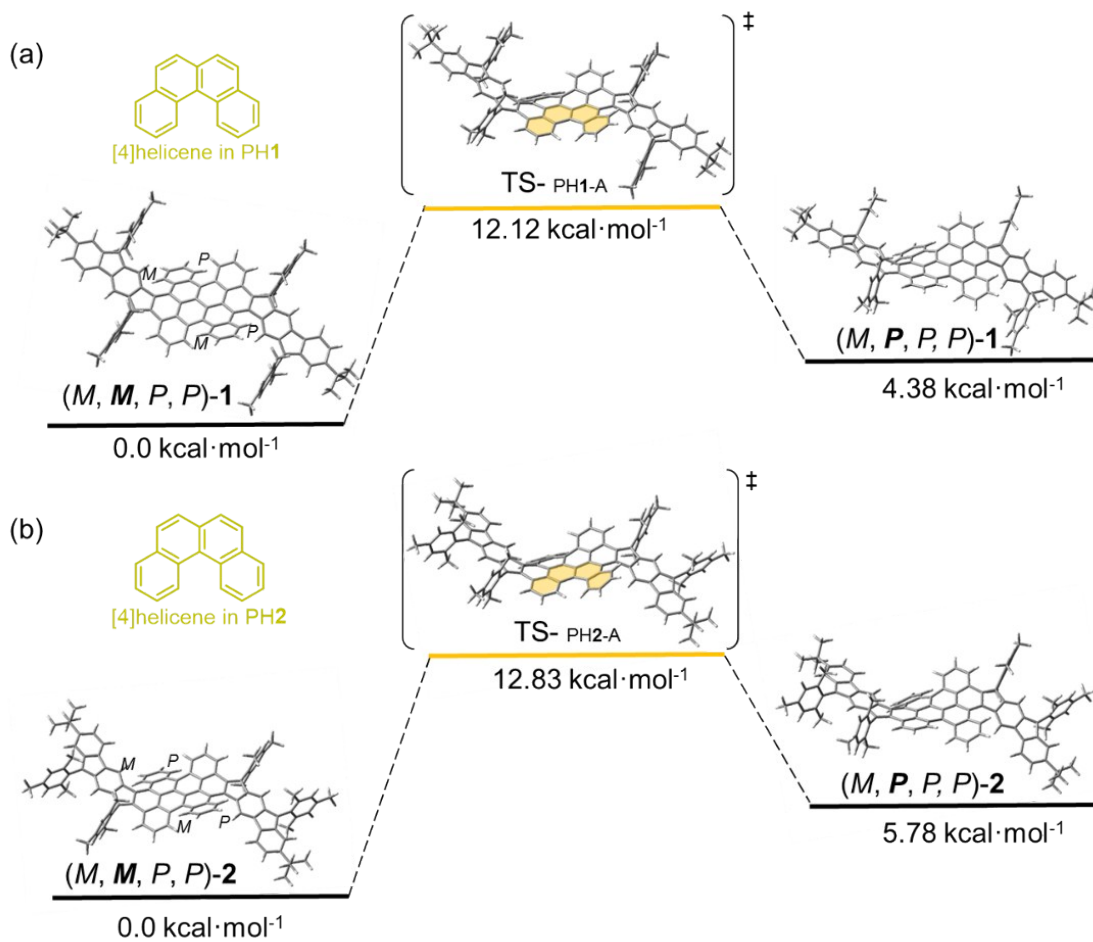

**Figure S28.** Isomerization between (*M, M, P, P*)-isomer and (*M, P, P, P*)-isomer in PH1 (a) and PH2 (b)-inversion of [4]helicene subunit.



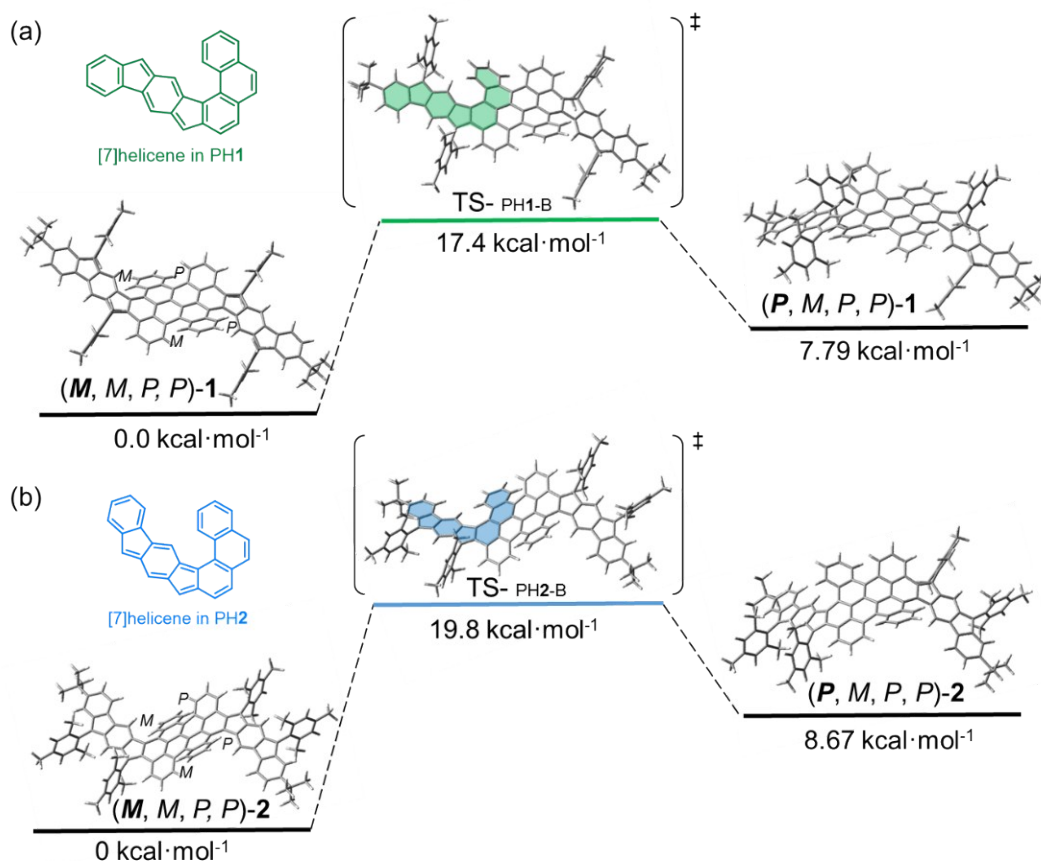

**Figure S29.** Isomerization between (*M, M, P, P*)-isomer and (*P, M, P, P*)-isomer in PH1 (a) and PH2 (b)-inversion of [7]helicene subunit.

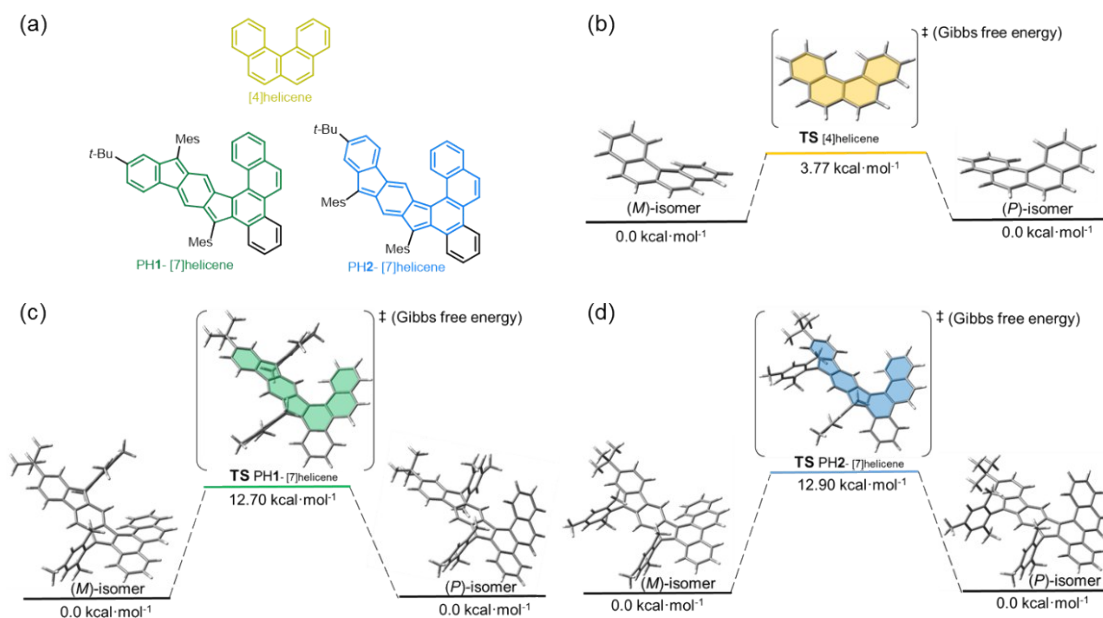

**Figure S30.** (a) The single helical substructures in quadruple helicenes **1** and **2**. Racemization process of the subunits of (b) [4]helicene, (c) [7]helicene in PH1 and (d) [7]helicene in PH2.

**Table S5.** Energy and Cartesian coordinates of optimized species

|                                                           |          |          |          |          |          |          |          |          |           |          |          |
|-----------------------------------------------------------|----------|----------|----------|----------|----------|----------|----------|----------|-----------|----------|----------|
| (M, M, P, P)-1                                            | H        | -4.95552 | 2.96286  | -3.61273 | H        | 5.45831  | 4.93182  | -3.08697 |           |          |          |
| Sum of electronic and thermal Free Energies: -4166.044659 | C        | 0.03418  | 3.93302  | 0.03621  | C        | 6.36693  | 8.76111  | 0.00141  |           |          |          |
| a.u.                                                      | H        | -0.97475 | 4.31372  | -0.03814 | H        | 7.41665  | 8.91819  | -0.27837 |           |          |          |
| C                                                         | 3.08281  | -1.17575 | 1.37316  | C        | 3.01306  | -3.56866 | 2.87143  | H        | 6.19      | 9.27561  | 0.95105  |
| C                                                         | 1.75457  | 0.63936  | 0.37952  | C        | -5.5394  | -4.5181  | -0.33244 | H        | 5.74136   | 9.2289   | -0.76661 |
| C                                                         | 3.03358  | 0.13352  | 0.75059  | C        | 5.85412  | 6.50032  | -1.02365 | C        | -5.67569  | -4.63436 | -2.86805 |
| C                                                         | 1.9504   | -2.04554 | 1.27811  | H        | 5.89143  | 6.96991  | -2.00183 | H        | -6.42972  | -3.84589 | -2.96661 |
| C                                                         | -4.15081 | -1.0063  | -0.61415 | C        | 6.06248  | 7.27776  | 0.12166  | H        | -5.84064  | -5.37674 | -3.65459 |
| C                                                         | -1.75374 | -0.63897 | -0.38152 | C        | 5.59321  | 5.12966  | -0.93918 | H        | -4.69473  | -4.17104 | -3.02583 |
| C                                                         | -1.56237 | -2.04505 | -0.18409 | C        | -1.94392 | 3.22878  | -2.0702  | C        | 5.67431   | 4.63494  | 2.86781  |
| C                                                         | 0.63332  | -0.25692 | 0.24425  | H        | -1.05086 | 3.83576  | -2.09011 | H        | 4.69303   | 4.17201  | 3.02476  |
| C                                                         | -3.03289 | -0.13315 | -0.75213 | C        | 5.54068  | 4.5182   | 0.33208  | H        | 5.83879   | 5.37741  | 3.65436  |
| C                                                         | 1.56332  | 2.04541  | 0.18188  | C        | 5.60709  | 0.75711  | 0.51758  | H        | 6.42797   | 3.84623  | 2.96722  |
| C                                                         | -5.60633 | -0.757   | -0.51782 | C        | 5.26809  | 3.06152  | 0.44102  | C        | -6.365    | -8.76113 | -0.00168 |
| C                                                         | 0.78745  | -1.62462 | 0.51987  | C        | -5.74895 | -5.28473 | -1.49703 | H        | -7.41377  | -8.91834 | 0.28155  |
| C                                                         | 1.94408  | -3.2283  | 2.06854  | C        | -5.26701 | -3.06139 | -0.44145 | H        | -5.73685  | -9.22945 | 0.76392  |
| H                                                         | 1.0511   | -3.83541 | 2.08789  | C        | -7.6657  | -2.20444 | -0.29156 | H        | -6.1913   | -9.27504 | -0.95223 |
| C                                                         | -0.26214 | -2.55597 | 0.12089  | H        | -8.1096  | -3.19368 | -0.26109 | C        | -5.34545  | -4.30996 | 2.19315  |
| C                                                         | 4.15156  | 1.00657  | 0.61294  | C        | 5.74907  | 5.28504  | 1.49674  | H        | -4.33456  | -3.88606 | 2.18377  |
| C                                                         | 4.14868  | -1.53883 | 2.23606  | C        | 1.08318  | 4.81069  | 0.32127  | H        | -5.45352  | -4.93234 | 3.08645  |
| H                                                         | 4.96503  | -0.84484 | 2.36989  | H        | 0.87618  | 5.86781  | 0.44059  | H        | -6.05198  | -3.47558 | 2.25788  |
| C                                                         | -3.08239 | 1.17625  | -1.3744  | C        | 6.24837  | 2.07898  | 0.44551  | C        | 8.72485   | -1.23826 | -0.03702 |
| C                                                         | -0.03308 | -3.93258 | -0.03876 | C        | 6.00418  | 6.6558   | 1.37258  | C        | 7.7629    | -0.25483 | 0.15649  |
| H                                                         | 0.97588  | -4.31321 | 0.03559  | H        | 6.15765  | 7.24659  | 2.27019  | C        | 8.40807   | 1.06712  | 0.16531  |
| C                                                         | -0.63247 | 0.25732  | -0.24644 | C        | -1.08205 | -4.81028 | -0.32387 | C        | -8.72416  | 1.2378   | 0.03857  |
| C                                                         | -0.7866  | 1.62503  | -0.52205 | H        | -0.875   | -5.86737 | -0.44336 | C        | -7.76209  | 0.25458  | -0.15519 |
| C                                                         | -2.64806 | -2.96137 | -0.39012 | C        | -3.01341 | 3.56937  | -2.87233 | C        | -8.40698  | -1.06755 | -0.16286 |
| C                                                         | -1.94986 | 2.04597  | -1.27984 | C        | -6.06085 | -7.27773 | -0.12201 | C        | -9.84496  | -0.82919 | 0.02791  |
| C                                                         | -6.24737 | -2.07897 | -0.44508 | C        | -2.38304 | -4.34566 | -0.44404 | C        | -10.03097 | 0.57962  | 0.14998  |
| C                                                         | 3.96306  | 2.40175  | 0.49776  | H        | -3.20141 | -5.03086 | -0.6082  | C        | -11.30164 | 1.12583  | 0.33345  |
| C                                                         | 2.64906  | 2.96169  | 0.38806  | C        | -6.00387 | -6.65553 | -1.37287 | C        | -12.42075 | 0.28001  | 0.40626  |
| C                                                         | -3.96212 | -2.40147 | -0.49917 | H        | -6.15826 | -7.24615 | -2.27043 | C        | -12.21819 | -1.11015 | 0.28674  |
| C                                                         | -4.1488  | 1.53958  | -2.23653 | C        | 6.34599  | -0.37796 | 0.32477  | C        | -10.94847 | -1.67011 | 0.09762  |
| H                                                         | -4.96525 | 0.84566  | -2.36999 | H        | 5.89486  | -1.36235 | 0.30067  | H        | -11.40631 | 2.19957  | 0.4138   |
| C                                                         | 0.26312  | 2.55637  | -0.12328 | C        | -5.5906  | -5.12981 | 0.93876  | H        | -10.83887 | -2.74522 | 0.00722  |
| C                                                         | -6.34536 | 0.37798  | -0.32488 | C        | -5.85136 | -6.50049 | 1.02324  | C        | 9.8462    | 0.82843  | -0.02403 |
| H                                                         | -5.89443 | 1.36249  | -0.30154 | H        | -5.88767 | -6.97027 | 2.00137  | C        | 10.03198  | -0.58038 | -0.14662 |
| C                                                         | 4.13173  | -2.71831 | 2.95122  | C        | 7.66689  | 2.20417  | 0.29337  | C        | 11.30281  | -1.12683 | -0.3283  |
| H                                                         | 4.9545   | -2.9617  | 3.6132   | H        | 8.11103  | 3.19333  | 0.26342  | C        | 12.42224  | -0.28128 | -0.39918 |
| C                                                         | 2.38412  | 4.346    | 0.4417   | C        | 5.34929  | 4.3096   | -2.19367 | C        | 12.21989  | 1.10888  | -0.27933 |
| H                                                         | 3.20252  | 5.03117  | 0.6059   | H        | 4.33838  | 3.88574  | -2.18525 | C        | 10.95005  | 1.66908  | -0.09171 |
| C                                                         | -4.13227 | 2.71921  | -2.95144 | H        | 6.05585  | 3.47518  | -2.25754 | H        | 11.40738  | -2.20059 | -0.40855 |

|   |          |          |          |                                              |              |          |          |   |          |          |          |
|---|----------|----------|----------|----------------------------------------------|--------------|----------|----------|---|----------|----------|----------|
| H | 10.84062 | 2.74416  | -0.00078 | H                                            | 13.07387     | 1.77393  | -0.33144 | H | -0.96994 | -3.49353 | 2.17251  |
| C | -8.13701 | 5.48608  | 0.33247  | C                                            | -13.85067    | 0.82173  | 0.60824  | C | 0.1847   | -2.21219 | 0.11096  |
| C | -8.24339 | 4.69632  | 1.4819   | H                                            | -13.07193    | -1.77539 | 0.34046  | C | -4.19664 | 1.20555  | 0.6236   |
| C | -8.42895 | 3.31261  | 1.40387  | C                                            | 13.8819      | -2.36566 | -0.70956 | C | -4.07099 | -1.20233 | 2.45835  |
| C | -8.50684 | 2.70105  | 0.1343   | H                                            | 14.91766     | -2.6949  | -0.84867 | H | -4.88817 | -0.51269 | 2.61445  |
| C | -8.40567 | 3.48255  | -1.03588 | H                                            | 13.49367     | -2.83585 | 0.20073  | C | 3.17828  | 1.51516  | -1.02866 |
| C | -8.22383 | 4.86414  | -0.91737 | H                                            | 13.295       | -2.71332 | -1.56699 | C | -0.12876 | -3.56244 | -0.11882 |
| H | -8.18058 | 5.16469  | 2.45917  | C                                            | 14.73272     | -0.40738 | 0.61036  | H | -1.14755 | -3.89768 | 0.01733  |
| C | 8.1278   | -5.48462 | -0.33908 | H                                            | 15.75496     | -0.77945 | 0.47256  | C | 0.65518  | 0.64137  | -0.07882 |
| C | 8.20605  | -4.8646  | 0.91094  | H                                            | 14.77292     | 0.68154  | 0.71443  | C | 0.86383  | 2.04371  | -0.20281 |
| C | 8.3923   | -3.48277 | 1.03259  | H                                            | 14.3266      | -0.82863 | 1.53634  | C | 2.49384  | -2.67868 | -0.58593 |
| C | 8.50623  | -2.70112 | -0.13502 | C                                            | 14.44744     | -0.23232 | -1.90597 | C | 2.19095  | 2.49375  | -0.66616 |
| C | 8.4368   | -3.31178 | -1.40684 | H                                            | 15.4676      | -0.60668 | -2.0534  | C | 6.13053  | -2.01576 | -0.65153 |
| C | 8.24695  | -4.69361 | -1.48783 | H                                            | 13.83703     | -0.52603 | -2.76673 | C | -4.08004 | 2.5798   | 0.33658  |
| H | 8.12503  | -5.46638 | 1.8107   | H                                            | 14.48341     | 0.86091  | -1.86488 | C | -2.79677 | 3.20444  | 0.23358  |
| H | 2.96776  | -4.4648  | 3.47924  | C                                            | -13.88052    | 2.36411  | 0.71797  | C | 3.83283  | -2.19058 | -0.70627 |
| H | -2.96837 | 4.46556  | -3.4801  | H                                            | -14.91616    | 2.69315  | 0.85844  | C | 4.28547  | 1.8856   | -1.83846 |
| C | 8.54703  | -2.47243 | -2.6683  | H                                            | -13.29247    | 2.7123   | 1.5744   | H | 4.90612  | 1.096    | -2.23536 |
| H | 8.51421  | -3.10952 | -3.55709 | H                                            | -13.49373    | 2.83404  | -0.19308 | C | -0.31497 | 2.93919  | -0.01229 |
| H | 7.72308  | -1.75193 | -2.72559 | C                                            | -14.44371    | 0.23111  | 1.91609  | C | 6.38689  | 0.3971   | -0.25278 |
| H | 9.48255  | -1.90257 | -2.6786  | H                                            | -15.46379    | 0.60517  | 2.06483  | H | 6.00509  | 1.40151  | -0.12487 |
| C | 7.89619  | -6.98124 | -0.45558 | H                                            | -14.47934    | -0.86215 | 1.87553  | C | -4.0095  | -2.37365 | 3.18625  |
| H | 8.11328  | -7.48608 | 0.49085  | H                                            | -13.83216    | 0.52542  | 2.77583  | H | -4.79744 | -2.61613 | 3.88951  |
| H | 6.85132  | -7.18925 | -0.71932 | C                                            | -14.73276    | 0.40507  | -0.59989 | C | -2.66943 | 4.6001   | 0.11812  |
| H | 8.53238  | -7.41747 | -1.23352 | H                                            | -15.75489    | 0.77695  | -0.46073 | H | -3.55542 | 5.21593  | 0.13302  |
| H | 8.18971  | -5.16071 | -2.46624 | H                                            | -14.32812    | 0.82606  | -1.52664 | C | 4.57194  | 3.19876  | -2.12533 |
| C | 8.47335  | -2.83753 | 2.40603  | H                                            | -14.77285    | -0.68389 | -0.70347 | H | 5.41393  | 3.46004  | -2.75451 |
| H | 9.35046  | -2.18617 | 2.48161  |                                              |              |          |          | C | -0.27722 | 4.34421  | -0.06808 |
| H | 7.58774  | -2.22019 | 2.59713  | TS- PH1-A                                    |              |          |          | H | 0.64172  | 4.87247  | -0.1677  |
| H | 8.53554  | -3.60283 | 3.18564  | Sum of electronic and thermal Free Energies= | -4166.025350 |          |          | C | -2.89296 | -3.22242 | 3.05811  |
| C | -8.49736 | 2.83442  | -2.40724 | a.u.                                         |              |          |          | C | 5.28433  | -4.40261 | -0.84344 |
| H | -8.5565  | 3.5981   | -3.18865 | C                                            | -3.04607     | -0.84889 | 1.54555  | C | -6.48618 | 6.7528   | 0.55817  |
| H | -7.61786 | 2.20905  | -2.60005 | C                                            | -1.76649     | 0.97386  | 0.49921  | H | -6.74681 | 7.43369  | 1.3623   |
| H | -9.38022 | 2.19013  | -2.47751 | C                                            | -3.03639     | 0.42911  | 0.86606  | C | -6.51278 | 7.20727  | -0.76325 |
| C | -8.52766 | 2.47512  | 2.66751  | C                                            | -1.91443     | -1.70315 | 1.41567  | C | -6.12888 | 5.43578  | 0.87212  |
| H | -9.4618  | 1.90314  | 2.68569  | C                                            | 4.09845      | -0.80815 | -0.66752 | C | 2.62033  | 3.84667  | -0.85784 |
| H | -7.7016  | 1.7567   | 2.72     | C                                            | 1.7301       | -0.31349 | -0.28678 | H | 2.08347  | 4.66357  | -0.42876 |
| H | -8.48986 | 3.11375  | 3.555    | C                                            | 1.4772       | -1.7286  | -0.23129 | C | -5.78345 | 4.55219  | -0.17014 |
| C | -7.9054  | 6.98346  | 0.43805  | C                                            | -0.62833     | 0.10605  | 0.36189  | C | -5.63205 | 0.85383  | 0.51839  |
| H | -8.31605 | 7.37906  | 1.37258  | C                                            | 3.02193      | 0.13456  | -0.65624 | C | -5.41693 | 3.14546  | 0.14112  |
| H | -6.83104 | 7.20831  | 0.41949  | C                                            | -1.62247     | 2.36548  | 0.21615  | C | 5.37008  | -5.18241 | 0.32783  |
| H | -8.37472 | 7.51314  | -0.39753 | C                                            | 5.57144      | -0.65705 | -0.56177 | C | 5.09496  | -2.93175 | -0.74958 |
| H | -8.15378 | 5.46549  | -1.81852 | C                                            | -0.79294     | -1.26799 | 0.60962  | C | 7.5397   | -2.24935 | -0.53441 |
| C | 13.8523  | -0.82331 | -0.59924 | C                                            | -1.86267     | -2.88522 | 2.2038   | H | 7.91744  | -3.26164 | -0.63017 |

|   |          |          |          |   |           |          |          |   |           |          |          |
|---|----------|----------|----------|---|-----------|----------|----------|---|-----------|----------|----------|
| C | -5.80222 | 4.99446  | -1.51133 | H | 6.06292   | -3.41376 | -3.40376 | H | -7.78266  | -7.60608 | -0.18071 |
| C | -1.41317 | 5.15181  | 0.00134  | C | -8.62025  | -1.37354 | 0.17383  | H | -6.40714  | -7.2038  | 0.86275  |
| H | -1.29354 | 6.22774  | -0.05305 | C | -7.71811  | -0.32006 | 0.24724  | H | -8.00532  | -7.48423 | 1.57716  |
| C | -6.33951 | 2.11282  | 0.24209  | C | -8.43017  | 0.94997  | 0.03851  | H | -8.05101  | -5.24624 | 2.6845   |
| C | -6.16702 | 6.3149   | -1.78594 | C | 8.81841   | 1.05539  | 0.17365  | C | -8.0879   | -2.95987 | -2.21231 |
| H | -6.17933 | 6.65404  | -2.81735 | C | 7.79344   | 0.16326  | -0.1122  | H | -9.03748  | -2.44563 | -2.39708 |
| C | 0.84669  | -4.46032 | -0.55244 | C | 8.35254   | -1.18696 | -0.27797 | H | -7.28897  | -2.21455 | -2.29773 |
| H | 0.58118  | -5.49504 | -0.73455 | C | 9.80401   | -1.06431 | -0.07844 | H | -7.94166  | -3.71688 | -2.98851 |
| C | 3.76267  | 4.19111  | -1.54926 | C | 10.08158  | 0.30716  | 0.1966   | C | 8.55844   | 2.02445  | 2.90997  |
| C | 5.65953  | -7.18747 | -1.03501 | C | 11.38502  | 0.74615  | 0.43035  | H | 8.52933   | 2.56701  | 3.85946  |
| C | 2.1545   | -4.03874 | -0.73982 | C | 12.44641  | -0.17423 | 0.39986  | H | 7.67655   | 1.37633  | 2.85208  |
| H | 2.92554  | -4.74018 | -1.02157 | C | 12.15318  | -1.52588 | 0.12823  | H | 9.44259   | 1.37749  | 2.90172  |
| C | 5.55683  | -6.5649  | 0.21254  | C | 10.84924  | -1.97801 | -0.11149 | C | 8.8459    | 2.90287  | -2.08982 |
| H | 5.61767  | -7.16492 | 1.11504  | H | 11.56024  | 1.79463  | 0.63124  | H | 9.68933   | 2.21093  | -2.18719 |
| C | -6.30384 | -0.33661 | 0.47571  | H | 10.66883  | -3.02713 | -0.31838 | H | 7.94022   | 2.35982  | -2.38481 |
| H | -5.80265 | -1.28621 | 0.61341  | C | -9.84443  | 0.60518  | -0.16281 | H | 8.99301   | 3.73524  | -2.78476 |
| C | 5.38503  | -5.01403 | -2.11201 | C | -9.95342  | -0.81465 | -0.07864 | C | 8.4089    | 6.77418  | 1.15762  |
| C | 5.56835  | -6.39771 | -2.18758 | C | -11.18534 | -1.45277 | -0.22838 | H | 9.22063   | 7.11261  | 1.81261  |
| H | 5.64109  | -6.86721 | -3.16385 | C | -12.34085 | -0.69104 | -0.46967 | H | 8.46418   | 7.34153  | 0.22361  |
| C | -7.75508 | 2.1341   | 0.0264   | C | -12.21409 | 0.71085  | -0.55054 | H | 7.45831   | 7.01519  | 1.64862  |
| H | -8.24803 | 3.08236  | -0.15878 | C | -10.98419 | 1.36322  | -0.39925 | H | 8.40658   | 4.74141  | 2.97409  |
| C | -6.08986 | 4.97079  | 2.31793  | H | -11.2319  | -2.53118 | -0.15584 | C | -13.72993 | -1.33522 | -0.65089 |
| H | -5.08342 | 4.62932  | 2.58754  | H | -10.93258 | 2.44431  | -0.46773 | H | -13.0966  | 1.31168  | -0.73624 |
| H | -6.77444 | 4.1306   | 2.47651  | C | 8.51417   | 5.28205  | 0.89285  | C | 13.90889  | 0.24379  | 0.65342  |
| H | -6.37266 | 5.78554  | 2.9911   | C | 8.63122   | 4.78722  | -0.40845 | H | 12.96191  | -2.24671 | 0.10283  |
| C | -6.91083 | 8.6356   | -1.09319 | C | 8.7244    | 3.41395  | -0.66393 | C | -13.68053 | -2.87627 | -0.52592 |
| H | -7.08225 | 9.21441  | -0.18054 | C | 8.69984   | 2.51286  | 0.41891  | H | -14.69001 | -3.27908 | -0.66481 |
| H | -7.83275 | 8.65433  | -1.68733 | C | 8.58856   | 2.99491  | 1.74171  | H | -13.02998 | -3.31533 | -1.29044 |
| H | -6.12686 | 9.13516  | -1.67454 | C | 8.49535   | 4.37199  | 1.95697  | H | -13.32294 | -3.18321 | 0.4632   |
| C | 5.2347   | -4.53178 | 1.69314  | H | 8.65373   | 5.48095  | -1.24304 | C | -14.27916 | -0.98168 | -2.05957 |
| H | 6.00101  | -3.76266 | 1.83725  | C | -7.79994  | -5.57404 | 0.57304  | H | -15.27047 | -1.43031 | -2.19715 |
| H | 5.33347  | -5.27865 | 2.48646  | C | -7.81941  | -4.96604 | -0.68642 | H | -14.36999 | 0.10159  | -2.18778 |
| H | 4.25666  | -4.04629 | 1.79064  | C | -8.07887  | -3.59983 | -0.83463 | H | -13.60781 | -1.36654 | -2.83475 |
| C | -5.41048 | 4.0492   | -2.63284 | C | -8.32397  | -2.81946 | 0.31479  | C | -14.69597 | -0.79175 | 0.43658  |
| H | -4.37309 | 3.71717  | -2.50936 | C | -8.31457  | -3.417   | 1.59255  | H | -15.68775 | -1.24288 | 0.31265  |
| H | -5.50397 | 4.5447   | -3.60374 | C | -8.053    | -4.78645 | 1.70102  | H | -14.31926 | -1.03796 | 1.43515  |
| H | -6.04533 | 3.15666  | -2.63059 | H | -7.63037  | -5.56524 | -1.57167 | H | -14.80065 | 0.29552  | 0.36492  |
| C | 5.8867   | -8.68547 | -1.14382 | H | -2.81955  | -4.11628 | 3.66644  | C | 14.04459  | 1.75928  | 0.93089  |
| H | 6.93862  | -8.90026 | -1.37201 | H | 4.01923   | 5.2385   | -1.65814 | H | 15.09974  | 1.99794  | 1.10495  |
| H | 5.27482  | -9.11811 | -1.94294 | C | -8.58857  | -2.58384 | 2.83335  | H | 13.69676  | 2.35206  | 0.07756  |
| H | 5.6347   | -9.18894 | -0.20536 | H | -8.65488  | -3.22402 | 3.71829  | H | 13.47753  | 2.05231  | 1.82145  |
| C | 5.27848  | -4.17793 | -3.37577 | H | -7.78959  | -1.85066 | 2.99343  | C | 14.76497  | -0.09843 | -0.5962  |
| H | 4.31367  | -3.659   | -3.41829 | H | -9.52691  | -2.02799 | 2.73043  | H | 15.80879  | 0.18947  | -0.42293 |
| H | 5.37289  | -4.80997 | -4.2638  | C | -7.48456  | -7.05305 | 0.71585  | H | 14.73489  | -1.17069 | -0.81451 |

|                                              |              |          |          |   |          |          |          |   |           |          |          |
|----------------------------------------------|--------------|----------|----------|---|----------|----------|----------|---|-----------|----------|----------|
| H                                            | 14.39073     | 0.44365  | -1.47132 | H | -4.53594 | -2.65234 | 3.64656  | H | -4.46208  | 4.81532  | 1.85786  |
| C                                            | 14.4555      | -0.52532 | 1.8865   | C | -2.75759 | 4.39653  | -1.05768 | H | -6.12744  | 4.34009  | 2.20896  |
| H                                            | 15.49703     | -0.2374  | 2.07342  | H | -3.64639 | 5.00573  | -1.1175  | H | -5.62251  | 6.03138  | 2.43747  |
| H                                            | 13.85982     | -0.28868 | 2.77466  | C | 4.64014  | 3.64792  | -1.47217 | C | -7.07409  | 8.47043  | -1.68051 |
| H                                            | 14.42024     | -1.60731 | 1.72458  | H | 5.57522  | 4.07455  | -1.81513 | H | -7.95136  | 8.77782  | -1.09866 |
|                                              |              |          |          | C | -0.40229 | 4.06093  | -1.49218 | H | -7.32828  | 8.53678  | -2.74265 |
| (M, P, P, P)-1                               |              |          |          | H | 0.50466  | 4.40957  | -1.96175 | H | -6.26821  | 9.18567  | -1.47605 |
| Sum of electronic and thermal Free Energies= | -4166.037685 |          |          | C | -2.74214 | -3.29977 | 2.62344  | C | 5.34775   | -4.59518 | 1.13024  |
| a.u                                          |              |          |          | C | 5.42819  | -4.23119 | -1.38331 | H | 6.10506   | -3.83853 | 1.36168  |
| C                                            | -2.95599     | -0.88205 | 1.18451  | C | -6.2921  | 6.74912  | 0.00632  | H | 5.43747   | -5.41315 | 1.85127  |
| C                                            | -1.76739     | 0.93051  | 0.03041  | H | -6.32246 | 7.52565  | 0.76465  | H | 4.36424   | -4.12712 | 1.25352  |
| C                                            | -3.00377     | 0.39955  | 0.50182  | C | -6.64969 | 7.05907  | -1.31189 | C | -6.14807  | 3.6651   | -3.01514 |
| C                                            | -1.85214     | -1.75901 | 0.9488   | C | -5.89693 | 5.45972  | 0.37114  | H | -5.12845  | 3.27162  | -3.102   |
| C                                            | 4.18657      | -0.67871 | -0.90155 | C | 2.39643  | 3.94271  | -0.64227 | H | -6.44812  | 4.07077  | -3.98593 |
| C                                            | 1.79016      | -0.27026 | -0.66165 | H | 1.61809  | 4.57798  | -0.24471 | H | -6.80549  | 2.82483  | -2.76768 |
| C                                            | 1.55997      | -1.68725 | -0.68449 | C | -5.85624 | 4.44802  | -0.61356 | C | 6.10762   | -8.4576  | -2.06941 |
| C                                            | -0.63073     | 0.05963  | -0.141   | C | -5.62588 | 0.82458  | 0.38156  | H | 7.12315   | -8.62356 | -2.45033 |
| C                                            | 3.09698      | 0.25466  | -0.88701 | C | -5.45529 | 3.06735  | -0.23485 | H | 5.40282   | -8.85435 | -2.80915 |
| C                                            | -1.67506     | 2.28303  | -0.42434 | C | 5.51449  | -5.11343 | -0.28752 | H | 5.99421   | -9.03114 | -1.14446 |
| C                                            | 5.64991      | -0.53993 | -0.67575 | C | 5.21263  | -2.77865 | -1.15362 | C | 5.45562   | -3.77191 | -3.88267 |
| C                                            | -0.76014     | -1.31185 | 0.10842  | C | 7.63058  | -2.12088 | -0.71793 | H | 4.48447   | -3.26347 | -3.88785 |
| C                                            | -1.77665     | -2.96653 | 1.69463  | H | 8.02357  | -3.10981 | -0.9284  | H | 5.56842   | -4.3167  | -4.82471 |
| H                                            | -0.90874     | -3.5988  | 1.57357  | C | -6.21445 | 4.74107  | -1.9451  | H | 6.23017   | -2.99888 | -3.82921 |
| C                                            | 0.26199      | -2.21278 | -0.40219 | C | -1.55723 | 4.84348  | -1.57969 | C | -8.64303  | -1.38914 | 0.53079  |
| C                                            | -4.18307     | 1.17224  | 0.31554  | H | -1.51093 | 5.8057   | -2.07643 | C | -7.73568  | -0.34393 | 0.41654  |
| C                                            | -3.89718     | -1.22665 | 2.18447  | C | -6.35899 | 2.06127  | 0.07104  | C | -8.46387  | 0.91341  | 0.19075  |
| H                                            | -4.67169     | -0.51529 | 2.43309  | C | -6.60518 | 6.04539  | -2.27274 | C | 8.81044   | 1.04566  | 0.55861  |
| C                                            | 3.24189      | 1.68657  | -1.04911 | H | -6.87641 | 6.27122  | -3.29917 | C | 7.82264   | 0.20028  | 0.0716   |
| C                                            | -0.00397     | -3.56047 | -0.687   | C | 1.0076   | -4.40959 | -1.14222 | C | 8.41215   | -1.1063  | -0.25371 |
| H                                            | -1.01394     | -3.93308 | -0.58207 | H | 0.77544  | -5.44278 | -1.37275 | C | 9.84381   | -1.00789 | 0.06487  |
| C                                            | 0.65234      | 0.60932  | -0.54123 | C | 3.62794  | 4.47944  | -0.94857 | C | 10.07997  | 0.30911  | 0.55979  |
| C                                            | 0.79649      | 1.99593  | -0.70068 | C | 5.86145  | -6.97874 | -1.82418 | C | 11.35576  | 0.71324  | 0.95423  |
| C                                            | 2.61002      | -2.5879  | -1.05737 | C | 2.30628  | -3.9467  | -1.28947 | C | 12.4309   | -0.18643 | 0.86368  |
| C                                            | 2.12712      | 2.55133  | -0.80439 | H | 3.09807  | -4.61547 | -1.59126 | C | 12.17956  | -1.48375 | 0.37201  |
| C                                            | 6.23068      | -1.87451 | -0.8997  | C | 5.72943  | -6.47598 | -0.5268  | C | 10.90336  | -1.90141 | -0.02611 |
| C                                            | -4.10404     | 2.51328  | -0.13008 | H | 5.79008  | -7.15538 | 0.31749  | H | 11.49773  | 1.71865  | 1.32754  |
| C                                            | -2.85293     | 3.10047  | -0.5041  | C | -6.30495 | -0.35797 | 0.49599  | H | 10.75465  | -2.90895 | -0.39854 |
| C                                            | 3.94004      | -2.0571  | -1.09586 | H | -5.79872 | -1.30175 | 0.64977  | C | -9.89283  | 0.57111  | 0.17885  |
| C                                            | 4.44902      | 2.28319  | -1.50458 | C | 5.55931  | -4.72082 | -2.70128 | C | -9.99547  | -0.83585 | 0.38849  |
| H                                            | 5.22814      | 1.64107  | -1.88559 | C | 5.77236  | -6.0875  | -2.9009  | C | -11.23857 | -1.4678  | 0.43676  |
| C                                            | -0.41212     | 2.81413  | -0.84853 | H | 5.86945  | -6.46356 | -3.91486 | C | -12.41183 | -0.71268 | 0.27148  |
| C                                            | 6.42773      | 0.45019  | -0.13816 | C | -7.7901  | 2.0844   | 0.01524  | C | -12.29073 | 0.67599  | 0.06028  |
| H                                            | 6.02637      | 1.41809  | 0.13106  | H | -8.29607 | 3.0227   | -0.18495 | C | -11.04939 | 1.3225   | 0.01449  |
| C                                            | -3.8086      | -2.4178  | 2.87844  | C | -5.50577 | 5.14649  | 1.8048   | H | -11.28026 | -2.53589 | 0.60374  |

|   |           |          |          |                                              |              |          |          |   |          |          |          |
|---|-----------|----------|----------|----------------------------------------------|--------------|----------|----------|---|----------|----------|----------|
| H | -11.00216 | 2.39391  | -0.14656 | H                                            | -13.18695    | 1.2709   | -0.07013 | H | 1.22608  | -3.27023 | 3.02808  |
| C | 8.37119   | 5.12389  | 1.84261  | C                                            | 13.86483     | 0.1978   | 1.28131  | C | -0.17515 | -2.11711 | 0.99621  |
| C | 8.72373   | 4.82508  | 0.52377  | H                                            | 12.99969     | -2.18842 | 0.29717  | C | 4.35776  | 1.20676  | 0.7212   |
| C | 8.86743   | 3.50292  | 0.08685  | C                                            | -13.75885    | -2.87323 | 0.57433  | C | 4.42169  | -1.13149 | 2.64879  |
| C | 8.64836   | 2.45185  | 1.00008  | H                                            | -14.77966    | -3.2708  | 0.59711  | H | 5.27928  | -0.47506 | 2.62619  |
| C | 8.29865   | 2.73486  | 2.3382   | H                                            | -13.20804    | -3.3929  | -0.21747 | C | -3.13298 | 1.7768   | 0.17375  |
| C | 8.16499   | 4.06717  | 2.73757  | H                                            | -13.28589    | -3.09206 | 1.53818  | C | 0.05745  | -3.49472 | 0.87618  |
| H | 8.89382   | 5.63429  | -0.17954 | C                                            | -14.52234    | -1.11788 | -1.05087 | H | 1.06659  | -3.86903 | 0.9716   |
| C | -7.80566  | -5.5553  | 1.17824  | H                                            | -15.52552    | -1.56035 | -1.03088 | C | -0.54602 | 0.67854  | 0.58035  |
| C | -8.00334  | -5.05748 | -0.11539 | H                                            | -14.6202     | -0.04936 | -1.2675  | C | -0.66619 | 2.03079  | 0.23348  |
| C | -8.2709   | -3.70558 | -0.34428 | H                                            | -13.94808    | -1.5836  | -1.85901 | C | -2.54373 | -2.51929 | 0.46153  |
| C | -8.3393   | -2.82275 | 0.75598  | C                                            | -14.64662    | -0.69493 | 1.44858  | C | -1.95955 | 2.51803  | -0.17495 |
| C | -8.14671  | -3.307   | 2.06534  | H                                            | -15.64939    | -1.13782 | 1.47898  | C | -6.0954  | -1.87396 | -0.2282  |
| C | -7.88283  | -4.66857 | 2.25527  | H                                            | -14.15998    | -0.85872 | 2.41607  | C | 4.22753  | 2.58549  | 0.4432   |
| H | -7.94793  | -5.73434 | -0.96253 | H                                            | -14.75083    | 0.38338  | 1.292    | C | 2.94388  | 3.21906  | 0.45084  |
| H | -2.64896  | -4.21658 | 3.19373  | C                                            | 13.95456     | 1.65546  | 1.79004  | C | -3.85092 | -1.98877 | 0.24695  |
| H | 3.81258   | 5.53703  | -0.80169 | H                                            | 14.99094     | 1.87305  | 2.07137  | C | -4.34041 | 2.51321  | 0.18127  |
| C | -8.22732  | -2.36557 | 3.2555   | H                                            | 13.65532     | 2.36671  | 1.01215  | H | -5.16728 | 2.10128  | 0.71114  |
| H | -8.16977  | -2.92671 | 4.19317  | H                                            | 13.32222     | 1.80706  | 2.67178  | C | 0.48474  | 2.92713  | 0.36267  |
| H | -7.40633  | -1.6396  | 3.23333  | C                                            | 14.81248     | 0.05224  | 0.05997  | C | -6.65471 | 0.42057  | 0.28671  |
| H | -9.16478  | -1.79899 | 3.24244  | H                                            | 15.83594     | 0.31943  | 0.34934  | H | -6.52254 | 1.41491  | 0.66767  |
| C | -7.50471  | -7.02831 | 1.39634  | H                                            | 14.8174      | -0.9755  | -0.31638 | C | 4.425    | -2.23506 | 3.47796  |
| H | -8.25544  | -7.65813 | 0.90501  | H                                            | 14.49087     | 0.71575  | -0.74999 | H | 5.30035  | -2.45915 | 4.07624  |
| H | -6.52338  | -7.28827 | 0.98043  | C                                            | 14.33689     | -0.74344 | 2.42261  | C | 2.76661  | 4.61668  | 0.39761  |
| H | -7.49766  | -7.27211 | 2.46306  | H                                            | 15.35904     | -0.48234 | 2.72207  | H | 3.63559  | 5.25666  | 0.35546  |
| H | -7.73891  | -5.04175 | 3.26439  | H                                            | 13.67894     | -0.64372 | 3.2926   | C | -4.46496 | 3.76379  | -0.38734 |
| C | -8.47142  | -3.18526 | -1.75739 | H                                            | 14.32823     | -1.78951 | 2.1005   | H | -5.41593 | 4.28221  | -0.34508 |
| H | -9.43728  | -2.67701 | -1.85227 |                                              |              |          |          | C | 0.36421  | 4.32572  | 0.4402   |
| H | -7.69177  | -2.45982 | -2.0164  | TS- PH1-B                                    |              |          |          | H | -0.61587 | 4.77011  | 0.52021  |
| H | -8.43487  | -4.00741 | -2.47824 | Sum of electronic and thermal Free Energies= | -4166.016919 |          |          | C | 3.26904  | -3.03015 | 3.59356  |
| C | 8.07302   | 1.60472  | 3.32821  | a.u.                                         |              |          |          | C | -5.17871 | -4.20472 | -0.4039  |
| H | 7.90216   | 2.00321  | 4.33262  | C                                            | 3.2878       | -0.7975  | 1.8654   | C | 6.0474   | 6.30259  | -1.88669 |
| H | 7.20332   | 1.00313  | 3.04088  | C                                            | 1.93327      | 0.98144  | 0.84019  | H | 5.94918  | 6.63288  | -2.9163  |
| H | 8.94001   | 0.93554  | 3.35823  | C                                            | 3.22457      | 0.43644  | 1.10559  | C | 6.46939  | 7.21184  | -0.90906 |
| C | 9.24656   | 3.20255  | -1.35353 | C                                            | 2.11698      | -1.60793 | 1.97461  | C | 5.74281  | 4.97643  | -1.56818 |
| H | 10.13135  | 2.55812  | -1.39734 | C                                            | -4.15234     | -0.59853 | 0.34732  | C | -2.12331 | 3.73118  | -0.90418 |
| H | 8.43369   | 2.67651  | -1.8678  | C                                            | -1.71116     | -0.18968 | 0.59017  | H | -1.25175 | 4.17224  | -1.36683 |
| H | 9.46019   | 4.12834  | -1.89625 | C                                            | -1.48063     | -1.59933 | 0.70824  | C | 5.86608  | 4.54632  | -0.22889 |
| C | 8.20604   | 6.56219  | 2.30283  | C                                            | 0.76069      | 0.14648  | 0.93261  | C | 5.77388  | 0.84809  | 0.48181  |
| H | 8.51339   | 7.26141  | 1.51925  | C                                            | -3.04434     | 0.34282  | 0.43939  | C | 5.5432   | 3.14024  | 0.12612  |
| H | 7.15863   | 6.77006  | 2.55433  | C                                            | 1.79112      | 2.36478  | 0.50979  | C | -4.93071 | -4.69912 | -1.70032 |
| H | 8.81107   | 6.75907  | 3.1955   | C                                            | -5.65437     | -0.50682 | 0.12446  | C | -5.03568 | -2.74828 | -0.12972 |
| H | 7.89659   | 4.28417  | 3.76698  | C                                            | 0.90349      | -1.19621 | 1.29888  | C | -7.45335 | -2.21107 | -0.54008 |
| C | -13.81558 | -1.34999 | 0.31217  | C                                            | 2.13792      | -2.71205 | 2.86957  | H | -7.67947 | -3.23327 | -0.82244 |

|   |          |          |          |   |           |          |          |   |           |          |          |
|---|----------|----------|----------|---|-----------|----------|----------|---|-----------|----------|----------|
| C | 6.29284  | 5.4465   | 0.7682   | H | -6.63694  | -3.79149 | 2.01797  | H | 7.76078   | -7.43315 | 1.4347   |
| C | 1.4901   | 5.15288  | 0.45517  | C | 8.69226   | -1.40903 | -0.15082 | H | 6.51232   | -7.29202 | 0.18253  |
| H | 1.35874  | 6.22732  | 0.50953  | C | 7.81203   | -0.34662 | 0.01177  | H | 8.18126   | -7.67952 | -0.27244 |
| C | 6.46418  | 2.10162  | 0.14105  | C | 8.51431   | 0.91722  | -0.25849 | H | 7.63643   | -5.59516 | -1.86547 |
| C | 6.58495  | 6.76872  | 0.41158  | C | -9.12914  | 0.92292  | 0.00743  | C | 8.72041   | -2.62127 | 2.5164   |
| H | 6.90661  | 7.46336  | 1.18112  | C | -8.01361  | 0.0971   | -0.02599 | H | 9.63364   | -2.03296 | 2.37699  |
| C | -0.98483 | -4.37808 | 0.59642  | C | -8.40259  | -1.24177 | -0.45931 | H | 7.90541   | -1.91822 | 2.7243   |
| H | -0.78247 | -5.43924 | 0.51058  | C | -9.85156  | -1.20184 | -0.69693 | H | 8.84929   | -3.26908 | 3.38881  |
| C | -3.35579 | 4.33397  | -1.04053 | C | -10.28945 | 0.1276   | -0.41491 | C | -8.22337  | 2.93371  | -1.92668 |
| C | -5.5091  | -6.94832 | -0.94679 | C | -11.6273  | 0.49201  | -0.57275 | H | -8.17279  | 3.81009  | -2.58012 |
| C | -2.27303 | -3.90663 | 0.42449  | C | -12.56446 | -0.46238 | -1.00164 | H | -7.22287  | 2.48772  | -1.87396 |
| H | -3.08154 | -4.59186 | 0.23332  | C | -12.11547 | -1.77291 | -1.26549 | H | -8.89147  | 2.19445  | -2.3794  |
| C | -5.09901 | -6.06595 | -1.95048 | C | -10.77472 | -2.14911 | -1.12124 | C | -10.06761 | 1.7011   | 2.65853  |
| H | -4.90345 | -6.44639 | -2.94806 | H | -11.92453 | 1.51177  | -0.36678 | H | -10.87603 | 1.08745  | 2.24687  |
| C | 6.42495  | -0.34959 | 0.36947  | H | -10.46997 | -3.16594 | -1.34289 | H | -9.24124  | 1.02685  | 2.91179  |
| H | 5.92635  | -1.29456 | 0.54594  | C | 9.90025   | 0.5593   | -0.59157 | H | -10.42181 | 2.17806  | 3.57715  |
| C | -5.59755 | -5.07965 | 0.62212  | C | 10.00221  | -0.86167 | -0.5235  | C | -9.20228  | 6.55043  | 1.48768  |
| C | -5.7527  | -6.43894 | 0.3347   | C | 11.20927  | -1.51093 | -0.78561 | H | -10.1849  | 6.84167  | 1.87628  |
| H | -6.06721 | -7.11239 | 1.12621  | C | 12.34521  | -0.75932 | -1.12922 | H | -8.45952  | 6.74646  | 2.27104  |
| C | 7.85315  | 2.10832  | -0.2071  | C | 12.22541  | 0.64413  | -1.19362 | H | -8.96912  | 7.18931  | 0.63045  |
| H | 8.33673  | 3.05138  | -0.43823 | C | 11.02124  | 1.30759  | -0.92769 | H | -8.41849  | 5.43276  | -0.88489 |
| C | 5.26962  | 4.01195  | -2.64119 | H | 11.25201  | -2.58982 | -0.71794 | C | 13.70667  | -1.41581 | -1.43597 |
| H | 4.25784  | 3.65422  | -2.41813 | H | 10.97459  | 2.38948  | -0.98592 | H | 13.09339  | 1.23734  | -1.45648 |
| H | 5.92515  | 3.13599  | -2.69376 | C | -9.18943  | 5.08413  | 1.09129  | C | -14.05617 | -0.12371 | -1.1975  |
| H | 5.25795  | 4.50123  | -3.61968 | C | -9.62361  | 4.10338  | 1.99147  | H | -12.82801 | -2.51941 | -1.5967  |
| C | 6.80685  | 8.64415  | -1.28635 | C | -9.61418  | 2.74766  | 1.65483  | C | 13.65208  | -2.95693 | -1.3182  |
| H | 7.7449   | 8.68386  | -1.85445 | C | -9.15149  | 2.35763  | 0.3775   | H | 14.64075  | -3.36834 | -1.55047 |
| H | 6.92449  | 9.26687  | -0.39417 | C | -8.71329  | 3.33221  | -0.54367 | H | 13.38223  | -3.26829 | -0.30301 |
| H | 6.01841  | 9.08099  | -1.90968 | C | -8.74095  | 4.68219  | -0.16979 | H | 12.93061  | -3.38316 | -2.0241  |
| C | -4.46304 | -3.76356 | -2.80082 | H | -9.97481  | 4.39955  | 2.97521  | C | 14.76836  | -0.89051 | -0.43202 |
| H | -5.18275 | -2.95248 | -2.95508 | C | 7.86674   | -5.60615 | 0.2752   | H | 15.74247  | -1.34594 | -0.64721 |
| H | -4.33947 | -4.30773 | -3.74183 | C | 8.15004   | -4.81974 | 1.39463  | H | 14.87332  | 0.19693  | -0.50044 |
| H | -3.50304 | -3.30639 | -2.53409 | C | 8.41408   | -3.4497  | 1.27978  | H | 14.47872  | -1.1463  | 0.59286  |
| C | 6.41142  | 4.99281  | 2.21338  | C | 8.39499   | -2.85306 | 0.00317  | C | 14.13534  | -1.05629 | -2.88432 |
| H | 5.4511   | 4.61299  | 2.58133  | C | 8.11647   | -3.6341  | -1.14075 | H | 15.10774  | -1.5112  | -3.10818 |
| H | 6.72518  | 5.82391  | 2.85195  | C | 7.85492   | -4.99743 | -0.98576 | H | 13.39753  | -1.43125 | -3.60182 |
| H | 7.14215  | 4.18229  | 2.30928  | H | 8.16999   | -5.27907 | 2.37783  | H | 14.22309  | 0.02714  | -3.01303 |
| C | -5.70385 | -8.42676 | -1.23669 | H | 3.25056   | -3.86295 | 4.28677  | C | -14.3688  | 1.35527  | -0.87096 |
| H | -6.77159 | -8.67921 | -1.25965 | H | -3.45915  | 5.24895  | -1.61148 | H | -15.43768 | 1.53782  | -1.02822 |
| H | -5.22995 | -9.04319 | -0.46447 | C | 8.08229   | -2.99241 | -2.51728 | H | -14.13244 | 1.58958  | 0.17293  |
| H | -5.27105 | -8.69552 | -2.20511 | H | 7.90049   | -3.74703 | -3.28827 | H | -13.80701 | 2.03303  | -1.52328 |
| C | -5.8474  | -4.55065 | 2.02355  | H | 7.28761   | -2.23959 | -2.57229 | C | -14.91329 | -1.01875 | -0.26201 |
| H | -4.94223 | -4.08082 | 2.42617  | H | 9.02894   | -2.4867  | -2.73653 | H | -15.97744 | -0.79663 | -0.40647 |
| H | -6.14578 | -5.36263 | 2.69324  | C | 7.56509   | -7.08835 | 0.41477  | H | -14.75033 | -2.08026 | -0.47345 |

|                                                            |           |          |          |   |           |          |          |   |           |          |          |
|------------------------------------------------------------|-----------|----------|----------|---|-----------|----------|----------|---|-----------|----------|----------|
| H                                                          | -14.65325 | -0.83086 | 0.78531  | H | -15.51376 | -0.15698 | -2.82365 | H | -14.28369 | -1.43319 | -2.94951 |
| C                                                          | -14.45172 | -0.3868  | -2.67586 | H | -13.85795 | 0.24538  | -3.34479 |   |           |          |          |
| <i>(P, M, P, P)</i> -1                                     |           |          |          |   |           |          |          |   |           |          |          |
| Sum of electronic and thermal Free Energies = -4166.032248 |           |          |          | H | 5.68577   | 3.801    | -2.12265 | H | -5.12077  | 3.63694  | 2.00272  |
| a.u.                                                       |           |          |          | C | -0.30435  | 3.94438  | -2.27604 | H | -4.3437   | 5.17083  | 2.46222  |
| C                                                          | -3.34674  | -1.25101 | -2.03218 | H | 0.63207   | 4.32465  | -2.65354 | C | -6.40143  | 8.70916  | -0.41145 |
| C                                                          | -1.86083  | 0.65299  | -1.58673 | C | -3.59077  | -3.70283 | -3.4096  | H | -7.02871  | 8.935    | 0.45919  |
| C                                                          | -3.17113  | 0.09584  | -1.5223  | C | 5.48616   | -4.41625 | -0.71778 | H | -6.91774  | 9.06804  | -1.30693 |
| C                                                          | -2.19795  | -2.07909 | -2.22521 | C | -5.49202  | 6.54856  | 0.54923  | H | -5.46632  | 9.27265  | -0.3068  |
| C                                                          | 4.16381   | -0.87853 | -1.13409 | H | -5.20289  | 7.10289  | 1.43697  | C | 4.99804   | -4.34761 | 1.77687  |
| C                                                          | 1.76436   | -0.52632 | -1.52834 | C | -6.12485  | 7.21834  | -0.50539 | H | 5.69613   | -3.53313 | 1.99746  |
| C                                                          | 1.55044   | -1.94439 | -1.46802 | C | -5.22016  | 5.17946  | 0.48685  | H | 4.97194   | -5.02843 | 2.63295  |
| C                                                          | -0.71093  | -0.20974 | -1.69294 | C | 2.40603   | 3.68296  | -1.26431 | H | 4.00288   | -3.90449 | 1.65326  |
| C                                                          | 3.08849   | 0.00826  | -1.46152 | H | 1.60699   | 4.31807  | -0.91268 | C | -6.63034  | 4.34376  | -2.98643 |
| C                                                          | -1.68169  | 2.07128  | -1.5947  | C | -5.59579  | 4.45661  | -0.66674 | H | -5.75194  | 3.87466  | -3.44503 |
| C                                                          | 5.54973   | -0.65431 | -0.62677 | C | -5.57967  | 0.69019  | -0.56925 | H | -7.09073  | 5.01246  | -3.71983 |
| C                                                          | -0.89284  | -1.59486 | -1.81131 | C | -5.31828  | 2.99966  | -0.7503  | H | -7.34026  | 3.54475  | -2.74671 |
| C                                                          | -2.35514  | -3.2894  | -2.95386 | C | 5.40987   | -5.09109 | 0.51792  | C | 6.35323   | -8.66001 | -0.5231  |
| H                                                          | -1.47467  | -3.86067 | -3.21017 | C | 5.21327   | -2.95608 | -0.78747 | H | 7.42759   | -8.83442 | -0.66264 |
| C                                                          | 0.22735   | -2.48726 | -1.55997 | C | 7.4896    | -2.16183 | 0.00826  | H | 5.81966   | -9.20822 | -1.30784 |
| C                                                          | -4.23043  | 0.9553   | -1.11556 | H | 7.90917   | -3.16114 | 0.05205  | H | 6.06478   | -9.07868 | 0.44589  |
| C                                                          | -4.5972   | -1.69281 | -2.53482 | C | -6.23782  | 5.11284  | -1.73632 | C | 5.91423   | -4.39618 | -3.22275 |
| H                                                          | -5.45101  | -1.03692 | -2.45016 | C | -1.43149  | 4.77096  | -2.30007 | H | 4.94471   | -3.95258 | -3.47702 |
| C                                                          | 3.25768   | 1.435    | -1.64046 | H | -1.3341   | 5.79016  | -2.65571 | H | 6.20033   | -5.08806 | -4.02052 |
| C                                                          | 0.03892   | -3.8561  | -1.30651 | C | -6.21375  | 2.00444  | -0.38178 | H | 6.64774   | -3.58327 | -3.18324 |
| H                                                          | -0.96519  | -4.24462 | -1.22267 | C | -6.49014  | 6.48699  | -1.63895 | C | -8.33611  | -1.3165  | 0.97503  |
| C                                                          | 0.62403   | 0.36004  | -1.61277 | H | -6.98017  | 6.99256  | -2.46506 | C | -7.49979  | -0.33103 | 0.46566  |
| C                                                          | 0.79411   | 1.75849  | -1.62021 | C | 1.12335   | -4.71469 | -1.12903 | C | -8.15327  | 0.9805   | 0.59499  |
| C                                                          | 2.65727   | -2.8419  | -1.29616 | H | 0.9485    | -5.76888 | -0.94836 | C | 8.41461   | 1.20968  | 0.90741  |
| C                                                          | 2.13086   | 2.304    | -1.51052 | C | 3.66988   | 4.20729  | -1.43071 | C | 7.53572   | 0.26259  | 0.40014  |
| C                                                          | 6.15709   | -1.98843 | -0.49067 | C | 6.03881   | -7.17521 | -0.58814 | C | 8.16843   | -1.06273 | 0.43815  |
| C                                                          | -4.07153  | 2.35804  | -1.16429 | C | 2.41804   | -4.22747 | -1.1668  | C | 9.50808   | -0.86945 | 1.01091  |
| C                                                          | -2.82097  | 2.94324  | -1.54361 | H | 3.25849   | -4.89154 | -1.04071 | C | 9.6524    | 0.52108  | 1.29493  |
| C                                                          | 3.96172   | -2.27781 | -1.13297 | C | 5.68603   | -6.46297 | 0.56157  | C | 10.82886  | 1.02438  | 1.85101  |
| C                                                          | 4.5125    | 2.01661  | -1.96182 | H | 5.61943   | -6.98316 | 1.5119   | C | 11.89246  | 0.15257  | 2.13892  |
| H                                                          | 5.31803   | 1.36368  | -2.26533 | C | -6.19589  | -0.4442  | -0.11675 | C | 11.73258  | -1.21798 | 1.85047  |
| C                                                          | -0.37793  | 2.61897  | -1.81297 | H | -5.73242  | -1.42052 | -0.18986 | C | 10.55714  | -1.73513 | 1.29154  |
| C                                                          | 6.21361   | 0.43291  | -0.1255  | C | 5.84036   | -5.11978 | -1.88974 | H | 10.90494  | 2.08438  | 2.05359  |
| H                                                          | 5.77795   | 1.42156  | -0.1167  | C | 6.11032   | -6.48838 | -1.80631 | H | 10.47704  | -2.79665 | 1.08462  |
| C                                                          | -4.7267   | -2.90332 | -3.1852  | H | 6.37991   | -7.02838 | -2.70884 | C | -9.45988  | 0.73367  | 1.22077  |
| H                                                          | -5.69175  | -3.20939 | -3.57147 | C | -7.52149  | 2.11856  | 0.18946  | C | -9.56495  | -0.67038 | 1.44959  |
| C                                                          | -2.66431  | 4.3054   | -1.87126 | H | -7.96722  | 3.10139  | 0.29947  | C | -10.70095 | -1.22124 | 2.044    |
| H                                                          | -3.52333  | 4.95912  | -1.83351 | C | -4.51972  | 4.47584  | 1.63583  | C | -11.76416 | -0.38531 | 2.42359  |
| C                                                          | 4.71684   | 3.37842  | -1.88545 | H | -3.5548   | 4.07227  | 1.30793  | C | -11.64403 | 0.99968  | 2.18779  |



|   |           |          |          |                                                            |           |          |          |   |          |          |          |
|---|-----------|----------|----------|------------------------------------------------------------|-----------|----------|----------|---|----------|----------|----------|
| C | -10.50867 | 1.56465  | 1.59377  | H                                                          | 6.99562   | 4.99416  | 3.20808  | H | 4.45948  | 3.46849  | -3.69543 |
| H | -10.74409 | -2.29004 | 2.20625  | C                                                          | -13.04529 | -0.92934 | 3.08764  | C | 3.86268  | 1.99228  | -2.31335 |
| H | -10.45811 | 2.63591  | 1.43275  | H                                                          | -12.4559  | 1.6571   | 2.47598  | H | 4.75004  | 1.41323  | -2.44111 |
| C | 7.77423   | 5.44605  | 1.25266  | C                                                          | 13.21744  | 0.64364  | 2.75735  | C | 2.85101  | 1.50495  | -1.44271 |
| C | 8.33095   | 4.89993  | 0.09272  | H                                                          | 12.54476  | -1.90206 | 2.06684  | C | 2.96828  | 0.2314   | -0.80075 |
| C | 8.54454   | 3.52246  | -0.03745 | C                                                          | -13.00489 | -2.46516 | 3.26548  | C | 4.22646  | -0.48434 | -0.66086 |
| C | 8.18588   | 2.66993  | 1.0264   | H                                                          | -13.93575 | -2.79458 | 3.74063  | C | 5.51301  | -0.06734 | -0.50191 |
| C | 7.62679   | 3.20432  | 2.20715  | H                                                          | -12.9164  | -2.97424 | 2.29931  | C | 6.12326  | 1.23399  | -0.31715 |
| C | 7.42845   | 4.58443  | 2.30058  | H                                                          | -12.16905 | -2.76941 | 3.90514  | H | 5.51071  | 2.11127  | -0.30331 |
| H | 8.6104    | 5.55656  | -0.72539 | C                                                          | -14.27215 | -0.57669 | 2.20342  | C | 7.44665  | 1.29992  | -0.15247 |
| C | -7.60449  | -5.54707 | 1.17756  | H                                                          | -15.18966 | -0.95167 | 2.67268  | C | 8.36533  | 2.43564  | 0.05175  |
| C | -8.3099   | -4.99397 | 0.10409  | H                                                          | -14.36828 | 0.50611  | 2.07486  | C | 8.17356  | 3.79526  | 0.131    |
| C | -8.55111  | -3.61907 | 0.01923  | H                                                          | -14.16991 | -1.03521 | 1.21396  | H | 7.19433  | 4.22376  | 0.04404  |
| C | -8.07013  | -2.77341 | 1.04086  | C                                                          | -13.21049 | -0.283   | 4.48961  | C | 9.27563  | 4.6172   | 0.32883  |
| C | -7.36351  | -3.31454 | 2.13541  | H                                                          | -14.1226  | -0.6596  | 4.9679   | H | 9.1139   | 5.67431  | 0.39071  |
| C | -7.14164  | -4.69439 | 2.1853   | H                                                          | -12.35224 | -0.52996 | 5.12373  | C | 10.57009 | 4.11445  | 0.44859  |
| H | -8.68112  | -5.64385 | -0.68226 | H                                                          | -13.28371 | 0.80662  | 4.41571  | C | 10.7512  | 2.73414  | 0.36514  |
| H | -3.67628  | -4.61876 | -3.98254 | C                                                          | 13.21601  | 2.16995  | 3.00715  | H | 11.72268 | 2.2959   | 0.45086  |
| H | 3.85515   | 5.25487  | -1.22511 | H                                                          | 14.17656  | 2.46128  | 3.44671  | C | 9.66022  | 1.91399  | 0.16931  |
| C | -6.85886  | -2.41171 | 3.24848  | H                                                          | 13.08665  | 2.72505  | 2.07142  | C | 9.58678  | 0.43949  | 0.0523   |
| H | -6.41951  | -3.00669 | 4.05466  | H                                                          | 12.42076  | 2.45714  | 3.70386  | C | 8.29608  | 0.09403  | -0.13611 |
| H | -6.09695  | -1.7184  | 2.87473  | C                                                          | 14.38895  | 0.31202  | 1.79381  | C | 7.68682  | -1.20823 | -0.26682 |
| H | -7.67623  | -1.81015 | 3.66141  | H                                                          | 15.33684  | 0.64761  | 2.23141  | H | 8.29323  | -2.09164 | -0.21709 |
| C | -7.3236   | -7.03869 | 1.2366   | H                                                          | 14.45609  | -0.76471 | 1.60882  | C | 6.35844  | -1.26948 | -0.42671 |
| H | -8.08565  | -7.60364 | 0.69018  | H                                                          | 14.24494  | 0.81969  | 0.83397  | C | 5.46823  | -2.4342  | -0.49487 |
| H | -6.34801  | -7.26404 | 0.78651  | C                                                          | 13.44382  | -0.06933 | 4.11814  | C | 4.20436  | -1.96599 | -0.59609 |
| H | -7.30619  | -7.39401 | 2.27219  | H                                                          | 14.38729  | 0.26924  | 4.56286  | C | 2.91897  | -2.64808 | -0.49197 |
| H | -6.60087  | -5.11033 | 3.02972  | H                                                          | 12.62579  | 0.16324  | 4.80838  | C | 2.78695  | -4.01956 | -0.61348 |
| C | -9.31268  | -3.04013 | -1.16111 | H                                                          | 13.4916   | -1.15551 | 3.99193  | H | 3.64163  | -4.61193 | -0.85614 |
| H | -10.18393 | -2.46917 | -0.82177 |                                                            |           |          |          | C | 1.54907  | -4.61748 | -0.44641 |
| H | -8.67634  | -2.35622 | -1.73454 | (M, M, P, P)-2                                             |           |          |          | H | 1.44066  | -5.67143 | -0.60704 |
| H | -9.65436  | -3.83839 | -1.82682 | Sum of electronic and thermal Free Energies = -4166.030491 |           |          |          | C | 0.46223  | -3.86661 | -0.07121 |
| C | 7.24072   | 2.28679  | 3.35472  | a.u.                                                       |           |          |          | H | -0.49171 | -4.33501 | 0.03701  |
| H | 6.90263   | 2.87022  | 4.21619  | C                                                          | 0.57696   | -2.48579 | 0.12773  | C | 11.74152 | 5.08677  | 0.66675  |
| H | 6.43294   | 1.60957  | 3.05491  | C                                                          | 1.78637   | -1.85909 | -0.19084 | C | 13.0957  | 4.35651  | 0.77571  |
| H | 8.09157   | 1.66814  | 3.66087  | C                                                          | 1.81407   | -0.4078  | -0.38411 | H | 13.10898 | 3.67109  | 1.61548  |
| C | 9.1501    | 2.95173  | -1.30885 | C                                                          | 0.59539   | 0.32943  | -0.25795 | H | 13.88128 | 5.0882   | 0.92809  |
| H | 10.02437  | 2.33298  | -1.07924 | C                                                          | 0.56669   | 1.67631  | -0.56427 | H | 13.3221  | 3.80575  | -0.13019 |
| H | 8.42769   | 2.31453  | -1.8323  | C                                                          | 1.64111   | 2.22365  | -1.34048 | C | 11.82347 | 6.06869  | -0.52488 |
| H | 9.45749   | 3.75634  | -1.9837  | C                                                          | 1.48541   | 3.39643  | -2.13106 | H | 11.9806  | 5.52554  | -1.44973 |
| C | 7.55918   | 6.94394  | 1.38802  | H                                                          | 0.54188   | 3.8952   | -2.13471 | H | 12.65099 | 6.7563   | -0.38246 |
| H | 7.76519   | 7.45566  | 0.44298  | C                                                          | 2.48022   | 3.84426  | -2.93766 | H | 10.91494 | 6.64991  | -0.62149 |
| H | 6.52636   | 7.16519  | 1.68123  | H                                                          | 2.32732   | 4.71424  | -3.54469 | C | 11.51763 | 5.87512  | 1.97794  |
| H | 8.22298   | 7.36352  | 2.15416  | C                                                          | 3.69205   | 3.13342  | -3.02652 | H | 10.60177 | 6.45167  | 1.94123  |

|   |          |          |          |   |           |          |          |   |           |          |          |
|---|----------|----------|----------|---|-----------|----------|----------|---|-----------|----------|----------|
| H | 12.34234 | 6.56088  | 2.1437   | C | -1.81407  | 0.4078   | 0.38413  | H | -13.10896 | -3.6711  | -1.61557 |
| H | 11.45866 | 5.19528  | 2.82015  | C | -0.59539  | -0.32943 | 0.25797  | H | -13.88127 | -5.0882  | -0.92816 |
| C | 10.7633  | -0.46061 | 0.14556  | C | -0.5667   | -1.67631 | 0.56429  | H | -13.32211 | -3.80573 | 0.1301   |
| C | 11.1639  | -0.95254 | 1.38568  | C | -1.64111  | -2.22365 | 1.3405   | C | -11.82349 | -6.06868 | 0.52484  |
| C | 12.27655 | -1.77888 | 1.45669  | C | -1.48541  | -3.39644 | 2.13108  | H | -11.98063 | -5.52552 | 1.44969  |
| H | 12.58436 | -2.1585  | 2.41181  | H | -0.54189  | -3.89521 | 2.13473  | H | -12.651   | -6.75629 | 0.38241  |
| C | 12.99371 | -2.11957 | 0.32454  | C | -2.48022  | -3.84426 | 2.93767  | H | -10.91496 | -6.6499  | 0.62147  |
| C | 12.58448 | -1.61531 | -0.90096 | H | -2.32733  | -4.71424 | 3.5447   | C | -11.5176  | -5.87513 | -1.97798 |
| H | 13.13607 | -1.86942 | -1.78619 | C | -3.69205  | -3.13342 | 3.02653  | H | -10.60174 | -6.45168 | -1.94125 |
| C | 11.47971 | -0.78923 | -1.0078  | H | -4.45948  | -3.4685  | 3.69544  | H | -12.34231 | -6.56089 | -2.14374 |
| C | 10.39382 | -0.5967  | 2.64537  | C | -3.86269  | -1.99229 | 2.31337  | H | -11.45861 | -5.1953  | -2.82019 |
| H | 10.29605 | 0.47751  | 2.74771  | H | -4.75005  | -1.41324 | 2.44112  | C | -10.76329 | 0.46061  | -0.14558 |
| H | 10.90034 | -0.9813  | 3.52146  | C | -2.85101  | -1.50495 | 1.44273  | C | -11.16389 | 0.95254  | -1.38571 |
| H | 9.39517  | -1.01727 | 2.61526  | C | -2.96829  | -0.2314  | 0.80077  | C | -12.27654 | 1.77888  | -1.45673 |
| C | 14.20275 | -3.0324  | 0.40668  | C | -4.22646  | 0.48434  | 0.66088  | H | -12.58435 | 2.15849  | -2.41185 |
| H | 14.45955 | -3.24707 | 1.43636  | C | -5.51302  | 0.06734  | 0.50193  | C | -12.99371 | 2.11957  | -0.32458 |
| H | 15.06304 | -2.57432 | -0.069   | C | -6.12326  | -1.234   | 0.31716  | C | -12.58449 | 1.6153   | 0.90092  |
| H | 14.00216 | -3.97368 | -0.09477 | H | -5.51071  | -2.11127 | 0.30332  | H | -13.13609 | 1.86941  | 1.78614  |
| C | 11.05096 | -0.25141 | -2.36166 | C | -7.44665  | -1.29992 | 0.15246  | C | -11.47972 | 0.78923  | 1.00777  |
| H | 10.07785 | -0.64108 | -2.63755 | C | -8.36533  | -2.43564 | -0.05176 | C | -10.3938  | 0.5967   | -2.64539 |
| H | 11.76305 | -0.53567 | -3.12597 | C | -8.17355  | -3.79526 | -0.131   | H | -10.29603 | -0.47751 | -2.74773 |
| H | 10.97958 | 0.82972  | -2.34226 | H | -7.19432  | -4.22376 | -0.04404 | H | -10.90031 | 0.98131  | -3.52148 |
| C | 5.96625  | -3.82884 | -0.37929 | C | -9.27562  | -4.6172  | -0.32885 | H | -9.39515  | 1.01726  | -2.61527 |
| C | 6.07323  | -4.43107 | 0.87353  | H | -9.11389  | -5.67431 | -0.39073 | C | -14.20273 | 3.03243  | -0.40673 |
| C | 6.55531  | -5.72894 | 0.96257  | C | -10.57009 | -4.11445 | -0.44862 | H | -14.45983 | 3.24668  | -1.43643 |
| H | 6.63384  | -6.19163 | 1.92762  | C | -10.7512  | -2.73414 | -0.36518 | H | -15.06289 | 2.5746   | 0.0694   |
| C | 6.9339   | -6.43637 | -0.1645  | H | -11.72267 | -2.2959  | -0.45091 | H | -14.00192 | 3.9739   | 0.09426  |
| C | 6.82294  | -5.82359 | -1.40302 | C | -9.66022  | -1.91399 | -0.16933 | C | -11.05098 | 0.2514   | 2.36163  |
| H | 7.11189  | -6.3621  | -2.28563 | C | -9.58677  | -0.43949 | -0.05232 | H | -10.07787 | 0.64106  | 2.63753  |
| C | 6.34712  | -4.52893 | -1.52653 | C | -8.29608  | -0.09403 | 0.1361   | H | -11.76307 | 0.53567  | 3.12594  |
| C | 5.64893  | -3.68599 | 2.12594  | C | -7.68682  | 1.20823  | 0.26681  | H | -10.97961 | -0.82973 | 2.34223  |
| H | 6.16816  | -2.73873 | 2.2051   | H | -8.29323  | 2.09164  | 0.21708  | C | -5.96625  | 3.82884  | 0.37932  |
| H | 5.86461  | -4.27334 | 3.00971  | C | -6.35844  | 1.26948  | 0.42671  | C | -6.07322  | 4.43108  | -0.8735  |
| H | 4.58533  | -3.4792  | 2.10104  | C | -5.46823  | 2.4342   | 0.4949   | C | -6.5553   | 5.72895  | -0.96253 |
| C | 7.48262  | -7.84656 | -0.054   | C | -4.20437  | 1.96599  | 0.59611  | H | -6.63382  | 6.19165  | -1.92758 |
| H | 7.07705  | -8.48198 | -0.83298 | C | -2.91897  | 2.64808  | 0.49199  | C | -6.93391  | 6.43637  | 0.16454  |
| H | 7.23674  | -8.28606 | 0.90476  | C | -2.78695  | 4.01956  | 0.6135   | C | -6.82295  | 5.82359  | 1.40305  |
| H | 8.56366  | -7.83972 | -0.1543  | H | -3.64164  | 4.61193  | 0.85616  | H | -7.11191  | 6.36209  | 2.28566  |
| C | 6.22709  | -3.8855  | -2.89681 | C | -1.54908  | 4.61748  | 0.44643  | C | -6.34713  | 4.52892  | 1.52657  |
| H | 5.19477  | -3.63649 | -3.11455 | H | -1.44066  | 5.67143  | 0.60707  | C | -5.6489   | 3.68601  | -2.12591 |
| H | 6.58828  | -4.55719 | -3.66544 | C | -0.46223  | 3.86661  | 0.07124  | H | -6.16814  | 2.73875  | -2.20508 |
| H | 6.80218  | -2.96839 | -2.9425  | H | 0.49171   | 4.33501  | -0.03698 | H | -5.86457  | 4.27337  | -3.00968 |
| C | -0.57696 | 2.48579  | -0.12771 | C | -11.74151 | -5.08677 | -0.66679 | H | -4.58531  | 3.47922  | -2.10099 |
| C | -1.78637 | 1.85909  | 0.19086  | C | -13.09569 | -4.35651 | -0.77579 | C | -7.48263  | 7.84657  | 0.05404  |

|                                              |              |          |          |   |          |          |          |   |          |          |          |
|----------------------------------------------|--------------|----------|----------|---|----------|----------|----------|---|----------|----------|----------|
| H                                            | -7.07709     | 8.48197  | 0.83305  | H | 8.45956  | -1.98742 | -0.1     | C | 6.23445  | -3.84436 | -0.08964 |
| H                                            | -7.2367      | 8.28609  | -0.9047  | C | 6.46782  | -1.30689 | 0.33937  | C | 6.74235  | -4.66006 | 0.94208  |
| H                                            | -8.56367     | 7.83972  | 0.1543   | C | 5.6573   | -2.51563 | 0.23537  | C | 7.29972  | -5.90312 | 0.61791  |
| C                                            | -6.22712     | 3.88548  | 2.89684  | C | 4.33332  | -2.14198 | 0.43457  | H | 7.68725  | -6.53094 | 1.41409  |
| H                                            | -5.1948      | 3.63647  | 3.11459  | C | 3.11029  | -2.91272 | 0.32814  | C | 7.36898  | -6.34964 | -0.70441 |
| H                                            | -6.58831     | 4.55717  | 3.66547  | C | 3.15208  | -4.30467 | 0.22897  | C | 6.86606  | -5.52406 | -1.71772 |
| H                                            | -6.8022      | 2.96837  | 2.94251  | H | 4.10433  | -4.8117  | 0.27121  | H | 6.91598  | -5.85568 | -2.75051 |
|                                              |              |          |          | C | 1.9692   | -5.00941 | 0.07639  | C | 6.30031  | -4.27876 | -1.43235 |
| TS-PH2-A                                     |              |          |          | H | 1.98419  | -6.09165 | 0.0203   | C | 6.66683  | -4.20284 | 2.38883  |
| Sum of electronic and thermal Free Energies= | -4166.010037 |          |          | C | 0.75716  | -4.34491 | -0.02549 | H | 7.2047   | -3.25855 | 2.52743  |
| a.u.                                         |              |          |          | H | -0.09162 | -4.97249 | -0.15853 | H | 7.1031   | -4.95497 | 3.05308  |
| C                                            | 0.6304       | -2.93669 | 0.04064  | C | 11.54112 | 5.44412  | 0.07314  | H | 5.62597  | -4.03343 | 2.68797  |
| C                                            | 1.85389      | -2.21826 | 0.28163  | C | 12.92923 | 4.82518  | -0.21321 | C | 7.97737  | -7.69934 | -1.04537 |
| C                                            | 1.82566      | -0.80496 | 0.57574  | H | 13.22312 | 4.12767  | 0.57905  | H | 7.24674  | -8.33878 | -1.55536 |
| C                                            | 0.59079      | -0.09344 | 0.43929  | H | 13.67614 | 5.62574  | -0.25738 | H | 8.31165  | -8.21671 | -0.14101 |
| C                                            | 0.57642      | 1.29232  | 0.70862  | H | 12.93798 | 4.29641  | -1.17283 | H | 8.84118  | -7.57995 | -1.7105  |
| C                                            | 1.61252      | 1.85122  | 1.54007  | C | 11.20905 | 6.43951  | -1.07148 | C | 5.74432  | -3.40805 | -2.54492 |
| C                                            | 1.40325      | 3.01613  | 2.33058  | H | 11.15374 | 5.91001  | -2.02872 | H | 4.66069  | -3.28744 | -2.43207 |
| H                                            | 0.4439       | 3.51201  | 2.28315  | H | 11.98991 | 7.20678  | -1.13759 | H | 5.94469  | -3.85787 | -3.52204 |
| C                                            | 2.36879      | 3.46742  | 3.20524  | H | 10.25028 | 6.93803  | -0.89651 | H | 6.19195  | -2.40874 | -2.51791 |
| H                                            | 2.17718      | 4.33979  | 3.81892  | C | 11.62128 | 6.20904  | 1.42199  | C | -0.49236 | 2.11352  | 0.18542  |
| C                                            | 3.57958      | 2.7578   | 3.34953  | H | 10.67053 | 6.69887  | 1.65511  | C | -1.71191 | 1.49178  | -0.17152 |
| H                                            | 4.31617      | 3.08678  | 4.07318  | H | 12.40216 | 6.97723  | 1.36944  | C | -1.7994  | 0.03919  | -0.2155  |
| C                                            | 3.80099      | 1.61175  | 2.61443  | H | 11.86243 | 5.51684  | 2.23589  | C | -0.61671 | -0.77307 | -0.01787 |
| H                                            | 4.69646      | 1.02775  | 2.77446  | C | 10.85564 | -0.18877 | -0.30523 | C | -0.64857 | -2.19513 | -0.15692 |
| C                                            | 2.83951      | 1.14001  | 1.68287  | C | 11.65025 | -0.66067 | 0.75891  | C | -1.90648 | -2.80023 | -0.6229  |
| C                                            | 3.00204      | -0.11099 | 0.98323  | C | 12.78856 | -1.42265 | 0.47177  | C | -2.17415 | -4.19533 | -0.82304 |
| C                                            | 4.27218      | -0.70827 | 0.73329  | H | 13.40049 | -1.78486 | 1.29184  | H | -1.54437 | -4.94648 | -0.40051 |
| C                                            | 5.58703      | -0.18093 | 0.63413  | C | 13.15337 | -1.7244  | -0.84312 | C | -3.26849 | -4.66755 | -1.51359 |
| C                                            | 6.11728      | 1.13963  | 0.63051  | C | 12.35467 | -1.24358 | -1.88754 | H | -3.39651 | -5.73727 | -1.63318 |
| H                                            | 5.46552      | 1.98846  | 0.79412  | H | 12.62819 | -1.4652  | -2.91468 | C | -4.19719 | -3.77404 | -2.07664 |
| C                                            | 7.46209      | 1.31463  | 0.41443  | C | 11.21124 | -0.47918 | -1.64046 | H | -5.00134 | -4.12923 | -2.70939 |
| C                                            | 8.30447      | 2.51182  | 0.36196  | C | 11.27361 | -0.34702 | 2.19694  | C | -4.075   | -2.44093 | -1.7739  |
| C                                            | 8.04599      | 3.86948  | 0.52039  | H | 11.18946 | 0.73464  | 2.34997  | H | -4.79345 | -1.72767 | -2.15049 |
| H                                            | 7.04191      | 4.22646  | 0.72141  | H | 12.0266  | -0.74123 | 2.8859   | C | -3.0105  | -1.94476 | -0.96889 |
| C                                            | 9.10364      | 4.77872  | 0.41855  | H | 10.30377 | -0.79047 | 2.44946  | C | -3.01945 | -0.56303 | -0.58475 |
| H                                            | 8.88947      | 5.83364  | 0.54569  | C | 14.38221 | -2.56666 | -1.14034 | C | -4.21959 | 0.23461  | -0.58184 |
| C                                            | 10.43347     | 4.37502  | 0.15945  | H | 14.99346 | -2.69685 | -0.24206 | C | -5.59227 | -0.08689 | -0.45015 |
| C                                            | 10.69267     | 3.00828  | -0.00248 | H | 15.00138 | -2.09669 | -1.9129  | C | -6.29351 | -1.28298 | -0.11411 |
| H                                            | 11.69292     | 2.6481   | -0.20331 | H | 14.09139 | -3.56135 | -1.50105 | H | -5.75014 | -2.20783 | 0.02854  |
| C                                            | 9.64563      | 2.08427  | 0.09781  | C | 10.36013 | 0.03423  | -2.78935 | C | -7.65607 | -1.23508 | 0.02606  |
| C                                            | 9.65654      | 0.63511  | -0.02228 | H | 9.35145  | -0.39208 | -2.74693 | C | -8.65098 | -2.26121 | 0.35834  |
| C                                            | 8.34519      | 0.17664  | 0.17063  | H | 10.81043 | -0.23294 | -3.74998 | C | -8.56251 | -3.61829 | 0.64673  |
| C                                            | 7.81725      | -1.14174 | 0.12216  | H | 10.25743 | 1.12397  | -2.74034 | H | -7.60432 | -4.12591 | 0.65628  |

|   |           |          |          |                                              |              |          |          |   |          |          |          |
|---|-----------|----------|----------|----------------------------------------------|--------------|----------|----------|---|----------|----------|----------|
| C | -9.73382  | -4.32999 | 0.93037  | H                                            | -10.3529     | 0.1535   | -2.78285 | H | 4.05898  | 3.10659  | 3.78307  |
| H | -9.65181  | -5.38722 | 1.15524  | C                                            | -14.06392    | 3.68178  | -0.2634  | C | 3.63305  | 1.64085  | 2.28547  |
| C | -11.00988 | -3.72445 | 0.93668  | H                                            | -14.93015    | 3.27663  | -0.79737 | H | 4.48517  | 1.02574  | 2.53824  |
| C | -11.0958  | -2.35472 | 0.65124  | H                                            | -14.38887    | 3.99666  | 0.73318  | C | 2.75544  | 1.19618  | 1.26435  |
| H | -12.04798 | -1.84084 | 0.65159  | H                                            | -13.72103    | 4.57292  | -0.80499 | C | 2.96946  | -0.05336 | 0.56291  |
| C | -9.93478  | -1.63065 | 0.3626   | C                                            | -10.28113    | 1.52895  | 2.33375  | C | 4.2549   | -0.65377 | 0.37326  |
| C | -9.7608   | -0.21833 | 0.04568  | H                                            | -9.24928     | 1.8499   | 2.15099  | C | 5.58046  | -0.14427 | 0.45701  |
| C | -8.39541  | 0.01283  | -0.15641 | H                                            | -10.70521    | 2.1618   | 3.11897  | C | 6.1269   | 1.16106  | 0.61781  |
| C | -7.70362  | 1.21944  | -0.45391 | H                                            | -10.24384    | 0.49595  | 2.69652  | H | 5.47349  | 2.01176  | 0.75784  |
| H | -8.24399  | 2.15417  | -0.56035 | C                                            | -5.77821     | 3.68183  | -0.84648 | C | 7.48989  | 1.32322  | 0.58148  |
| C | -6.33497  | 1.16744  | -0.57398 | C                                            | -5.95934     | 4.26252  | -2.12017 | C | 8.34528  | 2.50449  | 0.72038  |
| C | -5.37881  | 2.25659  | -0.73569 | C                                            | -6.34228     | 5.60464  | -2.21041 | C | 8.08381  | 3.85336  | 0.93796  |
| C | -4.1099   | 1.69667  | -0.68862 | H                                            | -6.47574     | 6.0502   | -3.19139 | H | 7.0663   | 4.21542  | 1.03626  |
| C | -2.8089   | 2.31822  | -0.57268 | C                                            | -6.55592     | 6.38178  | -1.06649 | C | 9.15565  | 4.74737  | 1.02648  |
| C | -2.61413  | 3.69377  | -0.7527  | C                                            | -6.37419     | 5.79044  | 0.18781  | H | 8.9387   | 5.7965   | 1.19121  |
| H | -3.44865  | 4.30237  | -1.06995 | H                                            | -6.53134     | 6.38249  | 1.08414  | C | 10.50304 | 4.33573  | 0.90947  |
| C | -1.3619   | 4.26849  | -0.53268 | C                                            | -5.98977     | 4.45135  | 0.31713  | C | 10.76575 | 2.97679  | 0.69575  |
| H | -1.21016  | 5.32277  | -0.73142 | C                                            | -5.7224      | 3.44166  | -3.37617 | H | 11.77949 | 2.60976  | 0.60461  |
| C | -0.31617  | 3.4956   | -0.05244 | H                                            | -6.36185     | 2.55208  | -3.3856  | C | 9.70423  | 2.06935  | 0.59766  |
| H | 0.65788   | 3.93586  | 0.10862  | H                                            | -5.93567     | 4.03595  | -4.26976 | C | 9.71442  | 0.6323   | 0.37481  |
| C | -12.25055 | -4.58162 | 1.25834  | H                                            | -4.6826      | 3.09835  | -3.42506 | C | 8.38328  | 0.18899  | 0.36556  |
| C | -13.55979 | -3.76102 | 1.19139  | C                                            | -7.0041      | 7.82826  | -1.18605 | C | 7.84829  | -1.10612 | 0.13565  |
| H | -13.71345 | -3.34175 | 0.19078  | H                                            | -6.691       | 8.40952  | -0.31276 | H | 8.50167  | -1.94531 | -0.07865 |
| H | -14.40629 | -4.41786 | 1.42073  | H                                            | -6.5838      | 8.29676  | -2.08213 | C | 6.47953  | -1.25611 | 0.16368  |
| H | -13.55434 | -2.94446 | 1.92186  | H                                            | -8.09808     | 7.88741  | -1.25646 | C | 5.67872  | -2.42897 | -0.16029 |
| C | -12.11435 | -5.16235 | 2.69186  | C                                            | -5.77596     | 3.83892  | 1.69023  | C | 4.34267  | -2.05558 | -0.07838 |
| H | -12.05633 | -4.35036 | 3.42473  | H                                            | -4.73749     | 3.50836  | 1.80578  | C | 3.14438  | -2.77744 | -0.46234 |
| H | -12.98483 | -5.78702 | 2.9258   | H                                            | -6.00052     | 4.56735  | 2.47522  | C | 3.19928  | -4.07221 | -0.99874 |
| H | -11.21304 | -5.77662 | 2.7847   | H                                            | -6.41762     | 2.96213  | 1.83042  | H | 4.15138  | -4.57918 | -1.04613 |
| C | -12.35543 | -5.74267 | 0.23282  |                                              |              |          |          | C | 2.0579   | -4.65907 | -1.53761 |
| H | -11.467   | -6.38139 | 0.26408  |                                              |              |          |          | H | 2.13112  | -5.61869 | -2.03584 |
| H | -13.23248 | -6.36048 | 0.45986  | (M, P, P, P)-2                               |              |          |          | C | 0.83183  | -4.01226 | -1.46627 |
| H | -12.45909 | -5.34365 | -0.78202 | Sum of electronic and thermal Free Energies= | -4166.021275 |          |          | H | -0.02801 | -4.45073 | -1.94859 |
| C | -10.85302 | 0.77924  | -0.03151 | a.u                                          |              |          |          | C | 11.62408 | 5.38931  | 1.01334  |
| C | -11.64366 | 0.86452  | -1.19835 | C                                            | 0.70105      | -2.76394 | -0.81888 | C | 13.03028 | 4.76     | 0.87742  |
| C | -12.67894 | 1.80197  | -1.25022 | C                                            | 1.89017      | -2.09601 | -0.39668 | H | 13.21643 | 4.02982  | 1.67292  |
| H | -13.28464 | 1.86822  | -2.14876 | C                                            | 1.82096      | -0.72689 | 0.06618  | H | 13.7855  | 5.5501   | 0.95469  |
| C | -12.95024 | 2.65286  | -0.17273 | C                                            | 0.58794      | -0.00926 | -0.09978 | H | 13.7855  | 5.5501   | 0.95469  |
| C | -12.16137 | 2.54959  | 0.97675  | C                                            | 0.54336      | 1.37052  | 0.16532  | H | 13.15139 | 4.26595  | -0.09302 |
| H | -12.36699 | 3.1956   | 1.82444  | C                                            | 1.5564       | 1.93803  | 1.02008  | C | 11.44908 | 6.43555  | -0.12056 |
| C | -11.11367 | 1.62636  | 1.06601  | C                                            | 1.3259       | 3.12466  | 1.77084  | H | 11.5133  | 5.94765  | -1.09904 |
| C | -11.35754 | -0.03643 | -2.38773 | H                                            | 0.39156      | 3.65142  | 1.63724  | H | 12.23747 | 7.19482  | -0.05248 |
| H | -11.40184 | -1.09215 | -2.09901 | C                                            | 2.22678      | 3.55744  | 2.72083  | H | 10.47898 | 6.93733  | -0.04744 |
| H | -12.08445 | 0.13962  | -3.18617 | H                                            | 2.01533      | 4.44894  | 3.29958  | C | 11.54222 | 6.0981   | 2.39249  |
|   |           |          |          | C                                            | 3.3855       | 2.8014   | 2.99074  | H | 10.57693 | 6.59732  | 2.52409  |

|   |          |          |          |   |           |          |          |   |           |          |          |
|---|----------|----------|----------|---|-----------|----------|----------|---|-----------|----------|----------|
| H | 12.33412 | 6.85267  | 2.4712   | C | -1.8587   | 0.02732  | -0.59882 | H | -13.66693 | -3.3348  | 1.24111  |
| H | 11.66813 | 5.36977  | 3.20076  | C | -0.62353  | -0.70336 | -0.50127 | H | -14.23158 | -4.22029 | 2.67173  |
| C | 10.92948 | -0.19523 | 0.1899   | C | -0.59744  | -2.10171 | -0.67098 | H | -13.35833 | -2.68913 | 2.87396  |
| C | 11.47564 | -0.89942 | 1.28584  | C | -1.84713  | -2.81373 | -0.77323 | C | -11.82929 | -4.77808 | 3.8234   |
| C | 12.63082 | -1.66155 | 1.09529  | C | -1.95073  | -4.23139 | -0.63108 | H | -11.70818 | -3.87112 | 4.42552  |
| H | 13.05259 | -2.1985  | 1.93955  | H | -1.10294  | -4.7769  | -0.24274 | H | -12.67243 | -5.35558 | 4.22121  |
| C | 13.25599 | -1.744   | -0.1549  | C | -3.10976  | -4.90345 | -0.94701 | H | -10.92093 | -5.3812  | 3.92103  |
| C | 12.70258 | -1.03964 | -1.2272  | H | -3.16629  | -5.97844 | -0.82237 | C | -12.2757  | -5.70091 | 1.5023   |
| H | 13.17574 | -1.09417 | -2.20254 | C | -4.2177   | -4.18744 | -1.45363 | H | -11.37762 | -6.32547 | 1.54274  |
| C | 11.54816 | -0.26276 | -1.07517 | H | -5.09068  | -4.71729 | -1.81632 | H | -13.11882 | -6.28353 | 1.89259  |
| C | 10.82191 | -0.81899 | 2.65519  | C | -4.19555  | -2.81074 | -1.45226 | H | -12.47614 | -5.45005 | 0.45509  |
| H | 10.70845 | 0.22417  | 2.97042  | H | -5.05022  | -2.25559 | -1.80941 | C | -10.88947 | 0.71613  | 0.18356  |
| H | 11.42576 | -1.34675 | 3.39937  | C | -3.06128  | -2.08354 | -0.99147 | C | -11.5984  | 0.81449  | -1.03123 |
| H | 9.82213  | -1.26695 | 2.63756  | C | -3.08593  | -0.65275 | -0.80681 | C | -12.65368 | 1.72793  | -1.12973 |
| C | 14.50707 | -2.58707 | -0.33277 | C | -4.29823  | 0.13175  | -0.77959 | H | -13.20184 | 1.80034  | -2.06382 |
| H | 15.28952 | -2.27743 | 0.37015  | C | -5.65484  | -0.17662 | -0.5074  | C | -13.01864 | 2.5425   | -0.05371 |
| H | 14.90201 | -2.49099 | -1.34868 | C | -6.31458  | -1.3118  | 0.05307  | C | -12.30768 | 2.42641  | 1.1462   |
| H | 14.29057 | -3.64662 | -0.14929 | H | -5.74881  | -2.19819 | 0.30744  | H | -12.58308 | 3.04802  | 1.99265  |
| C | 10.95655 | 0.47987  | -2.26122 | C | -7.66513  | -1.25343 | 0.28054  | C | -11.24831 | 1.52489  | 1.28343  |
| H | 9.95673  | 0.09713  | -2.49692 | C | -8.61448  | -2.22543 | 0.83304  | C | -11.22443 | -0.0635  | -2.21346 |
| H | 11.59122 | 0.36073  | -3.14435 | C | -8.48426  | -3.52849 | 1.30076  | H | -11.22319 | -1.12102 | -1.92704 |
| H | 10.85508 | 1.54826  | -2.04249 | H | -7.52089  | -4.02647 | 1.30554  | H | -11.93331 | 0.07682  | -3.03489 |
| C | 6.28384  | -3.7292  | -0.54649 | C | -9.61881  | -4.19666 | 1.77459  | H | -10.21927 | 0.17949  | -2.57634 |
| C | 6.54818  | -4.70206 | 0.43946  | H | -9.50339  | -5.2099  | 2.14185  | C | -14.1475  | 3.55008  | -0.18723 |
| C | 7.13747  | -5.91397 | 0.06132  | C | -10.90003 | -3.60195 | 1.79409  | H | -14.81077 | 3.28737  | -1.01726 |
| H | 7.33667  | -6.66295 | 0.82139  | C | -11.02996 | -2.29008 | 1.31824  | H | -14.74374 | 3.59563  | 0.73048  |
| C | 7.47241  | -6.17978 | -1.26981 | H | -11.98925 | -1.78976 | 1.3094   | H | -13.74664 | 4.55382  | -0.37878 |
| C | 7.20347  | -5.20312 | -2.23612 | C | -9.90472  | -1.60709 | 0.8452   | C | -10.48564 | 1.42078  | 2.59325  |
| H | 7.45405  | -5.39613 | -3.27482 | C | -9.77844  | -0.25549 | 0.31594  | H | -9.43574  | 1.703    | 2.45399  |
| C | 6.61769  | -3.98041 | -1.89553 | C | -8.43599  | -0.04884 | -0.02157 | H | -10.92565 | 2.0801   | 3.34729  |
| C | 6.18114  | -4.4418  | 1.89004  | C | -7.78008  | 1.11308  | -0.51366 | H | -10.50106 | 0.39322  | 2.97289  |
| H | 6.67001  | -3.53287 | 2.25763  | H | -8.3345   | 2.02933  | -0.68734 | C | -5.92504  | 3.52613  | -1.28024 |
| H | 6.4849   | -5.28292 | 2.52047  | C | -6.42294  | 1.04975  | -0.72625 | C | -6.2129   | 3.98483  | -2.58248 |
| H | 5.09976  | -4.29817 | 1.99547  | C | -5.49587  | 2.12107  | -1.06745 | C | -6.62563  | 5.30975  | -2.76393 |
| C | 8.13831  | -7.48798 | -1.66036 | C | -4.21734  | 1.58278  | -1.04467 | H | -6.84274  | 5.66183  | -3.76759 |
| H | 7.73545  | -7.86709 | -2.60593 | C | -2.9294   | 2.24777  | -1.03505 | C | -6.76429  | 6.1859   | -1.68291 |
| H | 7.98601  | -8.25044 | -0.89005 | C | -2.77443  | 3.6155   | -1.30231 | C | -6.47648  | 5.71409  | -0.39715 |
| H | 9.21932  | -7.34663 | -1.78797 | H | -3.63094  | 4.18631  | -1.6307  | H | -6.57499  | 6.38412  | 0.45151  |
| C | 6.31137  | -2.94458 | -2.9628  | C | -1.53232  | 4.23194  | -1.14697 | C | -6.0602   | 4.39748  | -0.17753 |
| H | 5.23142  | -2.76591 | -3.02487 | H | -1.41713  | 5.27887  | -1.40172 | C | -6.05945  | 3.05417  | -3.77332 |
| H | 6.66569  | -3.28336 | -3.94097 | C | -0.44773  | 3.51543  | -0.65861 | H | -6.67916  | 2.15921  | -3.64934 |
| H | 6.78987  | -1.98823 | -2.72642 | H | 0.5157    | 3.99407  | -0.54613 | H | -6.35484  | 3.56004  | -4.69742 |
| C | -0.57186 | 2.1428   | -0.35664 | C | -12.09718 | -4.40578 | 2.33992  | H | -5.02005  | 2.72122  | -3.8741  |
| C | -1.79654 | 1.47834  | -0.63293 | C | -13.41794 | -3.60376 | 2.27364  | C | -7.2435   | 7.61205  | -1.89293 |

|                                                           |           |          |          |      |           |          |          |          |          |          |          |
|-----------------------------------------------------------|-----------|----------|----------|------|-----------|----------|----------|----------|----------|----------|----------|
| H                                                         | -6.72828  | 8.30307  | -1.21712 | C    | -5.72446  | 3.91625  | 1.22298  | H        | -6.31287 | 3.03     | 1.48294  |
| H                                                         | -7.06452  | 7.93817  | -2.92237 | H    | -4.66577  | 3.63981  | 1.28838  |          |          |          |          |
| H                                                         | -8.32069  | 7.68907  | -1.696   | H    | -5.92645  | 4.70122  | 1.95799  | TS-PH2-B |          |          |          |
| Sum of electronic and thermal Free Energies= -4165.998926 |           |          |          | a.u. |           |          |          |          |          |          |          |
| C                                                         | -0.81661  | -2.74294 | 0.56209  | C    | -1.995    | -4.74777 | 1.29209  | H        | -7.11696 | -6.37088 | -1.15683 |
| C                                                         | -2.02183  | -2.00612 | 0.69046  | H    | -1.97126  | -5.78813 | 1.59422  | C        | -7.46115 | -6.31245 | 0.96741  |
| C                                                         | -1.96912  | -0.56025 | 0.68572  | C    | -0.81512  | -4.10394 | 0.94585  | C        | -7.33452 | -5.53476 | 2.12176  |
| C                                                         | -0.69599  | 0.09931  | 0.55231  | H    | 0.1235    | -4.63591 | 0.99916  | H        | -7.66753 | -5.93503 | 3.07418  |
| C                                                         | -0.63867  | 1.49849  | 0.64915  | C    | -11.61646 | 5.21148  | -1.85853 | C        | -6.79001 | -4.24559 | 2.07891  |
| C                                                         | -1.74056  | 2.20369  | 1.26389  | C    | -13.00913 | 4.54429  | -1.94201 | C        | -5.99402 | -3.9441  | -1.66272 |
| C                                                         | -1.56895  | 3.46178  | 1.90697  | H    | -13.01582 | 3.72938  | -2.67432 | H        | -6.47811 | -2.98702 | -1.88504 |
| H                                                         | -0.58445  | 3.90622  | 1.92627  | H    | -13.74581 | 5.29176  | -2.25708 | H        | -6.21333 | -4.64624 | -2.47276 |
| C                                                         | -2.60806  | 4.07762  | 2.57162  | H    | -13.31834 | 4.14925  | -0.96791 | H        | -4.91271 | -3.7673  | -1.63655 |
| H                                                         | -2.44259  | 5.02294  | 3.07501  | C    | -11.70064 | 6.38088  | -0.84053 | C        | -8.06892 | -7.70368 | 1.02269  |
| C                                                         | -3.86598  | 3.44704  | 2.65277  | H    | -11.95633 | 6.00025  | 0.15423  | H        | -9.03178 | -7.72665 | 0.49727  |
| H                                                         | -4.67005  | 3.91106  | 3.21183  | H    | -12.47348 | 7.0926   | -1.15472 | H        | -8.239   | -8.01507 | 2.05778  |
| C                                                         | -4.05355  | 2.20747  | 2.079    | H    | -10.74783 | 6.9154   | -0.7716  | H        | -7.409   | -8.43823 | 0.54661  |
| H                                                         | -4.99077  | 1.68763  | 2.21356  | C    | -11.26121 | 5.76851  | -3.2638  | C        | -6.65374 | -3.42342 | 3.34906  |
| C                                                         | -3.01273  | 1.55799  | 1.36277  | H    | -10.29558 | 6.28396  | -3.25247 | H        | -5.6     | -3.20547 | 3.5587   |
| C                                                         | -3.15037  | 0.1988   | 0.89164  | H    | -12.02968 | 6.48071  | -3.5877  | H        | -7.07437 | -3.96248 | 4.20328  |
| C                                                         | -4.41221  | -0.46804 | 0.74717  | H    | -11.20868 | 4.95174  | -3.99164 | H        | -7.17295 | -2.46399 | 3.24914  |
| C                                                         | -5.71971  | -0.00086 | 0.47778  | C    | -10.97838 | -0.26457 | -0.44795 | C        | 0.5547   | 2.17498  | 0.18967  |
| C                                                         | -6.24114  | 1.26494  | 0.08275  | C    | -11.22428 | -1.10202 | -1.55632 | C        | 1.76796  | 1.43966  | 0.03881  |
| H                                                         | -5.58228  | 2.12016  | -0.00473 | C    | -12.37589 | -1.89673 | -1.56458 | C        | 1.78372  | -0.0089  | 0.04297  |
| C                                                         | -7.58121  | 1.37266  | -0.18879 | H    | -12.56898 | -2.53437 | -2.42157 | C        | 0.50363  | -0.66444 | 0.22758  |
| C                                                         | -8.41586  | 2.50241  | -0.60853 | C    | -13.28343 | -1.88183 | -0.50125 | C        | 0.39498  | -2.05968 | 0.1205   |
| C                                                         | -8.14538  | 3.83991  | -0.87631 | C    | -13.02529 | -1.04202 | 0.58788  | C        | 1.50137  | -2.78447 | -0.42647 |
| H                                                         | -7.13973  | 4.23515  | -0.78503 | H    | -13.722   | -1.01789 | 1.42013  | C        | 1.31676  | -4.0734  | -1.00773 |
| C                                                         | -9.19312  | 4.67832  | -1.27149 | C    | -11.88802 | -0.23092 | 0.6319   | H        | 0.30599  | -4.42562 | -1.15562 |
| H                                                         | -8.97065  | 5.71836  | -1.47931 | C    | -10.2645  | -1.12874 | -2.73447 | C        | 2.38032  | -4.84757 | -1.40979 |
| C                                                         | -10.52237 | 4.22067  | -1.41212 | H    | -10.07077 | -0.1148  | -3.10096 | H        | 2.21578  | -5.81392 | -1.87076 |
| C                                                         | -10.79276 | 2.87203  | -1.14372 | H    | -10.68032 | -1.72446 | -3.55251 | C        | 3.68421  | -4.36201 | -1.19885 |
| H                                                         | -11.79255 | 2.47084  | -1.24425 | H    | -9.3005   | -1.56312 | -2.4462  | H        | 4.54469  | -4.98319 | -1.41952 |
| C                                                         | -9.75667  | 2.02122  | -0.74311 | C    | -14.51085 | -2.77655 | -0.51294 | C        | 3.86593  | -3.07467 | -0.74473 |
| C                                                         | -9.77612  | 0.60054  | -0.42047 | H    | -15.36694 | -2.27495 | -0.04929 | H        | 4.8517   | -2.72367 | -0.58195 |
| C                                                         | -8.4704   | 0.21593  | -0.08967 | H    | -14.3179  | -3.70073 | 0.04714  | C        | 2.80606  | -2.19221 | -0.43934 |
| C                                                         | -7.9515   | -1.06121 | 0.2609   | H    | -14.78491 | -3.05308 | -1.53592 | C        | 2.99574  | -0.76532 | -0.19527 |
| H                                                         | -8.60203  | -1.92829 | 0.30505  | C    | -11.62045 | 0.65799  | 1.83455  | C        | 4.28362  | -0.04422 | -0.24572 |
| C                                                         | -6.60384  | -1.16425 | 0.5162   | H    | -10.68112 | 0.37389  | 2.32269  | C        | 5.7178   | -0.34988 | -0.29295 |
| C                                                         | -5.79387  | -2.35065 | 0.77715  | H    | -12.43173 | 0.57198  | 2.56357  | C        | 6.59499  | -1.45415 | -0.56795 |
| C                                                         | -4.4732   | -1.93532 | 0.87115  | H    | -11.5288  | 1.70716  | 1.53357  | H        | 6.25084  | -2.40836 | -0.92277 |
| C                                                         | -3.24425  | -2.69696 | 0.96051  | C    | -6.35503  | -3.72349 | 0.8436   | C        | 7.96132  | -1.32752 | -0.48134 |
| C                                                         | -3.21226  | -4.06666 | 1.24978  | C    | -6.47532  | -4.49637 | -0.33259 | C        | 9.0388   | -2.28992 | -0.72598 |
| H                                                         | -4.1387   | -4.58061 | 1.46349  | C    | -7.02591  | -5.77818 | -0.25157 | C        | 9.06234  | -3.63134 | -1.09502 |

|   |          |          |          |                                                            |          |          |          |   |           |          |          |
|---|----------|----------|----------|------------------------------------------------------------|----------|----------|----------|---|-----------|----------|----------|
| H | 8.14265  | -4.18134 | -1.26271 | H                                                          | 11.45605 | -1.16374 | 2.1149   | C | -4.31615  | -3.51878 | -3.3161  |
| C | 10.29443 | -4.27243 | -1.25222 | H                                                          | 11.91935 | 0.02995  | 3.3499   | H | -5.24362  | -3.94968 | -3.67455 |
| H | 10.2983  | -5.31727 | -1.54017 | C                                                          | 13.98034 | 3.87364  | 0.91277  | C | -4.33111  | -2.31299 | -2.64747 |
| C | 11.52915 | -3.61143 | -1.05406 | H                                                          | 14.23982 | 4.41952  | 0.00061  | H | -5.26231  | -1.78168 | -2.51499 |
| C | 11.50676 | -2.26255 | -0.68221 | H                                                          | 13.59621 | 4.59577  | 1.64415  | C | -3.13175  | -1.70498 | -2.18935 |
| H | 12.42345 | -1.70944 | -0.52603 | H                                                          | 14.89668 | 3.43454  | 1.32359  | C | -3.1225   | -0.35428 | -1.67529 |
| C | 10.28095 | -1.60573 | -0.51184 | C                                                          | 10.64646 | 1.71702  | -2.23718 | C | -4.29189  | 0.34736  | -1.2358  |
| C | 9.99591  | -0.22933 | -0.14662 | H                                                          | 9.60144  | 2.04058  | -2.16388 | C | -5.50616  | -0.07723 | -0.64949 |
| C | 8.59894  | -0.0769  | -0.1291  | H                                                          | 11.15988 | 2.37707  | -2.94287 | C | -5.95602  | -1.32915 | -0.13947 |
| C | 7.78412  | 1.05335  | 0.08583  | H                                                          | 10.64651 | 0.69931  | -2.64105 | H | -5.32477  | -2.20616 | -0.21846 |
| H | 8.21589  | 2.02011  | 0.32173  | C                                                          | 5.86902  | 3.40084  | 0.26102  | C | -7.19184  | -1.39599 | 0.45219  |
| C | 6.41774  | 0.91682  | -0.03796 | C                                                          | 5.74197  | 3.97022  | 1.54837  | C | -7.9393   | -2.5023  | 1.05817  |
| C | 5.46446  | 1.9898   | 0.03288  | C                                                          | 6.15567  | 5.28838  | 1.7538   | C | -7.66539  | -3.85352 | 1.24012  |
| C | 4.20721  | 1.43662  | -0.12916 | H                                                          | 6.05866  | 5.72203  | 2.7445   | H | -6.72804  | -4.28344 | 0.90476  |
| C | 2.96485  | 2.16318  | -0.18603 | C                                                          | 6.6895   | 6.06035  | 0.71427  | C | -8.61926  | -4.66156 | 1.86844  |
| C | 2.91779  | 3.53879  | -0.46217 | C                                                          | 6.80753  | 5.4832   | -0.55244 | H | -8.39226  | -5.71236 | 2.0072   |
| H | 3.83493  | 4.06776  | -0.66709 | H                                                          | 7.2145   | 6.06983  | -1.37021 | C | -9.85919  | -4.16099 | 2.32457  |
| C | 1.69737  | 4.20611  | -0.50956 | C                                                          | 6.41337  | 4.16117  | -0.79515 | C | -10.13501 | -2.79977 | 2.13764  |
| H | 1.66195  | 5.24779  | -0.80549 | C                                                          | 5.15352  | 3.16108  | 2.69031  | H | -11.07167 | -2.36808 | 2.46519  |
| C | 0.53012  | 3.53957  | -0.16829 | H                                                          | 5.67907  | 2.20676  | 2.80264  | C | -9.18905  | -1.97729 | 1.5166   |
| H | -0.41905 | 4.0548   | -0.20472 | H                                                          | 5.22535  | 3.71596  | 3.63057  | C | -9.23526  | -0.55312 | 1.21443  |
| C | 12.84184 | -4.39527 | -1.25399 | H                                                          | 4.09851  | 2.93643  | 2.49718  | C | -8.0365   | -0.20829 | 0.57799  |
| C | 14.08992 | -3.51464 | -1.01156 | C                                                          | 7.14038  | 7.48797  | 0.97062  | C | -7.57156  | 1.05707  | 0.12289  |
| H | 14.11125 | -3.13004 | 0.01423  | H                                                          | 8.02879  | 7.50326  | 1.61436  | H | -8.1768   | 1.94739  | 0.25759  |
| H | 14.99044 | -4.11919 | -1.16752 | H                                                          | 7.39215  | 7.99279  | 0.03293  | C | -6.33084  | 1.11622  | -0.46724 |
| H | 14.12115 | -2.66925 | -1.70793 | H                                                          | 6.35327  | 8.06381  | 1.47097  | C | -5.57387  | 2.27532  | -0.93371 |
| C | 12.9047  | -4.93372 | -2.709   | C                                                          | 6.564    | 3.56563  | -2.18553 | C | -4.33662  | 1.8153   | -1.35888 |
| H | 12.8758  | -4.10286 | -3.42204 | H                                                          | 5.6865   | 2.96954  | -2.45562 | C | -3.16101  | 2.53223  | -1.81089 |
| H | 13.83505 | -5.49476 | -2.8584  | H                                                          | 6.70017  | 4.35626  | -2.92974 | C | -3.19333  | 3.86839  | -2.22616 |
| H | 12.06293 | -5.60067 | -2.92086 | H                                                          | 7.43521  | 2.90061  | -2.22804 | H | -4.13412  | 4.40075  | -2.22212 |
| C | 12.88692 | -5.58431 | -0.25653 |                                                            |          |          |          | C | -2.03039  | 4.47756  | -2.69774 |
| H | 12.03945 | -6.2603  | -0.4092  | (M, P, P, P)-2                                             |          |          |          | H | -2.07862  | 5.47409  | -3.12082 |
| H | 13.81337 | -6.15374 | -0.39791 | Sum of electronic and thermal Free Energies = -4166.016681 |          |          |          | C | -0.81059  | 3.81675  | -2.63526 |
| H | 12.85403 | -5.21542 | 0.77424  | a.u.                                                       |          |          |          | H | 0.06739   | 4.28689  | -3.05038 |
| C | 11.00679 | 0.81914  | 0.12052  | C                                                          | -0.70994 | 2.5138   | -2.09316 | C | -10.85364 | -5.11915 | 3.01026  |
| C | 11.65959 | 0.86369  | 1.37316  | C                                                          | -1.92158 | 1.81954  | -1.82047 | C | -12.16632 | -4.40662 | 3.4118   |
| C | 12.61648 | 1.85438  | 1.60584  | C                                                          | -1.90876 | 0.37399  | -1.7609  | H | -11.97635 | -3.59703 | 4.12516  |
| H | 13.11384 | 1.89003  | 2.57036  | C                                                          | -0.65998 | -0.32281 | -1.89198 | H | -12.8362  | -5.13106 | 3.88817  |
| C | 12.94504 | 2.7996   | 0.62659  | C                                                          | -0.65443 | -1.72386 | -2.02935 | H | -12.67677 | -3.99367 | 2.53461  |
| C | 12.29396 | 2.73696  | -0.60792 | C                                                          | -1.88701 | -2.36894 | -2.43282 | C | -11.20993 | -6.27796 | 2.04039  |
| H | 12.54543 | 3.45679  | -1.38046 | C                                                          | -1.90501 | -3.57782 | -3.18289 | H | -11.66993 | -5.88135 | 1.12894  |
| C | 11.32664 | 1.76163  | -0.87842 | H                                                          | -0.96549 | -4.01632 | -3.48697 | H | -11.91756 | -6.96265 | 2.52302  |
| C | 11.30376 | -0.13574 | 2.46077  | C                                                          | -3.08864 | -4.14881 | -3.60199 | H | -10.31856 | -6.84738 | 1.75853  |
| H | 10.24929 | -0.03819 | 2.74366  | H                                                          | -3.07044 | -5.05592 | -4.19464 | C | -10.20211 | -5.69686 | 4.29593  |

|   |           |          |          |   |          |          |          |   |          |          |          |
|---|-----------|----------|----------|---|----------|----------|----------|---|----------|----------|----------|
| H | -9.28109  | -6.23992 | 4.06136  | C | 1.8122   | -1.75292 | -1.67607 | C | 12.33104 | 4.22053  | 3.33108  |
| H | -10.89623 | -6.38855 | 4.78837  | C | 1.83273  | -0.30137 | -1.71303 | H | 12.81729 | 3.82487  | 2.43247  |
| H | -9.95759  | -4.88783 | 4.99275  | C | 0.58951  | 0.41689  | -1.82401 | H | 13.02148 | 4.9217   | 3.81275  |
| C | -10.36644 | 0.34979  | 1.53172  | C | 0.56777  | 1.83137  | -1.87297 | H | 12.14364 | 3.39421  | 4.02578  |
| C | -10.4927  | 0.89079  | 2.82974  | C | 1.81082  | 2.55623  | -1.77647 | C | 10.41059 | 5.51922  | 4.2928   |
| C | -11.57512 | 1.72811  | 3.11431  | C | 1.89424  | 3.97241  | -1.5986  | H | 10.16788 | 4.69772  | 4.97547  |
| H | -11.6701  | 2.14531  | 4.11213  | H | 1.01012  | 4.51224  | -1.29502 | H | 11.12905 | 6.18586  | 4.78482  |
| C | -12.53505 | 2.03809  | 2.14426  | C | 3.07921  | 4.65065  | -1.77494 | H | 9.49481  | 6.08514  | 4.09456  |
| C | -12.39768 | 1.48754  | 0.8666   | H | 3.11625  | 5.72441  | -1.633   | C | 11.37112 | 6.13827  | 2.02666  |
| H | -13.13987 | 1.7112   | 0.10672  | C | 4.24136  | 3.94456  | -2.16017 | H | 10.48049 | 6.72324  | 1.77594  |
| C | -11.32644 | 0.64793  | 0.54244  | H | 5.14632  | 4.48052  | -2.42123 | H | 12.09677 | 6.80429  | 2.50875  |
| C | -9.45513  | 0.57931  | 3.89477  | C | 4.22639  | 2.56734  | -2.15739 | H | 11.80725 | 5.75608  | 1.09747  |
| H | -9.37184  | -0.50106 | 4.05542  | H | 5.12196  | 2.01206  | -2.39791 | C | 10.44017 | -0.4449  | 1.31477  |
| H | -9.7231   | 1.05525  | 4.84271  | C | 3.04669  | 1.83865  | -1.83844 | C | 11.36549 | -0.72681 | 0.28599  |
| H | -8.46702  | 0.94217  | 3.5894   | C | 3.06121  | 0.41208  | -1.62237 | C | 12.43155 | -1.59085 | 0.55032  |
| C | -13.68754 | 2.97224  | 2.47054  | C | 4.24892  | -0.30259 | -1.23456 | H | 13.14636 | -1.80195 | -0.23918 |
| H | -14.07352 | 2.78258  | 3.47795  | C | 5.50005  | 0.10763  | -0.69023 | C | 12.5997  | -2.18333 | 1.80734  |
| H | -14.50793 | 2.8463   | 1.75711  | C | 5.99098  | 1.32987  | -0.14398 | C | 11.67624 | -1.88964 | 2.81463  |
| H | -13.35881 | 4.01863  | 2.42731  | H | 5.37239  | 2.21605  | -0.14992 | H | 11.79486 | -2.33943 | 3.79535  |
| C | -11.20704 | 0.05525  | -0.85171 | C | 7.24912  | 1.36266  | 0.40283  | C | 10.59764 | -1.02711 | 2.58963  |
| H | -10.31688 | 0.4379   | -1.36367 | C | 8.02316  | 2.44     | 1.02645  | C | 11.21139 | -0.08846 | -1.08437 |
| H | -12.0871  | 0.30633  | -1.45127 | C | 7.76451  | 3.78457  | 1.27102  | H | 11.13775 | 1.0013   | -0.99859 |
| H | -11.11394 | -1.03529 | -0.80326 | H | 6.8187   | 4.23137  | 0.98482  | H | 12.06771 | -0.33391 | -1.71955 |
| C | -6.08399  | 3.66766  | -0.8668  | C | 8.7442   | 4.56158  | 1.89846  | H | 10.29927 | -0.44089 | -1.57887 |
| C | -5.7848   | 4.47714  | 0.24944  | H | 8.52937  | 5.60712  | 2.0876   | C | 13.75221 | -3.14016 | 2.05935  |
| C | -6.28988  | 5.78091  | 0.30026  | C | 9.99594  | 4.03662  | 2.29257  | H | 14.68432 | -2.75253 | 1.63357  |
| H | -6.05796  | 6.40249  | 1.15953  | C | 10.25684 | 2.68325  | 2.04198  | H | 13.90262 | -3.29803 | 3.13176  |
| C | -7.08306  | 6.29912  | -0.72842 | H | 11.20139 | 2.23416  | 2.31952  | H | 13.55131 | -4.11539 | 1.5977   |
| C | -7.36757  | 5.48429  | -1.82998 | C | 9.2852   | 1.89064  | 1.42054  | C | 9.59756  | -0.73766 | 3.69613  |
| H | -7.9776   | 5.87402  | -2.63919 | C | 9.3117   | 0.48083  | 1.06149  | H | 8.59733  | -1.08584 | 3.4135   |
| C | -6.8835   | 4.17491  | -1.91377 | C | 8.08811  | 0.16982  | 0.4509   | H | 9.89236  | -1.24119 | 4.62158  |
| C | -4.91035  | 3.94364  | 1.37001  | C | 7.58503  | -1.07139 | -0.02025 | H | 9.52734  | 0.33831  | 3.88868  |
| H | -5.31261  | 3.00462  | 1.76494  | H | 8.17564  | -1.97727 | 0.06657  | C | 6.02812  | -3.6392  | -0.8641  |
| H | -4.84534  | 4.66957  | 2.18612  | C | 6.3153   | -1.09679 | -0.55278 | C | 6.62494  | -4.23433 | -1.99571 |
| H | -3.89817  | 3.74008  | 1.00235  | C | 5.51527  | -2.24747 | -0.94365 | C | 7.11888  | -5.53962 | -1.89948 |
| C | -7.64937  | 7.70603  | -0.64156 | C | 4.25717  | -1.77474 | -1.29715 | H | 7.57361  | -5.99719 | -2.77268 |
| H | -7.69217  | 8.17372  | -1.63094 | C | 3.02279  | -2.49867 | -1.52407 | C | 7.038    | -6.26549 | -0.70641 |
| H | -7.03727  | 8.3357   | 0.01196  | C | 2.97661  | -3.899   | -1.47009 | C | 6.44425  | -5.66031 | 0.4064   |
| H | -8.6685   | 7.68594  | -0.23404 | H | 3.90032  | -4.44741 | -1.36343 | H | 6.36979  | -6.2129  | 1.33794  |
| C | -7.19325  | 3.31324  | -3.12626 | C | 1.755    | -4.56708 | -1.46754 | C | 5.94019  | -4.3568  | 0.34815  |
| H | -6.27009  | 3.02165  | -3.64056 | H | 1.72925  | -5.6419  | -1.33182 | C | 6.71338  | -3.46952 | -3.3049  |
| H | -7.82915  | 3.85657  | -3.83161 | C | 0.57227  | -3.8593  | -1.60846 | H | 7.25907  | -2.52917 | -3.16923 |
| H | -7.70598  | 2.39196  | -2.82871 | H | -0.37204 | -4.37742 | -1.53744 | H | 7.22679  | -4.06612 | -4.06493 |
| C | 0.57842   | -2.45912 | -1.80451 | C | 11.02081 | 4.96241  | 2.97808  | H | 5.71293  | -3.21762 | -3.67461 |



|                                                            |          |          |          |                                                           |          |          |          |                                                           |          |          |          |
|------------------------------------------------------------|----------|----------|----------|-----------------------------------------------------------|----------|----------|----------|-----------------------------------------------------------|----------|----------|----------|
| C                                                          | 7.6095   | -7.66986 | -0.61289 | Sum of electronic and thermal Free Energies = -692.961736 | C        | 0.       | 1.81343  | 0.                                                        |          |          |          |
| H                                                          | 7.06991  | -8.26419 | 0.13165  | a.u                                                       | C        | 0.       | 0.39497  | 0.                                                        |          |          |          |
| H                                                          | 7.54694  | -8.18428 | -1.57745 | C                                                         | 3.97833  | -1.43352 | 0.00149  | C                                                         | 1.21788  | 2.53871  | 0.18816  |
| H                                                          | 8.66594  | -7.63598 | -0.31619 | C                                                         | 3.79878  | -0.08968 | 0.00214  | C                                                         | 2.40689  | 1.8933   | 0.34078  |
| C                                                          | 5.27104  | -3.7319  | 1.55955  | C                                                         | 2.49948  | 0.48749  | 0.0008   | C                                                         | 2.48377  | 0.47618  | 0.18267  |
| H                                                          | 4.2149   | -3.52547 | 1.3491   | C                                                         | 1.33487  | -0.31362 | -0.00075 | C                                                         | 1.28907  | -0.28026 | -0.05691 |
| H                                                          | 5.32972  | -4.40394 | 2.42101  | C                                                         | 1.58484  | -1.72108 | -0.00203 | C                                                         | 3.74278  | -0.17213 | 0.18922  |
| H                                                          | 5.74675  | -2.78099 | 1.82105  | C                                                         | 2.83594  | -2.25691 | -0.00091 | C                                                         | 3.85812  | -1.51425 | -0.10369 |
|                                                            |          |          |          | C                                                         | 2.41142  | 1.9247   | 0.00069  | C                                                         | 2.70446  | -2.24098 | -0.45487 |
| (M)-[4]Helicene                                            |          |          |          | C                                                         | 1.21819  | 2.51677  | -0.00057 | C                                                         | 1.46032  | -1.6395  | -0.43515 |
| Sum of electronic and thermal Free Energies = - 692.967716 |          |          |          | C                                                         | 0.       | 1.74287  | -0.00094 | H                                                         | -4.83157 | -1.99687 | 0.10445  |
| a.u                                                        |          |          |          | C                                                         | -0.00001 | 0.34753  | -0.00109 | H                                                         | -4.62799 | 0.42293  | -0.40187 |
| C                                                          | -3.76516 | 1.23566  | -0.11066 | C                                                         | -1.21819 | 2.51676  | -0.00088 | H                                                         | -0.60685 | -2.21098 | 0.77461  |
| C                                                          | -3.55816 | -0.06455 | -0.35155 | C                                                         | -2.41145 | 1.92471  | -0.00025 | H                                                         | -2.79125 | -3.27932 | 0.76374  |
| C                                                          | -2.32357 | -0.59721 | -0.26848 | C                                                         | -2.49951 | 0.48752  | 0.00007  | H                                                         | -3.32337 | 2.44866  | -0.52441 |
| C                                                          | -1.22701 | 0.15611  | -0.0134  | C                                                         | -1.33489 | -0.31359 | -0.00079 | H                                                         | -1.16726 | 3.62396  | -0.23177 |
| C                                                          | -1.49626 | 1.43671  | 0.32424  | C                                                         | -3.7988  | -0.08972 | 0.00144  | H                                                         | 1.16726  | 3.62396  | 0.23177  |
| C                                                          | -2.72076 | 1.98228  | 0.26311  | C                                                         | -3.97829 | -1.43353 | 0.00199  | H                                                         | 3.32337  | 2.44866  | 0.52441  |
| C                                                          | -2.21112 | -1.92682 | -0.40842 | C                                                         | -2.8359  | -2.25695 | 0.00044  | H                                                         | 4.62799  | 0.42293  | 0.40187  |
| C                                                          | -1.02346 | -2.50609 | -0.2149  | C                                                         | -1.58485 | -1.72112 | -0.00113 | H                                                         | 4.83157  | -1.99687 | -0.10445 |
| C                                                          | 0.07091  | -1.75695 | -0.00007 | H                                                         | 4.96861  | -1.86982 | 0.0024   | H                                                         | 2.79125  | -3.27932 | -0.76374 |
| C                                                          | 0.01625  | -0.40273 | -0.00002 | H                                                         | 4.6483   | 0.58072  | 0.00356  | H                                                         | 0.60685  | -2.21098 | -0.77461 |
| C                                                          | 1.22209  | -2.41548 | 0.2147   | H                                                         | 0.78059  | -2.4253  | -0.00439 |                                                           |          |          |          |
| C                                                          | 2.35921  | -1.7424  | 0.40827  | H                                                         | 2.95168  | -3.33306 | -0.00197 | (M)-PH1-[7]Helicene                                       |          |          |          |
| C                                                          | 2.36414  | -0.40804 | 0.26844  | H                                                         | 3.32967  | 2.49686  | 0.00145  | Sum of electronic and thermal Free Energies =-2084.787466 |          |          |          |
| C                                                          | 1.21044  | 0.25449  | 0.01342  | H                                                         | 1.12705  | 3.5946   | -0.00074 | a.u.                                                      |          |          |          |
| C                                                          | 3.5518   | 0.22237  | 0.35156  | H                                                         | -1.12703 | 3.59459  | -0.00075 | C                                                         | -0.03593 | 4.47881  | 1.86917  |
| C                                                          | 3.65334  | 1.53505  | 0.11077  | H                                                         | -3.32968 | 2.49689  | 0.00022  | C                                                         | -0.79721 | 3.39704  | 1.46616  |
| C                                                          | 2.55216  | 2.19511  | -0.26295 | H                                                         | -4.64835 | 0.58064  | 0.00203  | C                                                         | -1.88088 | 3.54454  | 0.5657   |
| C                                                          | 1.37561  | 1.55264  | -0.32412 | H                                                         | -4.96857 | -1.86984 | 0.00312  | C                                                         | -2.23053 | 4.87381  | 0.17561  |
| H                                                          | -4.77978 | 1.66515  | -0.15049 | H                                                         | -2.95168 | -3.3331  | 0.00024  | C                                                         | -1.41515 | 5.96225  | 0.5691   |
| H                                                          | -4.4395  | -0.68797 | -0.58253 | H                                                         | -0.78039 | -2.42512 | -0.00336 | C                                                         | -0.32427 | 5.77222  | 1.39171  |
| H                                                          | -0.73479 | 2.11035  | 0.74217  |                                                           |          |          | C        | -3.44156                                                  | 5.08502  | -0.54661 |          |
| H                                                          | -2.88072 | 3.035    | 0.55282  | (P)-[4]Helicene                                           |          |          | C        | -6.95913                                                  | -0.38602 | -0.56039 |          |
| H                                                          | -3.0875  | -2.57006 | -0.59874 | Sum of electronic and thermal Free Energies =-692.967714  |          |          | C        | -7.30742                                                  | 0.93895  | -0.87728 |          |
| H                                                          | -0.97497 | -3.60847 | -0.25036 | a.u                                                       |          |          | C        | -6.34841                                                  | 1.93173  | -0.84028 |          |
| H                                                          | 1.2626   | -3.51819 | 0.25007  | C                                                         | -3.85812 | -1.51425 | 0.10369  | C                                                         | -5.00198 | 1.65704  | -0.49325 |
| H                                                          | 3.28458  | -2.31294 | 0.59854  | C                                                         | -3.74278 | -0.17213 | -0.18922 | C                                                         | -4.64795 | 0.30294  | -0.1909  |
| H                                                          | 4.48051  | -0.32801 | 0.58249  | C                                                         | -2.48377 | 0.47618  | -0.18267 | C                                                         | -5.65643 | -0.69357 | -0.22328 |
| H                                                          | 4.63005  | 2.04491  | 0.15064  | C                                                         | -1.28907 | -0.28026 | 0.05691  | C                                                         | -4.01002 | 2.71242  | -0.37225 |
| H                                                          | 2.62677  | 3.25732  | -0.55257 | C                                                         | -1.46032 | -1.6395  | 0.43515  | C                                                         | -2.70942 | 2.42701  | 0.13082  |
| H                                                          | 0.56233  | 2.16276  | -0.74199 | C                                                         | -2.70446 | -2.24098 | 0.45487  | C                                                         | -2.31248 | 1.05005  | 0.18398  |
|                                                            |          |          |          | C                                                         | -2.40689 | 1.8933   | -0.34078 | C                                                         | -3.26553 | 0.01667  | 0.07682  |
| TS-[4]Helicene                                             |          |          |          | C                                                         | -1.21788 | 2.53871  | -0.18816 | C                                                         | -4.31652 | 4.05808  | -0.74887 |

|   |          |          |          |                                                            |          |          |          |   |          |          |          |
|---|----------|----------|----------|------------------------------------------------------------|----------|----------|----------|---|----------|----------|----------|
| C | -1.22756 | -1.03912 | 0.26171  | H                                                          | -5.39818 | -1.71511 | 0.02263  | C | -2.2668  | 3.58974  | -0.40611 |
| C | -0.98581 | 0.4029   | 0.22428  | H                                                          | -5.25754 | 4.27013  | -1.24214 | C | -3.02466 | 4.72282  | -0.86162 |
| C | 0.29501  | 0.86528  | 0.07097  | H                                                          | 0.52033  | 1.92033  | -0.03884 | C | -2.37014 | 5.9122   | -1.26911 |
| C | 1.37803  | -0.07312 | 0.04855  | H                                                          | -0.36576 | -3.04184 | 0.33858  | C | -0.99965 | 6.03934  | -1.19963 |
| C | 1.12931  | -1.50642 | 0.17748  | H                                                          | 2.11551  | -4.29194 | 0.32214  | C | -4.44497 | 4.66628  | -0.87322 |
| C | -0.14639 | -1.97864 | 0.27539  | H                                                          | 4.49791  | -4.83773 | 0.1865   | C | -6.71157 | -0.99599 | 1.18171  |
| C | 2.4357   | -2.16419 | 0.13707  | H                                                          | 5.49595  | -0.66232 | -0.21827 | C | -7.29144 | 0.28822  | 1.19225  |
| C | -2.58898 | -1.27673 | 0.18029  | H                                                          | 8.05468  | -4.82351 | -0.08209 | C | -6.5402  | 1.38921  | 0.83456  |
| C | 2.7428   | 0.1532   | -0.07043 | H                                                          | 6.4973   | -5.20193 | -0.82779 | C | -5.1781  | 1.26115  | 0.45461  |
| C | 2.83994  | -3.48909 | 0.20755  | H                                                          | 6.63085  | -5.06234 | 0.93771  | C | -4.58619 | -0.03087 | 0.48558  |
| C | 4.20722  | -3.79493 | 0.1282   | H                                                          | 8.51995  | -2.64334 | 0.98738  | C | -5.38477 | -1.15163 | 0.84032  |
| C | 5.19241  | -2.80435 | -0.02362 | H                                                          | 7.32112  | -1.34164 | 1.00812  | C | -4.38051 | 2.3936   | 0.02281  |
| C | 4.77101  | -1.46249 | -0.09625 | H                                                          | 7.07928  | -2.77677 | 2.01574  | C | -2.94689 | 2.33048  | -0.05304 |
| C | 3.41728  | -1.14411 | -0.01422 | H                                                          | 6.74543  | -3.11671 | -2.30522 | C | -2.33444 | 1.01218  | 0.10773  |
| C | 6.69491  | -3.13237 | -0.11324 | H                                                          | 8.32496  | -2.84499 | -1.54214 | C | -3.18729 | -0.12604 | 0.20324  |
| C | 6.9757   | -4.64393 | -0.01481 | H                                                          | 7.12319  | -1.54628 | -1.58206 | C | -5.08358 | 3.56299  | -0.40572 |
| C | 7.44553  | -2.42904 | 1.04293  | H                                                          | 5.15782  | 3.78373  | 1.55237  | C | -1.1013  | -1.02485 | -0.15136 |
| C | 7.25248  | -2.62741 | -1.46571 | H                                                          | 4.20034  | 3.75965  | -2.6249  | C | -0.93424 | 0.43904  | 0.00675  |
| C | 3.4264   | 1.46087  | -0.23613 | H                                                          | -4.37126 | -5.02769 | 2.28382  | C | 0.34999  | 0.87874  | 0.20363  |
| C | -3.18069 | -2.64336 | 0.16429  | H                                                          | -4.00754 | -5.15067 | -1.98529 | C | 1.45976  | -0.01485 | 0.05504  |
| C | 4.03767  | 2.08327  | 0.874    | H                                                          | -2.34671 | -2.29112 | 2.89949  | C | 1.26542  | -1.43466 | -0.23376 |
| C | 4.68963  | 3.30726  | 0.69295  | H                                                          | -3.7597  | -3.15901 | 3.52513  | C | 0.00121  | -1.92751 | -0.31462 |
| C | 4.75629  | 3.93268  | -0.55444 | H                                                          | -3.95206 | -1.59834 | 2.70808  | C | 2.60585  | -2.02987 | -0.32997 |
| C | 4.15128  | 3.2954   | -1.64159 | H                                                          | -3.172   | -3.36033 | -3.20945 | C | -2.42814 | -1.35674 | 0.0065   |
| C | 3.48621  | 2.07335  | -1.50786 | H                                                          | -1.9035  | -2.42312 | -2.40058 | C | 2.81452  | 0.26872  | 0.14017  |
| C | -3.54981 | -3.26389 | 1.3777   | H                                                          | -3.52858 | -1.7607  | -2.53621 | C | 3.06246  | -3.31259 | -0.58796 |
| C | -4.08102 | -4.5573  | 1.34613  | H                                                          | 2.94935  | 1.3068   | 2.58181  | C | 4.44625  | -3.55416 | -0.61905 |
| C | -4.25051 | -5.25836 | 0.14901  | H                                                          | 4.49057  | 2.0832   | 2.98616  | C | 5.38854  | -2.53467 | -0.40361 |
| C | -3.87757 | -4.6259  | -1.04054 | H                                                          | 4.46018  | 0.46668  | 2.26142  | C | 4.91822  | -1.23035 | -0.14757 |
| C | -3.34309 | -3.33393 | -1.05676 | H                                                          | 3.10869  | 1.97424  | -3.63129 | C | 3.55112  | -0.98042 | -0.10321 |
| C | -3.39446 | -2.54261 | 2.69787  | H                                                          | 1.76568  | 1.38464  | -2.64144 | C | 6.90839  | -2.79365 | -0.44021 |
| C | -2.9667  | -2.68779 | -2.37083 | H                                                          | 3.20129  | 0.38813  | -2.84464 | C | 7.24747  | -4.27549 | -0.72458 |
| C | 3.98355  | 1.45376  | 2.2483   | H                                                          | 6.16387  | 5.45256  | 0.0803   | C | 7.54968  | -1.92662 | -1.55746 |
| C | 2.8585   | 1.42182  | -2.72034 | H                                                          | 4.7164   | 6.09319  | -0.70478 | C | 7.52554  | -2.41152 | 0.9327   |
| C | 5.44184  | 5.26875  | -0.72217 | H                                                          | 5.97461  | 5.32953  | -1.67775 | C | 3.4221   | 1.59356  | 0.40586  |
| C | -4.79726 | -6.66715 | 0.14213  | H                                                          | -5.45601 | -6.84622 | 0.99859  | C | -2.92889 | -2.75617 | -0.05074 |
| H | 0.78261  | 4.32859  | 2.5678   | H                                                          | -3.98861 | -7.40876 | 0.19377  | C | 3.97644  | 1.87118  | 1.67397  |
| H | -0.58403 | 2.41879  | 1.87756  | H                                                          | -5.3656  | -6.87252 | -0.77154 | C | 4.54295  | 3.12864  | 1.91068  |
| H | -1.687   | 6.96098  | 0.23505  |                                                            |          |          |          | C | 4.57504  | 4.11458  | 0.92078  |
| H | 0.28726  | 6.61661  | 1.69795  | TS-PH1-[7]Helicene                                         |          |          |          | C | 4.02552  | 3.8218   | -0.3332  |
| H | -3.68853 | 6.09124  | -0.87616 | Sum of electronic and thermal Free Energies = -2084.767230 |          |          |          | C | 3.4479   | 2.57828  | -0.60843 |
| H | -7.71333 | -1.16822 | -0.57569 | a.u.                                                       |          |          |          | C | -3.49354 | -3.25013 | -1.24416 |
| H | -8.33267 | 1.18763  | -1.1379  | C                                                          | -0.24718 | 4.96757  | -0.68804 | C | -3.94399 | -4.5744  | -1.28654 |
| H | -6.65465 | 2.94884  | -1.05471 | C                                                          | -0.87337 | 3.79492  | -0.3081  | C | -3.84699 | -5.41644 | -0.17488 |

|   |          |          |          |   |                                                            |          |          |   |          |          |          |
|---|----------|----------|----------|---|------------------------------------------------------------|----------|----------|---|----------|----------|----------|
| C | -3.28346 | -4.90929 | 1.00224  | H | -2.78823                                                   | -2.17387 | 2.71592  | C | -4.77601 | -1.48557 | -0.09741 |
| C | -2.81837 | -3.59321 | 1.08166  | H | -2.28336                                                   | -3.81972 | 3.16319  | C | -3.42564 | -1.16471 | -0.01463 |
| H | 0.82745  | 5.05461  | -0.57384 | C | -3.62517                                                   | -2.35081 | -2.46022 | C | -6.68821 | -3.16703 | -0.1137  |
| H | -0.27558 | 3.0292   | 0.12278  | H | -4.28865                                                   | -1.50565 | -2.2434  | C | -6.96123 | -4.68611 | -0.01628 |
| H | -2.98317 | 6.73418  | -1.62357 | H | -2.65125                                                   | -1.94022 | -2.74794 | C | -7.43801 | -2.46408 | 1.05044  |
| H | -0.51228 | 6.95635  | -1.50865 | H | -4.03655                                                   | -2.90747 | -3.30748 | C | -7.24513 | -2.65989 | -1.47176 |
| H | -5.00256 | 5.51961  | -1.24292 | C | -4.32402                                                   | -6.85706 | -0.24167 | C | -3.4457  | 1.44001  | -0.2235  |
| H | -7.30285 | -1.85999 | 1.4614   | H | -4.96303                                                   | -7.01729 | -1.11547 | C | 3.2041   | -2.61937 | 0.17462  |
| H | -8.32462 | 0.41373  | 1.49463  | H | -3.47091                                                   | -7.5437  | -0.31464 | C | -4.01595 | 2.07025  | 0.90208  |
| H | -6.99378 | 2.36952  | 0.88665  | H | -4.89352                                                   | -7.1235  | 0.65565  | C | -4.6874  | 3.28599  | 0.73396  |
| H | -4.93163 | -2.12998 | 0.85331  |   |                                                            |          |          | C | -4.80635 | 3.88717  | -0.52266 |
| H | -6.16349 | 3.53646  | -0.42082 |   | (P)-PH1-[7]Helicene                                        |          |          | C | -4.24043 | 3.24419  | -1.6293  |
| H | 0.6221   | 1.87228  | 0.51123  |   | Sum of electronic and thermal Free Energies = -2084.787466 |          |          | C | -3.56132 | 2.02916  | -1.501   |
| H | -0.21083 | -2.97839 | -0.4787  |   | a.u.                                                       |          |          | C | 3.6294   | -3.20551 | 1.38415  |
| H | 2.36912  | -4.12693 | -0.76733 | C | -0.01447                                                   | 4.47621  | 1.81489  | C | 4.20455  | -4.48128 | 1.3577   |
| H | 4.78541  | -4.56119 | -0.8197  | C | 0.76279                                                    | 3.39877  | 1.43194  | C | 4.36155  | -5.18706 | 0.16117  |
| H | 5.6121   | -0.41312 | 0.01264  | C | 1.85413                                                    | 3.5554   | 0.54051  | C | 3.93238  | -4.58985 | -1.03031 |
| H | 8.33642  | -4.39625 | -0.73544 | C | 2.20267                                                    | 4.88524  | 0.14848  | C | 3.35492  | -3.31699 | -1.04356 |
| H | 6.8391   | -4.93199 | 0.05184  | C | 1.37315                                                    | 5.96976  | 0.52811  | C | 3.48301  | -2.45185 | 2.69469  |
| H | 6.8594   | -4.59159 | -1.69927 | C | 0.27119                                                    | 5.77051  | 1.33376  | C | 2.92057  | -2.67794 | -2.35082 |
| H | 8.6327   | -2.09724 | -1.58532 | C | 3.42843                                                    | 5.10223  | -0.55172 | C | -3.89099 | 1.44146  | 2.2796   |
| H | 7.37275  | -0.86107 | -1.3806  | C | 6.93483                                                    | -0.38631 | -0.5966  | C | -2.96755 | 1.34544  | -2.72113 |
| H | 7.12614  | -2.19103 | -2.53232 | C | 7.28998                                                    | 0.94119  | -0.90538 | C | -5.51434 | 5.22124  | -0.68496 |
| H | 7.08593  | -3.02229 | 1.72867  | C | 6.34075                                                    | 1.94295  | -0.85713 | C | 4.97069  | -6.57864 | 0.14811  |
| H | 8.6087   | -2.58219 | 0.91513  | C | 4.9938                                                     | 1.67397  | -0.50198 | H | -0.83951 | 4.32688  | 2.50141  |
| H | 7.34661  | -1.35714 | 1.16563  | C | 4.63684                                                    | 0.31906  | -0.20029 | H | 0.55963  | 2.42027  | 1.84213  |
| H | 4.96338  | 3.34074  | 2.88857  | C | 5.63402                                                    | -0.68941 | -0.25131 | H | 1.6409   | 6.96735  | 0.19621  |
| H | 4.06005  | 4.57102  | -1.11872 | C | 4.0019                                                     | 2.73078  | -0.37276 | H | -0.35285 | 6.60679  | 1.62613  |
| H | -4.38115 | -4.95235 | -2.20539 | C | 2.69675                                                    | 2.44058  | 0.12222  | H | 3.6722   | 6.1082   | -0.87566 |
| H | -3.2077  | -5.54846 | 1.87663  | C | 2.30198                                                    | 1.06541  | 0.18736  | H | 7.68348  | -1.16918 | -0.62835 |
| C | 3.92788  | 0.83187  | 2.78139  | C | 3.26058                                                    | 0.03451  | 0.08067  | H | 8.31318  | 1.18003  | -1.17136 |
| H | 2.88968  | 0.58344  | 3.03051  | C | 4.31077                                                    | 4.07998  | -0.74118 | H | 6.64745  | 2.95685  | -1.07419 |
| H | 4.42095  | -0.09588 | 2.47247  | C | 1.22547                                                    | -1.03982 | 0.27536  | H | 5.35238  | -1.70505 | -0.01755 |
| H | 4.42121  | 1.20847  | 3.68225  | C | 0.96985                                                    | 0.41047  | 0.23592  | H | 5.26016  | 4.29135  | -1.21293 |
| C | 2.86827  | 2.29743  | -1.98593 | C | -0.30885                                                   | 0.86948  | 0.07679  | H | -0.53615 | 1.92197  | -0.03033 |
| H | 3.15749  | 1.30204  | -2.33665 | C | -1.38659                                                   | -0.0761  | 0.05657  | H | 0.3769   | -3.04473 | 0.3474   |
| H | 1.7725   | 2.3356   | -1.96545 | C | -1.12601                                                   | -1.51832 | 0.18576  | H | -2.10438 | -4.30583 | 0.32662  |
| H | 3.22154  | 3.04211  | -2.70562 | C | 0.14883                                                    | -1.98619 | 0.28508  | H | -4.49233 | -4.86195 | 0.1861   |
| C | 5.18546  | 5.47865  | 1.19282  | C | -2.43617                                                   | -2.18426 | 0.1396   | H | -5.50295 | -0.69099 | -0.21959 |
| H | 5.92175  | 5.73761  | 0.42318  | C | 2.58795                                                    | -1.26657 | 0.18863  | H | -8.04076 | -4.86074 | -0.08493 |
| H | 4.41176  | 6.25653  | 1.19335  | C | -2.75157                                                   | 0.13955  | -0.06586 | H | -6.47518 | -5.22945 | -0.83431 |
| H | 5.6851   | 5.49635  | 2.16604  | C | -2.8321                                                    | -3.51024 | 0.21005  | H | -6.61064 | -5.09158 | 0.93947  |
| C | -2.23515 | -3.05844 | 2.37892  | C | -4.20025                                                   | -3.82222 | 0.12857  | H | -8.51074 | -2.68305 | 0.98894  |
| H | -1.18987 | -2.7601  | 2.2442   | C | -5.18551                                                   | -2.83266 | -0.02423 | H | -7.30441 | -1.37851 | 1.00701  |

|                                                            |          |          |          |   |          |          |          |                    |          |          |          |
|------------------------------------------------------------|----------|----------|----------|---|----------|----------|----------|--------------------|----------|----------|----------|
| H                                                          | -7.06014 | -2.82165 | 2.01443  | C | -6.68961 | 1.66963  | 0.41802  | H                  | -4.78676 | 2.45351  | -0.1652  |
| H                                                          | -6.72826 | -3.15421 | -2.3014  | C | -7.40949 | 0.52706  | 0.77969  | H                  | -7.18198 | 2.63696  | 0.36627  |
| H                                                          | -8.31674 | -2.88194 | -1.5413  | C | -6.77107 | -0.70503 | 0.82265  | H                  | -8.46885 | 0.59389  | 1.01207  |
| H                                                          | -7.10957 | -1.57858 | -1.57469 | C | -5.46523 | -3.33584 | 0.86741  | H                  | -7.36478 | -1.57839 | 1.06594  |
| H                                                          | -5.12652 | 3.76995  | 1.60085  | C | -4.96101 | -4.59439 | 0.6753   | H                  | -6.41811 | -3.23358 | 1.37274  |
| H                                                          | -4.33259 | 3.69441  | -2.61288 | C | -0.10229 | -1.83803 | 0.05002  | H                  | -5.50908 | -5.46441 | 1.02863  |
| H                                                          | 4.5373   | -4.92868 | 2.28899  | C | 1.16848  | -1.3199  | 0.06636  | H                  | -0.25822 | -2.90371 | 0.17611  |
| H                                                          | 4.05371  | -5.12286 | -1.96843 | C | 1.40028  | 0.10925  | -0.05882 | H                  | 0.45995  | 2.07844  | -0.21423 |
| H                                                          | 2.43098  | -2.22243 | 2.89665  | C | 0.29781  | 1.00425  | -0.16251 | H                  | 2.19497  | -4.07675 | 0.39143  |
| H                                                          | 3.8778   | -3.0446  | 3.52524  | C | -0.97238 | 0.47585  | -0.16656 | H                  | 4.58539  | -4.56174 | 0.55693  |
| H                                                          | 4.02505  | -1.49974 | 2.65685  | C | -2.24932 | 1.16894  | -0.13599 | H                  | 5.53636  | -0.37297 | 0.1937   |
| H                                                          | 3.10136  | -3.35749 | -3.18902 | C | 2.48204  | -1.94405 | 0.19665  | H                  | 8.14487  | -4.47221 | 0.73312  |
| H                                                          | 1.85529  | -2.42473 | -2.32685 | C | 2.9083   | -3.25728 | 0.34594  | H                  | 6.7004   | -4.90258 | -0.19053 |
| H                                                          | 3.47646  | -1.74979 | -2.52832 | C | 4.28062  | -3.52781 | 0.43997  | H                  | 6.60966  | -4.72047 | 1.57366  |
| H                                                          | -2.83878 | 1.36874  | 2.57819  | C | 5.25885  | -2.5165  | 0.38884  | H                  | 8.4347   | -2.26292 | 1.7951   |
| H                                                          | -4.42448 | 2.03909  | 3.02478  | C | 4.82073  | -1.18988 | 0.23727  | H                  | 7.22094  | -0.98484 | 1.63436  |
| H                                                          | -4.30256 | 0.42627  | 2.28419  | C | 3.45746  | -0.9028  | 0.14088  | H                  | 6.8807   | -2.39946 | 2.64189  |
| H                                                          | -3.22965 | 1.89234  | -3.63166 | C | 2.77246  | 0.37017  | -0.0138  | H                  | 7.08371  | -2.84419 | -1.67769 |
| H                                                          | -1.87543 | 1.29573  | -2.64868 | C | 3.43383  | 1.69692  | -0.09541 | H                  | 8.55442  | -2.52542 | -0.73624 |
| H                                                          | -3.3385  | 0.31822  | -2.80947 | C | -2.34672 | 2.65328  | -0.13193 | H                  | 7.34423  | -1.25164 | -0.95078 |
| H                                                          | -6.1691  | 5.42392  | 0.16837  | C | 6.76734  | -2.81327 | 0.49162  | H                  | 4.41198  | 4.29074  | 1.87929  |
| H                                                          | -4.78447 | 6.03815  | -0.75395 | C | 7.06261  | -4.31585 | 0.66137  | H                  | 4.86875  | 3.8007   | -2.35412 |
| H                                                          | -6.12123 | 5.23518  | -1.59676 | C | 7.35816  | -2.06838 | 1.71253  | H                  | -2.45164 | 5.29692  | -2.27794 |
| H                                                          | 5.44672  | -6.80629 | 1.10678  | C | 7.47688  | -2.32733 | -0.79471 | H                  | -2.44479 | 5.3012   | 2.00787  |
| H                                                          | 4.19921  | -7.3369  | -0.03671 | C | 3.62501  | 2.46385  | 1.07404  | H                  | 2.06777  | 1.86609  | 2.46367  |
| H                                                          | 5.72539  | -6.66847 | -0.64133 | C | 4.26203  | 3.70495  | 0.97429  | H                  | 3.46852  | 2.64008  | 3.22114  |
|                                                            |          |          |          | C | 4.71303  | 4.20936  | -0.24803 | H                  | 3.56904  | 0.96694  | 2.64321  |
| (M)-PH2-[7]Helicene                                        |          |          |          | C | 4.51888  | 3.43022  | -1.39225 | H                  | 4.12837  | 1.89834  | -3.46839 |
| Sum of electronic and thermal Free Energies = -2084.778337 |          |          |          | C | 3.88802  | 2.18394  | -1.34064 | H                  | 2.63382  | 1.20627  | -2.81566 |
| a.u.                                                       |          |          |          | C | -2.37087 | 3.36063  | -1.35407 | H                  | 4.16764  | 0.39263  | -2.53407 |
| C                                                          | -2.24298 | -6.25222 | -1.27059 | C | -2.42603 | 4.75817  | -1.33239 | H                  | 5.84374  | 5.84555  | 0.61187  |
| C                                                          | -1.56468 | -5.11789 | -1.76549 | C | -2.44918 | 5.47861  | -0.13529 | H                  | 4.63883  | 6.34935  | -0.57695 |
| C                                                          | -1.93874 | -3.84798 | -1.37179 | C | -2.42291 | 4.76015  | 1.06348  | H                  | 6.13809  | 5.59108  | -1.11758 |
| C                                                          | -3.01217 | -3.63714 | -0.46782 | C | -2.36868 | 3.36324  | 1.08913  | H                  | -1.46541 | 2.00026  | -2.78223 |
| C                                                          | -3.76053 | -4.78666 | -0.05946 | C | 3.15953  | 1.95936  | 2.42193  | H                  | -2.38183 | 3.32905  | -3.5144  |
| C                                                          | -3.33026 | -6.08237 | -0.44177 | C | 3.69621  | 1.37973  | -2.60707 | H                  | -3.22336 | 1.9576   | -2.771   |
| C                                                          | -3.445   | -2.31685 | -0.0476  | C | 5.37098  | 5.56688  | -0.33584 | H                  | -2.31529 | 3.33794  | 3.24802  |
| C                                                          | -2.61512 | -1.1348  | -0.10298 | C | -2.35923 | 2.6259   | -2.67597 | H                  | -1.49531 | 1.95867  | 2.49312  |
| C                                                          | -3.2364  | 0.19695  | -0.04748 | C | -2.35607 | 2.63225  | 2.41236  | H                  | -3.25418 | 2.01526  | 2.53574  |
| C                                                          | -4.66719 | 0.32821  | 0.17807  | C | -2.47395 | 6.98959  | -0.13605 | H                  | -2.95604 | 7.38249  | -1.03765 |
| C                                                          | -5.40041 | -0.8423  | 0.52379  | H | -1.93042 | -7.24862 | -1.57077 | H                  | -1.45745 | 7.40469  | -0.10412 |
| C                                                          | -4.7591  | -2.16763 | 0.45994  | H | -0.74979 | -5.24123 | -2.47382 | H                  | -3.01075 | 7.38279  | 0.73418  |
| C                                                          | -1.2136  | -0.95783 | -0.11101 | H | -1.42954 | -2.98967 | -1.79196 |                    |          |          |          |
| C                                                          | -5.33834 | 1.5658   | 0.11818  | H | -3.89913 | -6.94123 | -0.0931  | TS-PH2-[7]Helicene |          |          |          |

|                                                            |          |          |          |         |          |          |          |                                                            |          |          |          |
|------------------------------------------------------------|----------|----------|----------|---------|----------|----------|----------|------------------------------------------------------------|----------|----------|----------|
| Sum of electronic and thermal Free Energies = -2084.757787 | C        | 4.06189  | 1.86648  | 1.59266 | H        | -1.46823 | 7.27844  | 1.16064                                                    |          |          |          |
| a.u.                                                       | C        | -2.55634 | 3.22671  | 1.2684  | H        | -2.00852 | 7.43458  | -0.52196                                                   |          |          |          |
| C                                                          | -2.94238 | -6.31689 | 1.22679  | C       | -2.56548 | 4.61998  | 1.37115  | H                                                          | -1.34638 | 3.56854  | -3.15644 |
| C                                                          | -1.91111 | -5.56506 | 0.63214  | C       | -2.20612 | 5.43707  | 0.29235  | H                                                          | -0.39464 | 2.34756  | -2.28595 |
| C                                                          | -2.13921 | -4.26959 | 0.21163  | C       | -1.8272  | 4.83     | -0.90752 | H                                                          | -2.08866 | 2.02576  | -2.66548 |
| C                                                          | -3.38645 | -3.61913 | 0.34678  | C       | -1.79677 | 3.43661  | -1.04636 | H                                                          | 4.43897  | 1.26732  | 3.63462  |
| C                                                          | -4.44856 | -4.43171 | 0.8822   | C       | 3.05531  | 2.15867  | -2.10611 | H                                                          | 2.88036  | 0.70826  | 2.987    |
| C                                                          | -4.19288 | -5.753   | 1.333    | C       | 3.93472  | 0.88246  | 2.74329  | H                                                          | 4.3747   | -0.08598 | 2.48179  |
| C                                                          | -3.64234 | -2.22688 | -0.04622 | C       | 5.4949   | 5.36333  | 0.96774  | H                                                          | 3.36551  | 1.15969  | -2.43026 |
| C                                                          | -2.63523 | -1.15911 | -0.23205 | C       | -2.96558 | 2.36615  | 2.4509   | H                                                          | 1.95914  | 2.17293  | -2.09119 |
| C                                                          | -3.15977 | 0.2471   | -0.26742 | C       | -1.3851  | 2.81051  | -2.36825 | H                                                          | 3.39721  | 2.89093  | -2.84367 |
| C                                                          | -4.53924 | 0.5446   | -0.59583 | C       | -2.2225  | 6.94934  | 0.43519  | H                                                          | 6.34165  | 5.26154  | 1.65478  |
| C                                                          | -5.45559 | -0.52733 | -0.59262 | H       | -2.75823 | -7.32816 | 1.5687   | H                                                          | 5.86202  | 5.78511  | 0.02675  |
| C                                                          | -5.01644 | -1.83842 | -0.09379 | H       | -0.9314  | -6.00693 | 0.49126  | H                                                          | 4.78871  | 6.07989  | 1.40688  |
| C                                                          | -1.20166 | -1.03893 | -0.17383 | H       | -1.35002 | -3.75476 | -0.28279 |                                                            |          |          |          |
| C                                                          | -4.97736 | 1.82702  | -0.98926 | H       | -5.02058 | -6.31712 | 1.74963  | (P)-PH2-[7]Helicene                                        |          |          |          |
| C                                                          | -6.28609 | 2.03341  | -1.40234 | H       | -4.27459 | 2.64609  | -0.98024 | Sum of electronic and thermal Free Energies = -2084.778337 |          |          |          |
| C                                                          | -7.18442 | 0.9595   | -1.44938 | H       | -6.60343 | 3.02284  | -1.71021 | a.u.                                                       |          |          |          |
| C                                                          | -6.77135 | -0.30388 | -1.04781 | H       | -8.19621 | 1.10896  | -1.80755 | C                                                          | -2.15966 | -6.26687 | 1.24827  |
| C                                                          | -6.03777 | -2.68851 | 0.41626  | H       | -7.46441 | -1.13188 | -1.12013 | C                                                          | -1.49056 | -5.12527 | 1.74409  |
| C                                                          | -5.76859 | -3.92083 | 0.93172  | H       | -7.04897 | -2.30877 | 0.45323  | C                                                          | -1.88528 | -3.85837 | 1.3622   |
| C                                                          | -0.05443 | -1.88469 | -0.34474 | H       | -6.55523 | -4.52842 | 1.36508  | C                                                          | -2.96669 | -3.66281 | 0.46189  |
| C                                                          | 1.21634  | -1.38523 | -0.2207  | H       | -0.1368  | -2.91165 | -0.65318 | C                                                          | -3.70783 | -4.81876 | 0.05477  |
| C                                                          | 1.46568  | 0.01697  | 0.07176  | H       | 2.22586  | -4.10783 | -0.81801 | C                                                          | -3.25768 | -6.11132 | 0.431    |
| C                                                          | 0.36159  | 0.90056  | 0.17317  | H       | 4.62051  | -4.60993 | -0.95049 | C                                                          | -3.41894 | -2.34511 | 0.05126  |
| C                                                          | -0.90268 | 0.39182  | 0.00682  | H       | 5.6034   | -0.50516 | -0.08105 | C                                                          | -2.59663 | -1.16046 | 0.11699  |
| C                                                          | -2.13324 | 1.14728  | -0.06708 | H       | 8.17575  | -4.56163 | -0.97525 | C                                                          | -3.23338 | 0.17296  | 0.06052  |
| C                                                          | 2.53206  | -2.0202  | -0.3683  | H       | 6.68427  | -5.06234 | -0.15465 | C                                                          | -4.65839 | 0.29342  | -0.18884 |
| C                                                          | 2.94573  | -3.31383 | -0.65136 | H       | 6.66595  | -4.68839 | -1.89903 | C                                                          | -5.38466 | -0.88241 | -0.53507 |
| C                                                          | 4.31905  | -3.5957  | -0.72631 | H       | 8.52477  | -2.25988 | -1.79413 | C                                                          | -4.73623 | -2.2077  | -0.45528 |
| C                                                          | 5.30281  | -2.60972 | -0.52436 | H       | 7.31703  | -0.98449 | -1.52566 | C                                                          | -1.19583 | -0.96909 | 0.13646  |
| C                                                          | 4.88163  | -1.29874 | -0.2374  | H       | 6.98755  | -2.28071 | -2.6951  | C                                                          | -5.32327 | 1.53614  | -0.15901 |
| C                                                          | 3.52161  | -1.00448 | -0.15485 | H       | 7.04242  | -3.19098 | 1.54969  | C                                                          | -6.67118 | 1.63438  | -0.47516 |
| C                                                          | 2.8417   | 0.25932  | 0.10945  | H       | 8.55596  | -2.79005 | 0.69932  | C                                                          | -7.38861 | 0.48522  | -0.82648 |
| C                                                          | 3.51275  | 1.5613   | 0.32807  | H       | 7.34521  | -1.52637 | 1.00685  | C                                                          | -6.75298 | -0.74956 | -0.84974 |
| C                                                          | -2.17139 | 2.62808  | 0.04772  | H       | 4.36753  | 4.40611  | -1.33152 | C                                                          | -5.43961 | -3.38309 | -0.85065 |
| C                                                          | 6.81158  | -2.9179  | -0.60919 | H       | 5.12352  | 3.32857  | 2.74975  | C                                                          | -4.92208 | -4.63672 | -0.66348 |
| C                                                          | 7.09225  | -4.40465 | -0.93031 | H       | -2.86012 | 5.07668  | 2.31115  | C                                                          | -0.07799 | -1.84269 | -0.0269  |
| C                                                          | 7.44991  | -2.0518  | -1.7289  | H       | -1.5498  | 5.44979  | -1.75443 | C                                                          | 1.18507  | -1.31194 | -0.04083 |
| C                                                          | 7.48044  | -2.58207 | 0.75144  | H       | 0.50989  | 1.96093  | 0.34796  | C                                                          | 1.40678  | 0.12866  | 0.08523  |
| C                                                          | 3.62247  | 2.48368  | -0.73376 | H       | -3.11923 | 2.98505  | 3.34011  | C                                                          | 0.2977   | 1.01651  | 0.18923  |
| C                                                          | 4.27569  | 3.70088  | -0.51142 | H       | -3.89696 | 1.831    | 2.23378  | C                                                          | -0.96423 | 0.47583  | 0.19595  |
| C                                                          | 4.81769  | 4.02362  | 0.73616  | H       | -2.19823 | 1.6164   | 2.67087  | C                                                          | -2.25646 | 1.15282  | 0.15692  |
| C                                                          | 4.70435  | 3.09416  | 1.77609  | H       | -3.2007  | 7.29841  | 0.78621  | C                                                          | 2.5112   | -1.92491 | -0.17927 |

|   |          |          |          |   |          |          |          |   |          |         |          |
|---|----------|----------|----------|---|----------|----------|----------|---|----------|---------|----------|
| C | 2.94683  | -3.23311 | -0.33115 | C | -2.30876 | 2.57908  | -2.39197 | H | 4.37506  | 4.31697 | -1.8935  |
| C | 4.32357  | -3.4899  | -0.43323 | C | -2.65535 | 6.96084  | 0.12687  | H | 4.86576  | 3.8482  | 2.34113  |
| C | 5.28703  | -2.46522 | -0.38778 | H | -1.82992 | -7.25647 | 1.54188  | H | -2.65057 | 5.2727  | 2.28009  |
| C | 4.84238  | -1.13923 | -0.23432 | H | -0.67379 | -5.24449 | 2.44658  | H | -2.48853 | 5.26727 | -2.00558 |
| C | 3.47907  | -0.86909 | -0.12959 | H | -1.39104 | -2.992   | 1.77833  | H | 2.02887  | 1.86984 | -2.42741 |
| C | 2.77579  | 0.39988  | 0.0297   | H | -3.81722 | -6.97462 | 0.08662  | H | 3.42557  | 2.62722 | -3.22329 |
| C | 3.4262   | 1.72959  | 0.10121  | H | -4.75962 | 2.41896  | 0.10649  | H | 3.53341  | 0.96136 | -2.60697 |
| C | -2.38456 | 2.63217  | 0.14753  | H | -7.1639  | 2.59914  | -0.44781 | H | 4.145    | 1.9154  | 3.4655   |
| C | 6.79955  | -2.74734 | -0.49758 | H | -8.4426  | 0.55225  | -1.06964 | H | 2.63319  | 1.24554 | 2.81225  |
| C | 7.10745  | -4.25306 | -0.67136 | H | -7.33976 | -1.62384 | -1.09573 | H | 4.1631   | 0.41651 | 2.50735  |
| C | 7.37495  | -1.99106 | -1.72561 | H | -6.39886 | -3.28487 | -1.33906 | H | 5.73613  | 5.91414 | -0.66451 |
| C | 7.50611  | -2.25386 | 0.79396  | H | -5.46265 | -5.51133 | -1.00873 | H | 4.62271  | 6.36513 | 0.63961  |
| C | 3.60332  | 2.48889  | -1.07371 | H | -0.23296 | -2.90666 | -0.14771 | H | 6.17619  | 5.60477 | 1.02805  |
| C | 4.2344   | 3.73476  | -0.98822 | H | 0.45118  | 2.08939  | 0.23797  | H | -1.58841 | 1.97217 | 2.79371  |
| C | 4.69065  | 4.24114  | 0.23235  | H | 2.24085  | -4.0553  | -0.3729  | H | -2.54053 | 3.28474 | 3.52573  |
| C | 4.51126  | 3.47083  | 1.38688  | H | 4.64435  | -4.516   | -0.55173 | H | -3.35282 | 1.91183 | 2.7389   |
| C | 3.88644  | 2.22131  | 1.34143  | H | 5.54869  | -0.31752 | -0.19659 | H | -2.2642  | 3.27618 | -3.23421 |
| C | -2.4764  | 3.33673  | 1.36561  | H | 8.19201  | -4.38904 | -0.74718 | H | -1.42361 | 1.93457 | -2.42029 |
| C | -2.5744  | 4.73297  | 1.34131  | H | 6.75033  | -4.83311 | 0.18691  | H | -3.18869 | 1.93732 | -2.51591 |
| C | -2.57704 | 5.44381  | 0.13761  | H | 6.64934  | -4.64846 | -1.58481 | H | -3.02423 | 7.34093 | 1.08464  |
| C | -2.48362 | 4.72916  | -1.06249 | H | 8.45248  | -2.17805 | -1.80734 | H | -1.6639  | 7.39671 | -0.05154 |
| C | -2.3853  | 3.33483  | -1.07737 | H | 7.21825  | -0.91177 | -1.63277 | H | -3.32479 | 7.31357 | -0.66538 |
| C | 3.12126  | 1.9578   | -2.41322 | H | 6.88747  | -2.33412 | -2.64456 |   |          |         |          |
| C | 3.69821  | 1.40367  | 2.60792  | H | 7.11164  | -2.784   | 1.6676   |   |          |         |          |
| C | 5.34741  | 5.60856  | 0.31195  | H | 8.58452  | -2.44124 | 0.72517  |   |          |         |          |
| C | -2.48978 | 2.58542  | 2.68574  | H | 7.351    | -1.18037 | 0.94127  |   |          |         |          |

## 8. OFET fabrication and measurement

Heavily doped silicon substrates with a 300 nm SiO<sub>2</sub> dielectric (with a capacitance of 11 nF cm<sup>-2</sup>) were modified by octadecyltrichlorosilane (OTS) through thermal vapor at 150 °C. The sample (**1** or **2**) layer was spin-coated 60s at 2000 rpm from 5 mg/mL CHCl<sub>3</sub> and then annealed at 200 °C for 2 hours under glove box conditions. Source and drain gold electrodes were thermal vapor deposited at a thickness of 50 nm. The channel length and width were 50 μm and 1000 μm, respectively. A Keithley 4200-SCS was used for all standard electrical measurements in glove box under nitrogen atmosphere.

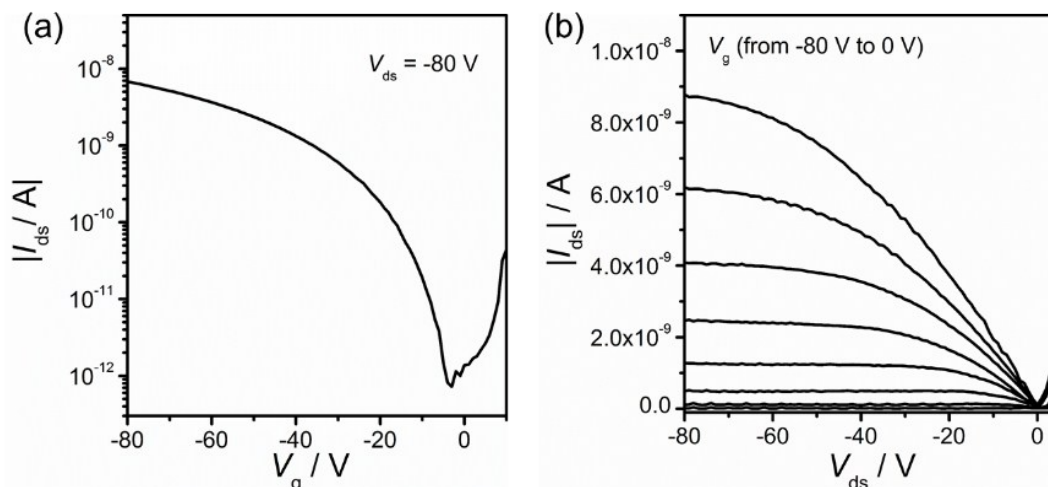

**Figure S31.** (a) Transfer curve and (b) output curve of transistors based on the spin-coated film of **1**.

## 9. NMR characterization

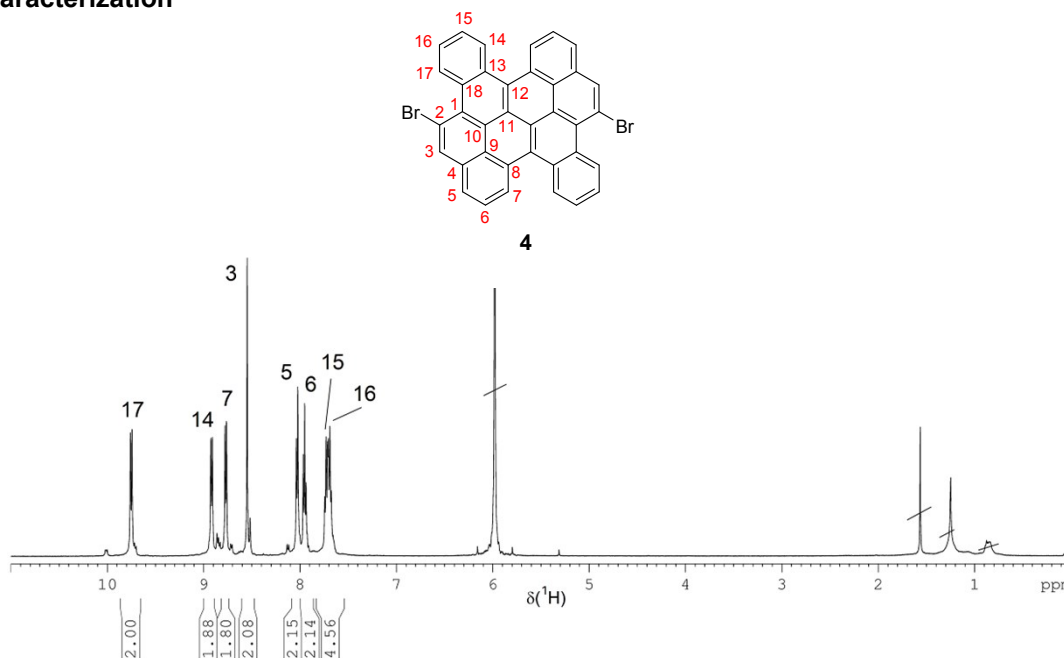

**Figure S32.** <sup>1</sup>H NMR spectrum of **4** (solvent: C<sub>2</sub>D<sub>2</sub>Cl<sub>4</sub>, 30 °C).

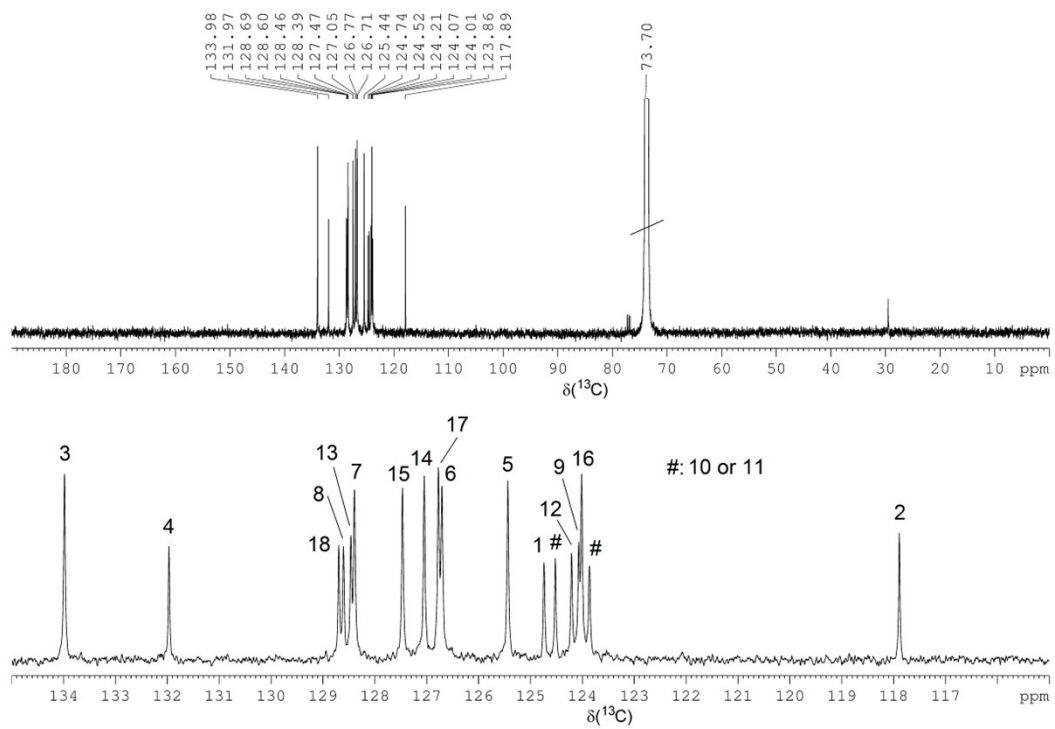

Figure S33.  $^{13}\text{C}$  NMR spectrum of **4** (solvent:  $\text{C}_2\text{D}_2\text{Cl}_4$ ,  $30^\circ\text{C}$ ).

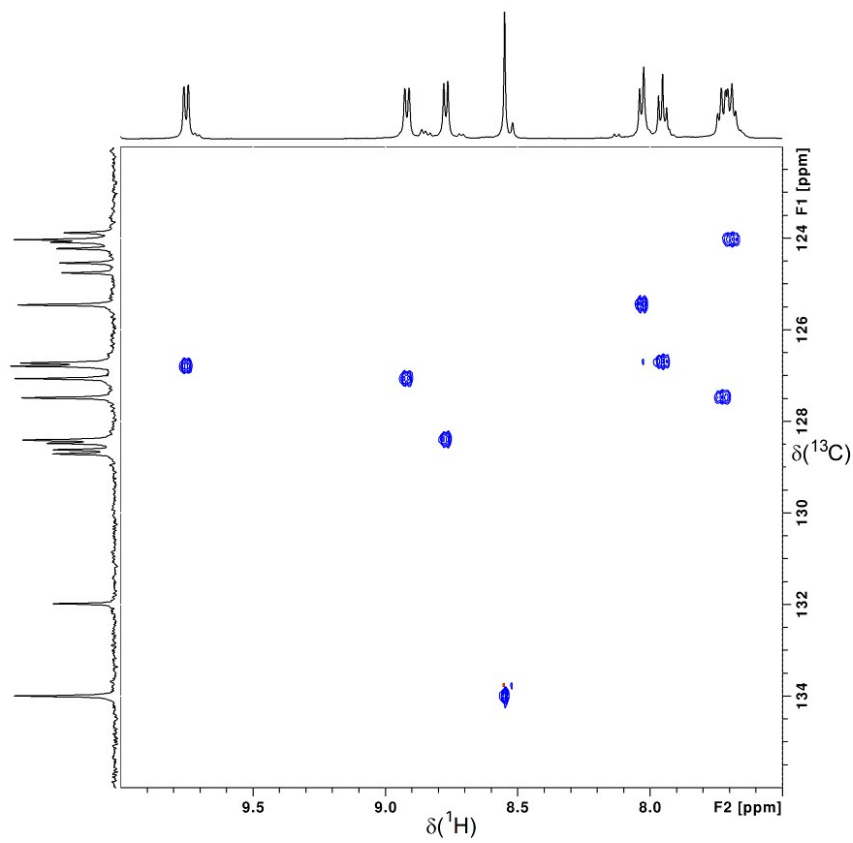

Figure S34. HSQC spectrum of **4** (solvent:  $\text{C}_2\text{D}_2\text{Cl}_4$ ,  $30^\circ\text{C}$ ).



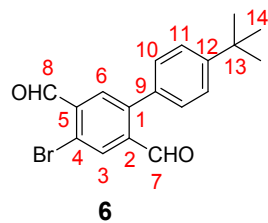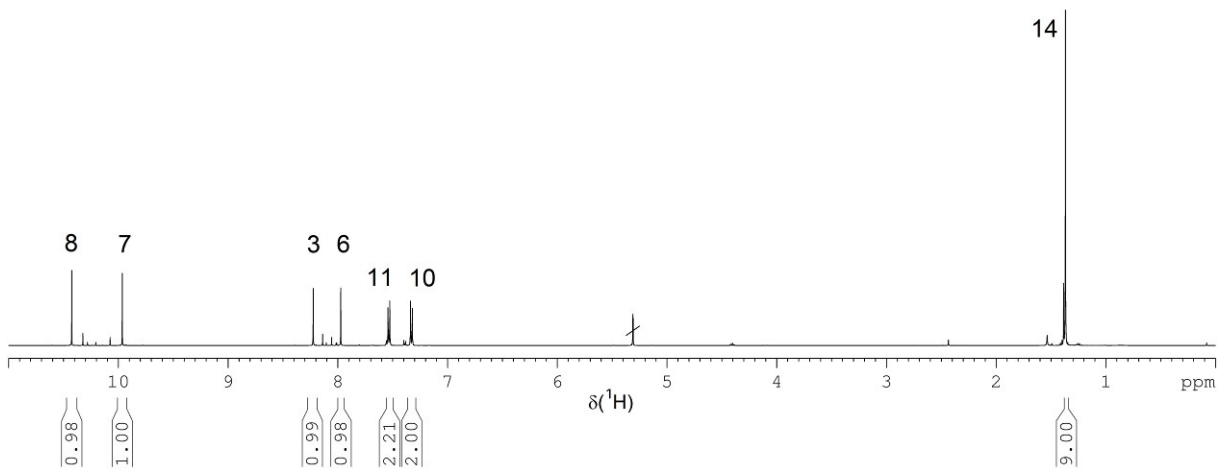

**Figure S35.**  $^1\text{H}$  NMR spectrum of **6** (solvent:  $\text{CD}_2\text{Cl}_2$ ,  $30^\circ\text{C}$ ).

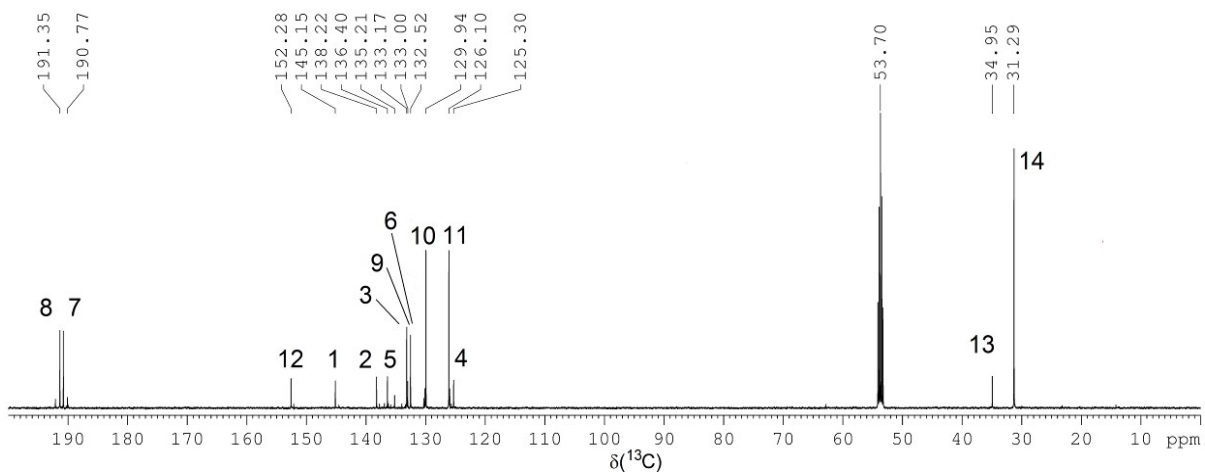

**Figure S36.**  $^{13}\text{C}$  NMR spectrum of **6** (solvent:  $\text{CD}_2\text{Cl}_2$ ,  $30^\circ\text{C}$ ).

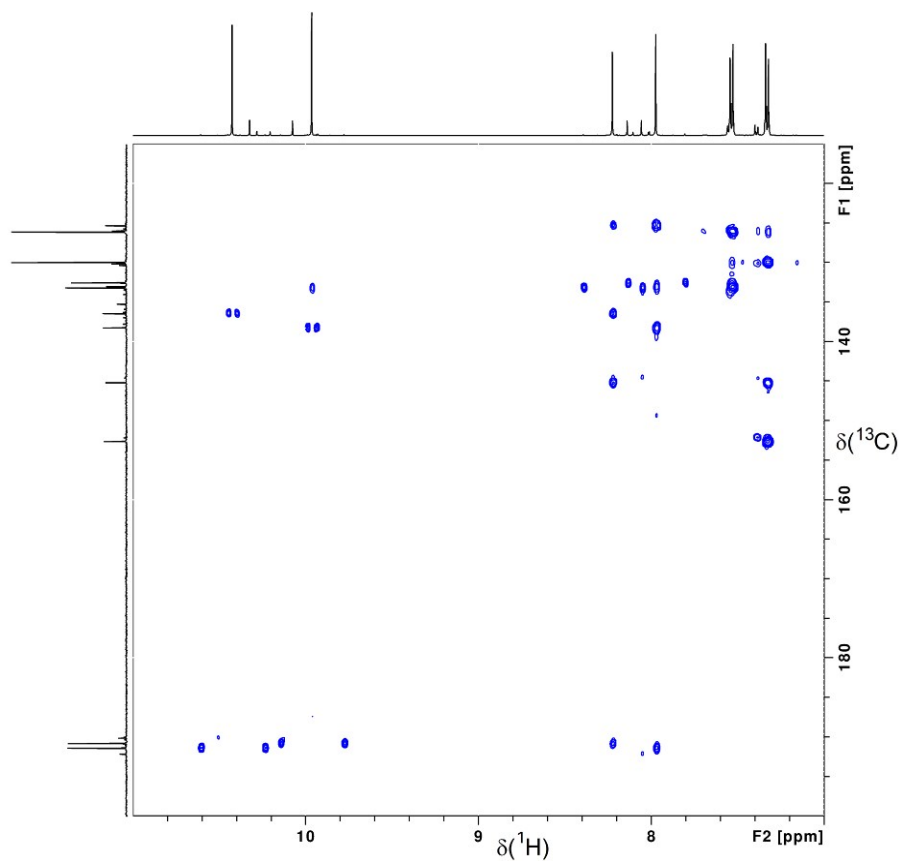

Figure S37. HMBC spectrum (region) of **6** (solvent: CD<sub>2</sub>Cl<sub>2</sub>, 30°C).

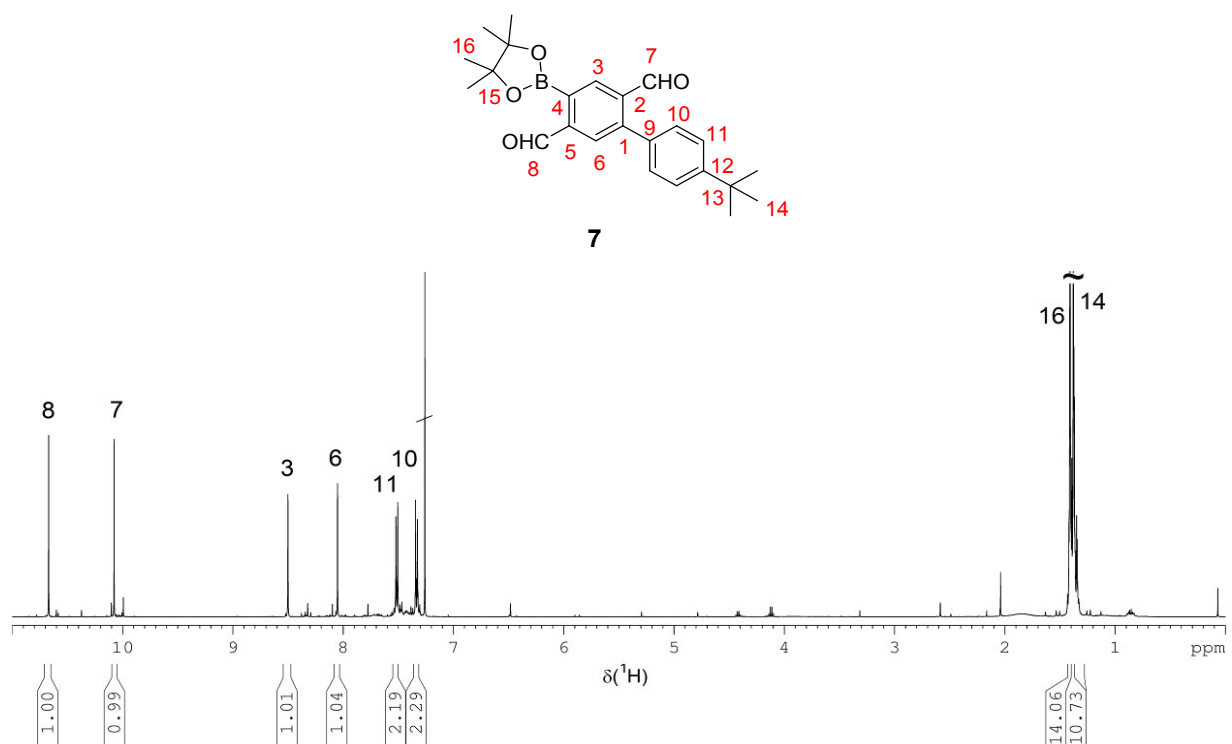

Figure S38. <sup>1</sup>H NMR spectrum of **7** (solvent: CDCl<sub>3</sub>, 30°C).

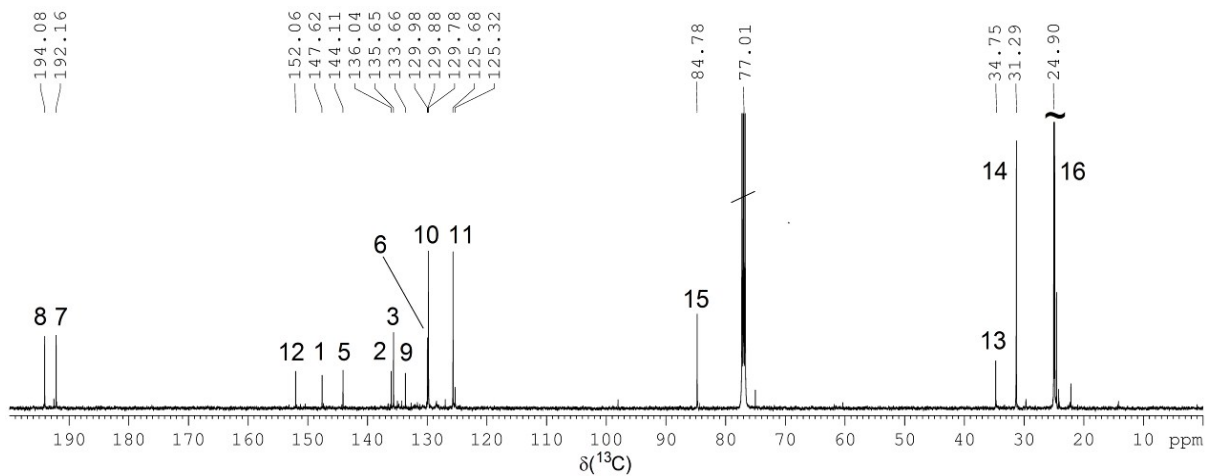

**Figure S39.**  $^{13}\text{C}$  NMR spectrum of **7** (solvent:  $\text{CDCl}_3$ ,  $30^\circ\text{C}$ ).

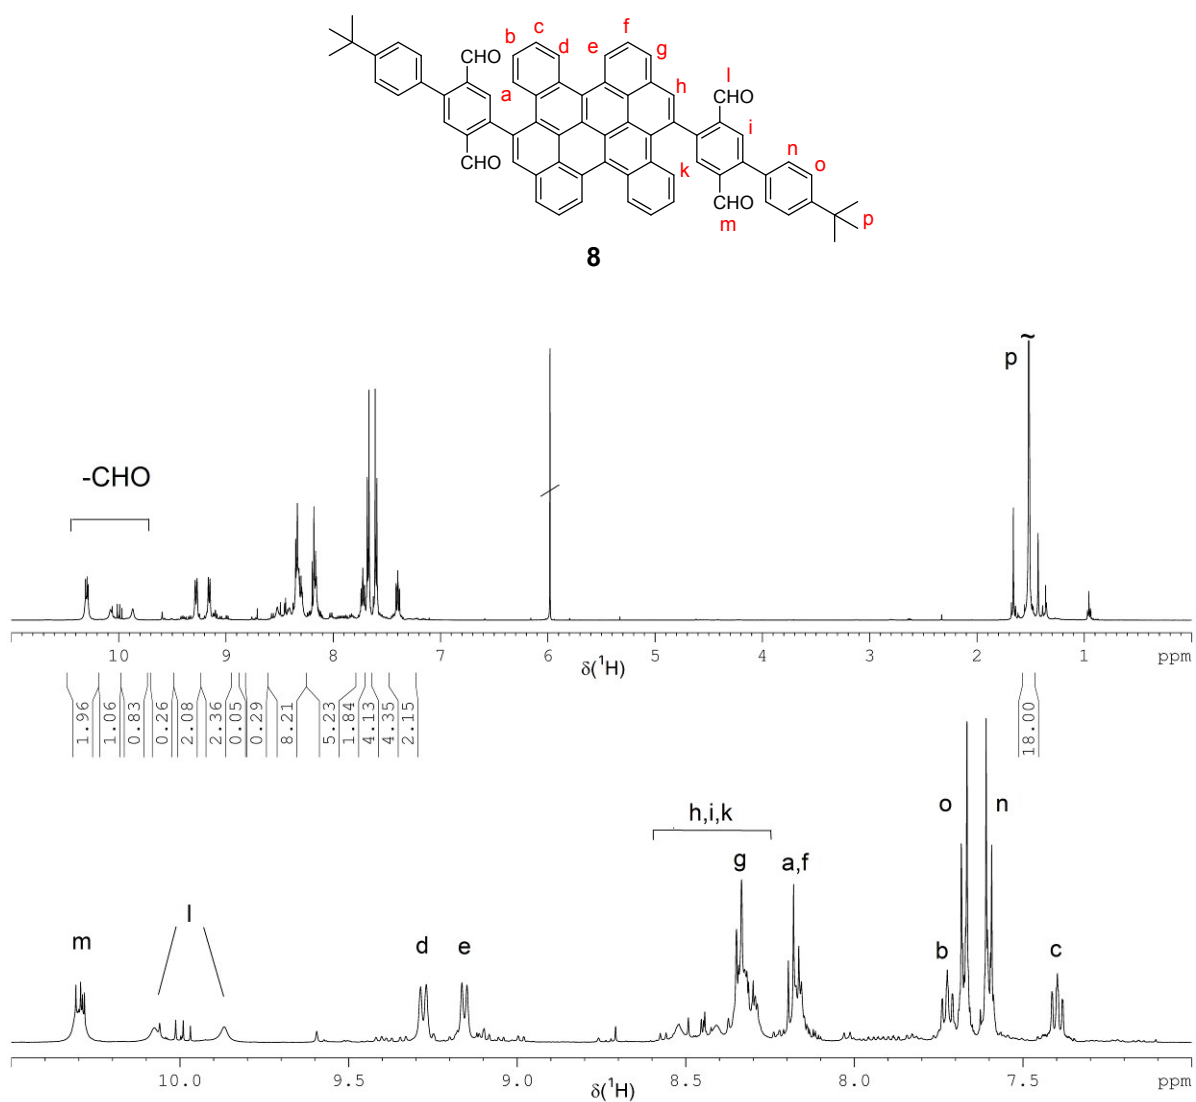

**Figure S40.**  $^1\text{H}$  NMR spectrum of **8** (solvent:  $\text{C}_2\text{D}_2\text{Cl}_4$ ,  $120^\circ\text{C}$ ).

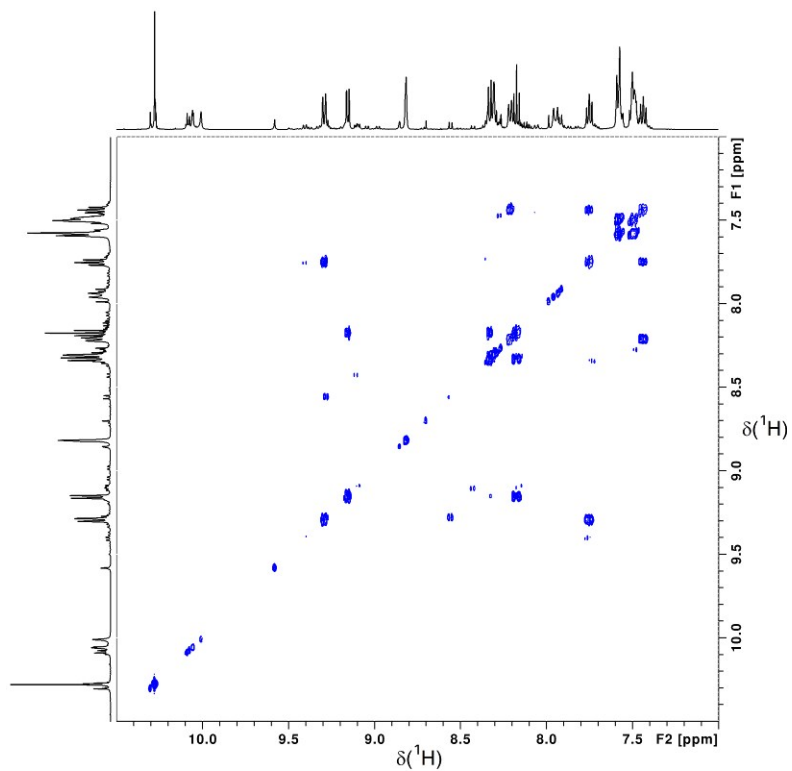

**Figure S41.** COSY spectrum (region) of **8** (solvent:  $\text{C}_2\text{D}_2\text{Cl}_4$ ,  $120^\circ\text{C}$ ).

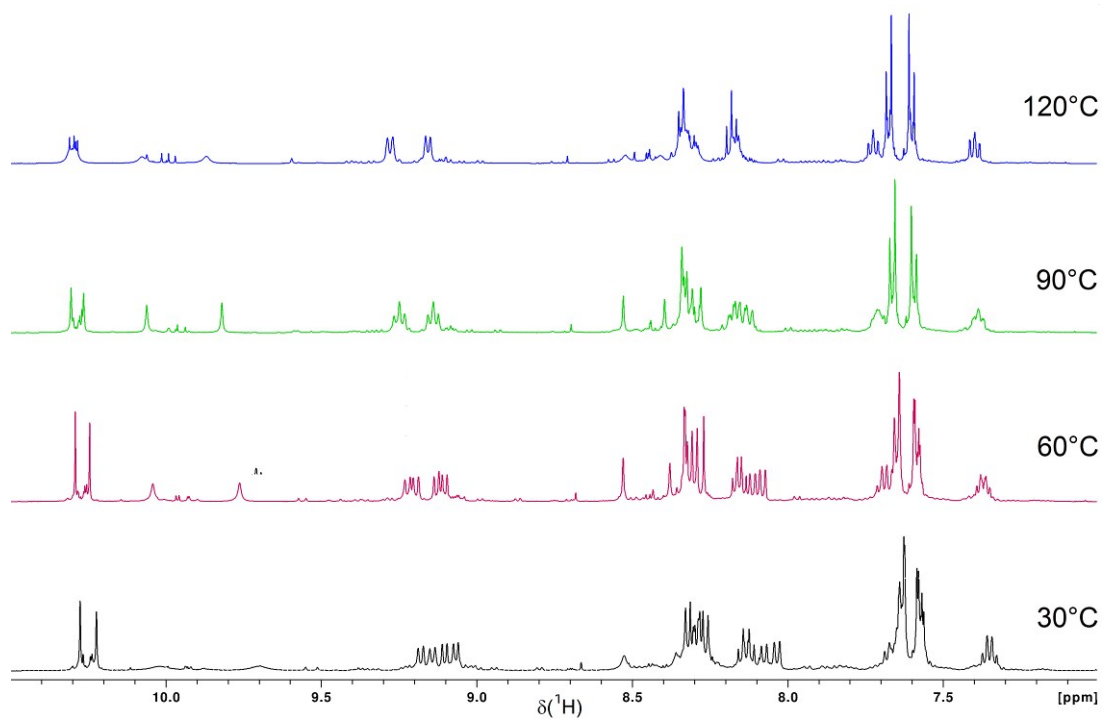

**Figure S42.** Variable-temperature  $^1\text{H}$  NMR spectra (region) of **8** indicating dynamic processes (solvent:  $\text{C}_2\text{D}_2\text{Cl}_4$ ).

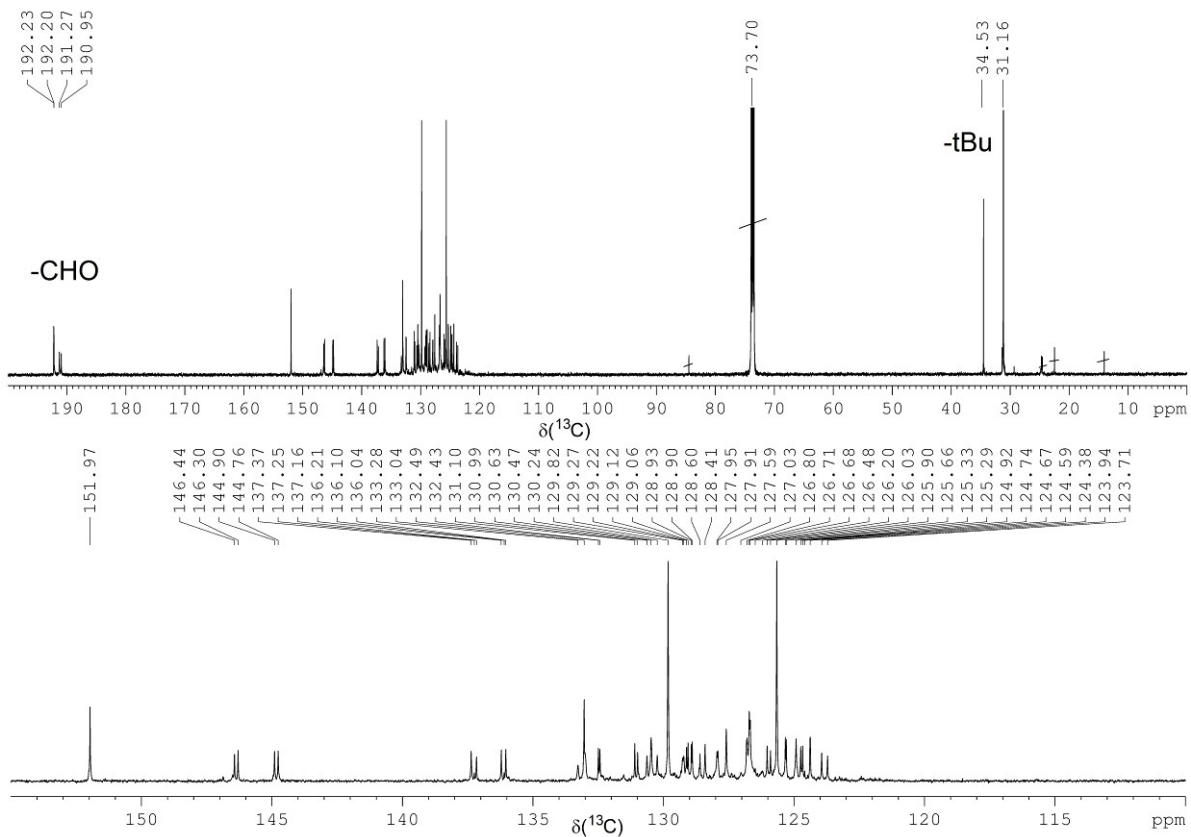

**Figure S43.**  $^{13}\text{C}$  NMR spectrum of **8** (solvent:  $\text{C}_2\text{D}_2\text{Cl}_4$ ,  $30^\circ\text{C}$ ).

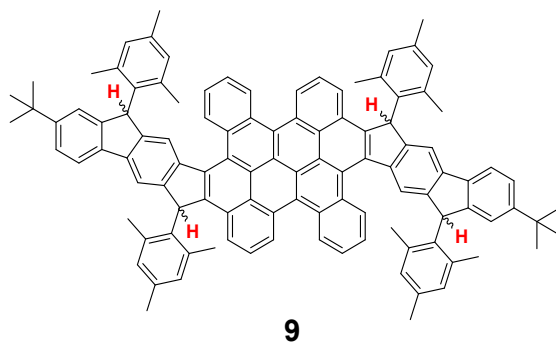

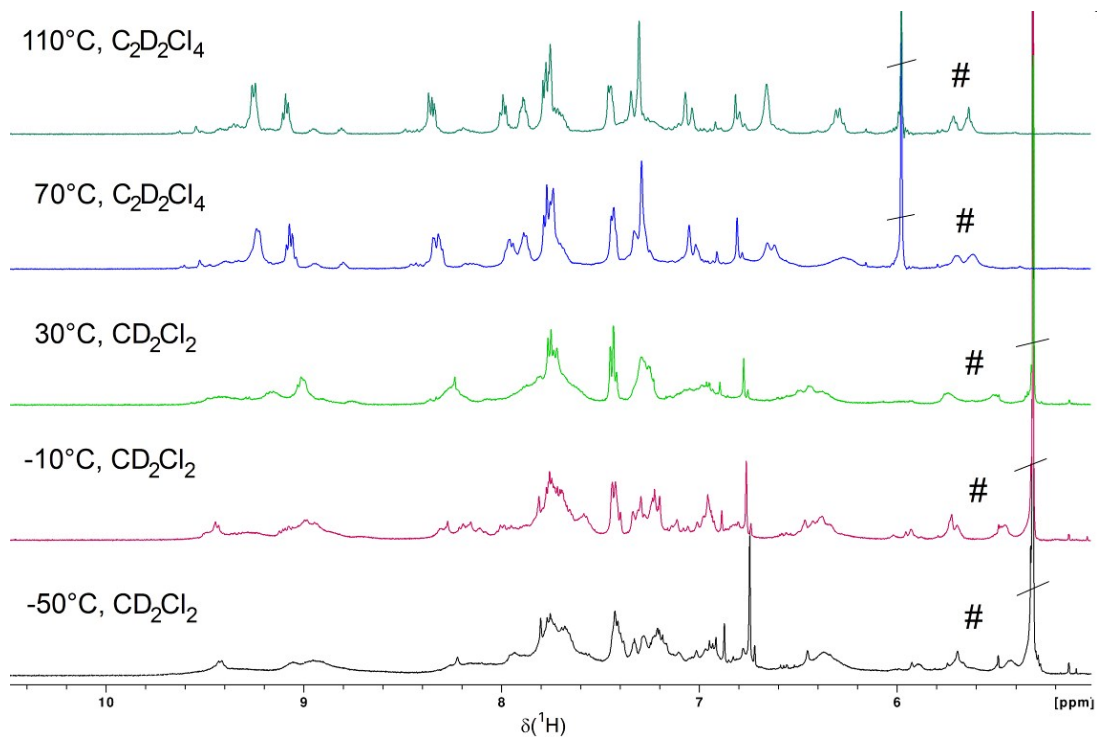

**Figure S44.**  $^1\text{H}$  NMR spectra (region) of **9** recorded in different solvents ( $\text{C}_2\text{D}_2\text{Cl}_4$ ,  $\text{CD}_2\text{Cl}_2$ ) and at different temperatures. Note the general trend of line narrowing with increasing temperature. # marks the signal group of the aliphatic ring protons. At  $-50^\circ\text{C}$  several signals were observed pointing to several isomers. With increasing temperature fast interconversion of isomers finally results in fewer CH signals.

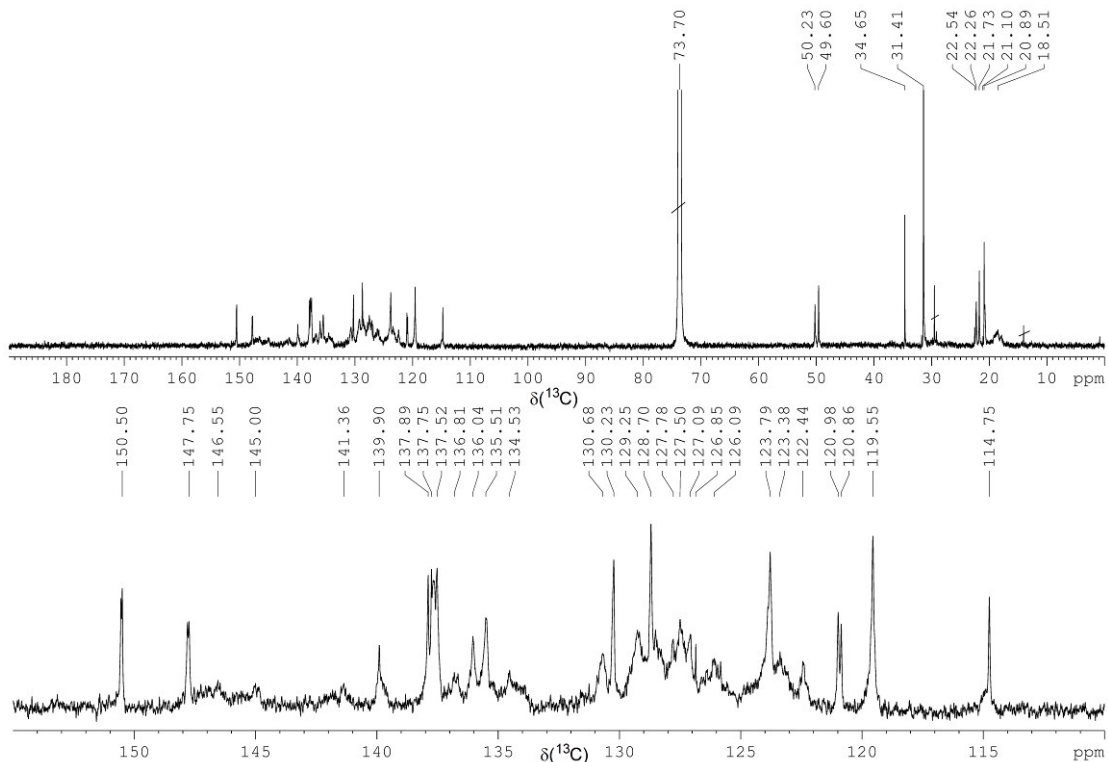

**Figure S45.**  $^{13}\text{C}$  NMR spectrum of **9** (solvent:  $\text{C}_2\text{D}_2\text{Cl}_4$ ,  $30^\circ\text{C}$ ).

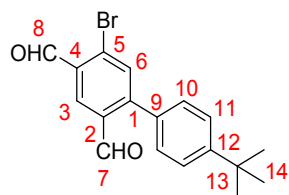

**11**

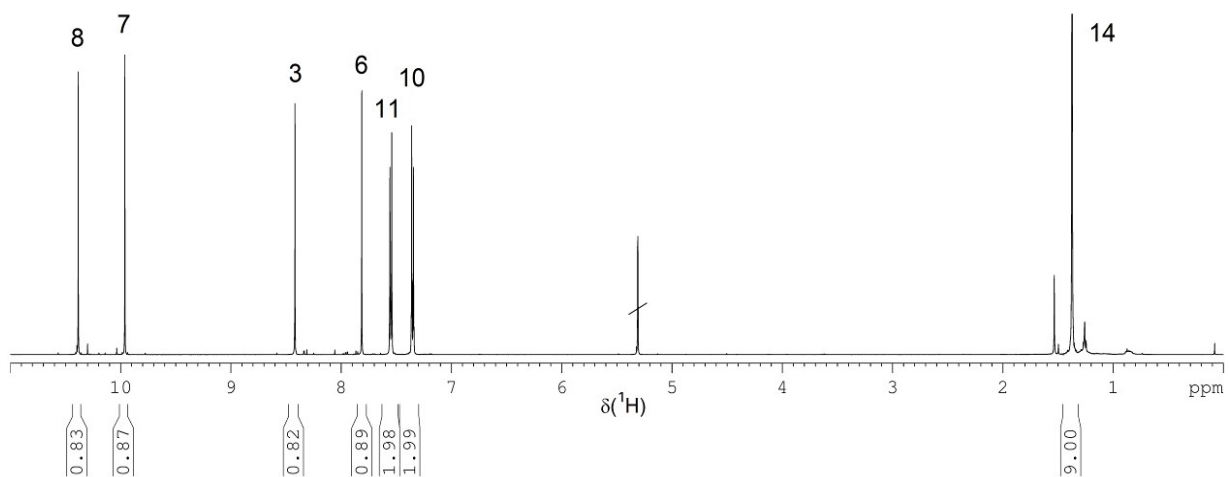

**Figure S46.**  $^1\text{H}$  NMR spectrum of **11** (solvent:  $\text{CD}_2\text{Cl}_2$ ,  $30^\circ\text{C}$ ).

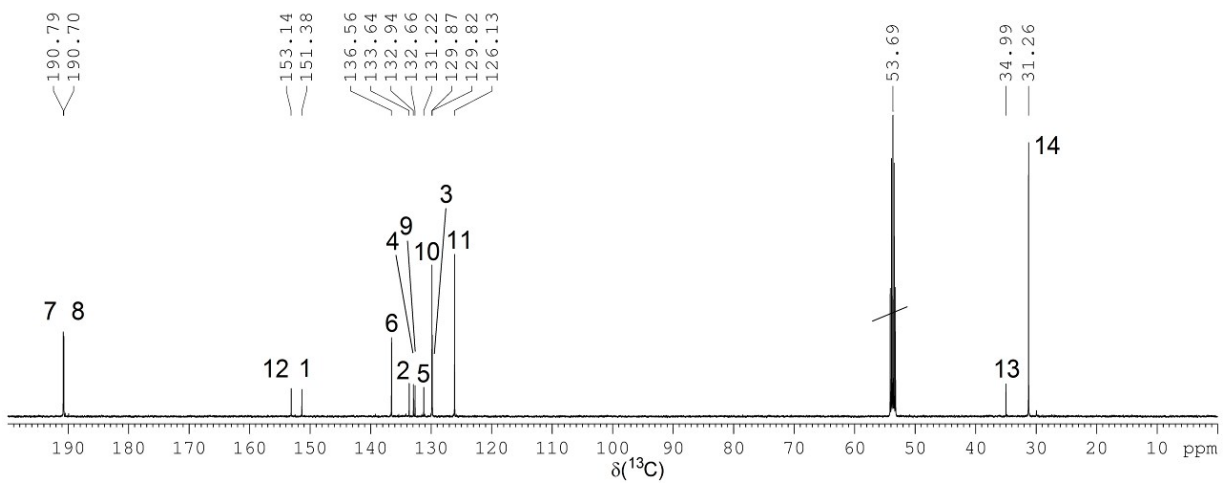

**Figure S47.**  $^{13}\text{C}$  NMR spectrum of **11** (solvent:  $\text{CD}_2\text{Cl}_2$ ,  $30^\circ\text{C}$ ).

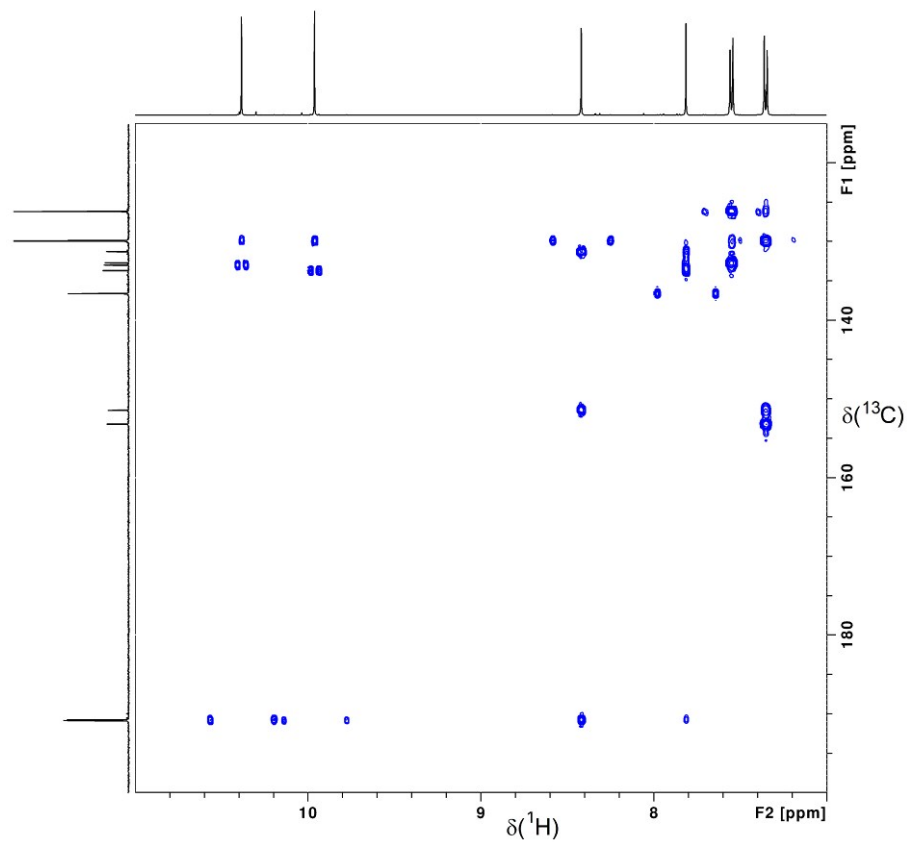

**Figure S48.** HMBC spectrum (region) of **11** (solvent: CD<sub>2</sub>Cl<sub>2</sub>, 30°C).

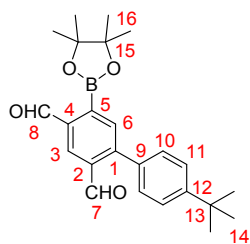

**12**

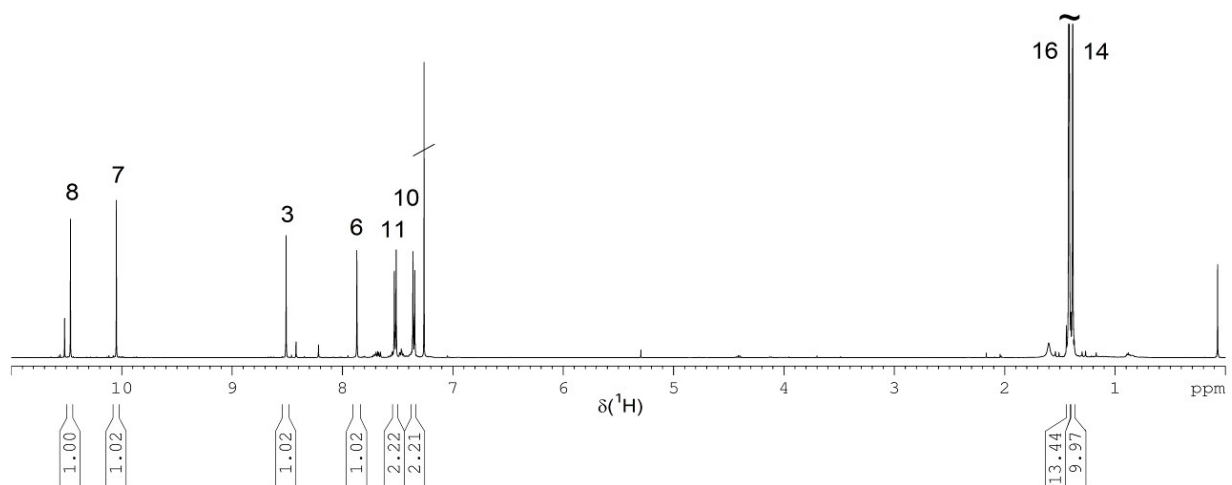

**Figure S49.** <sup>1</sup>H NMR spectrum of **12** (solvent: CDCl<sub>3</sub>, 30°C).



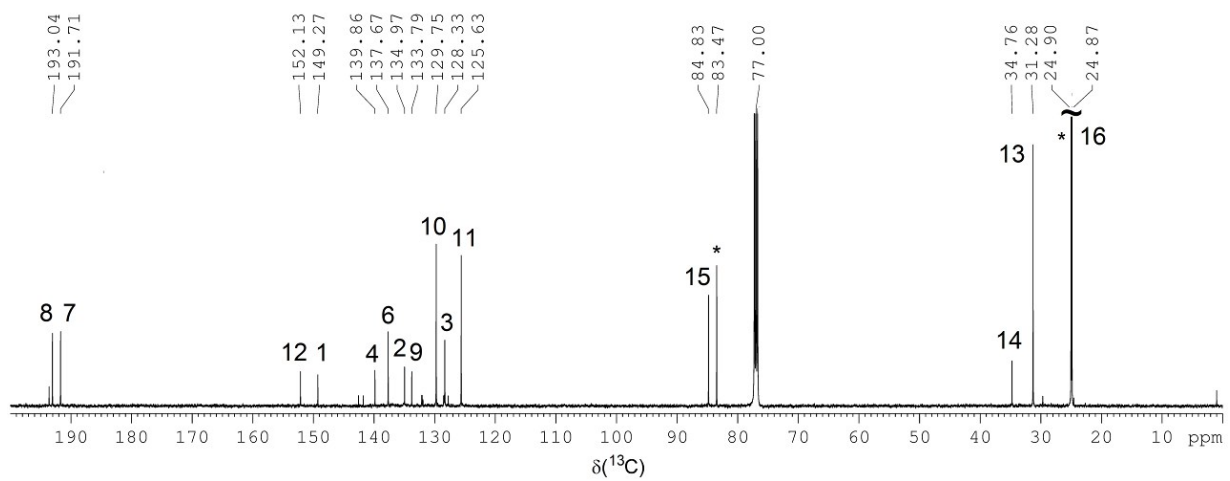

**Figure S50.**  $^{13}\text{C}$  NMR spectrum of **12** (solvent:  $\text{CDCl}_3$ ,  $30^\circ\text{C}$ ). \* marks signals of a further 4,4,5,5-tetramethyl-1,3,2-dioxaborolane derivative.

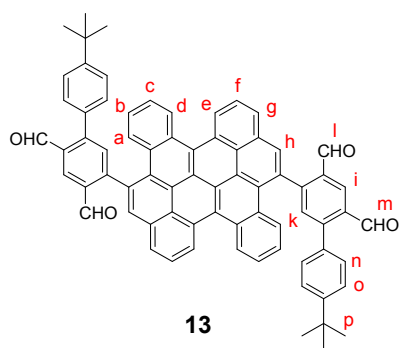

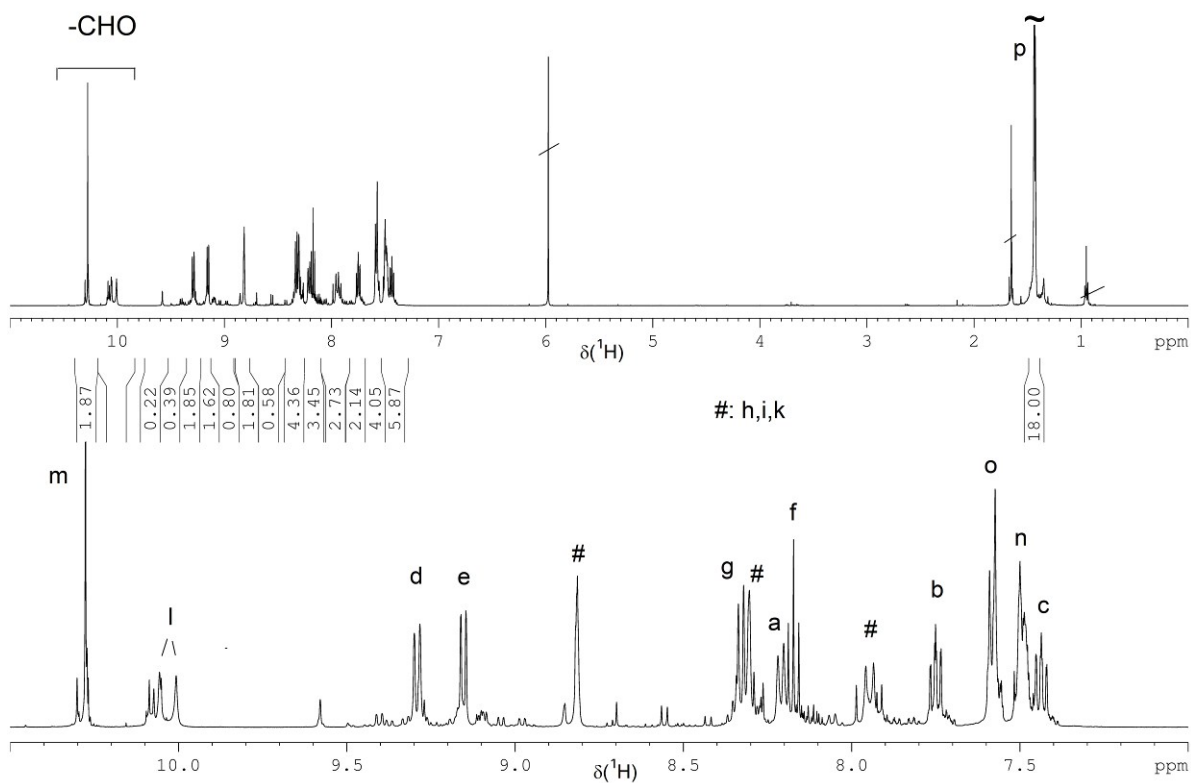

Figure S51.  $^1\text{H}$  NMR spectrum of **13** (solvent:  $\text{C}_2\text{D}_2\text{Cl}_4$ ,  $120^\circ\text{C}$ ).

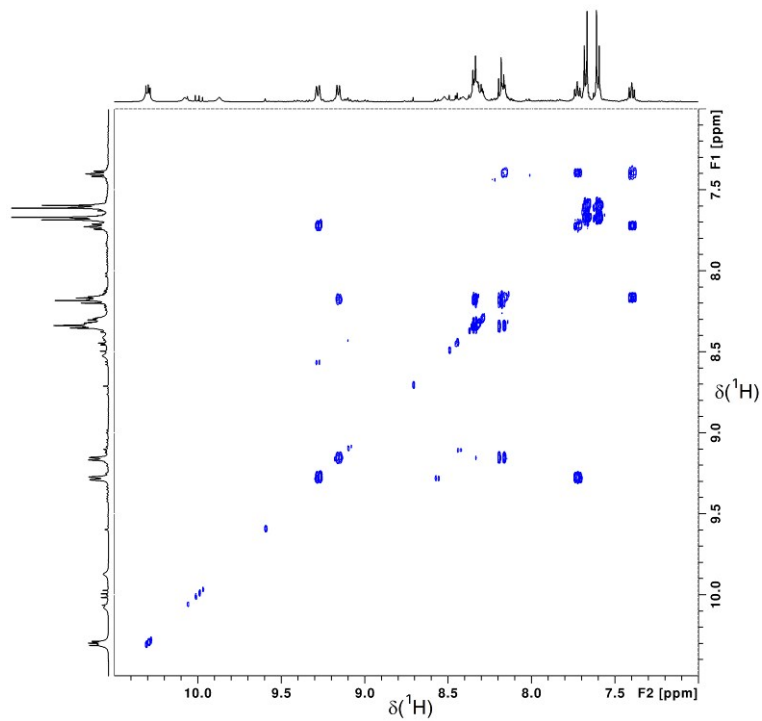

Figure S52. COSY spectrum of **13** (solvent:  $\text{C}_2\text{D}_2\text{Cl}_4$ ,  $120^\circ\text{C}$ ).

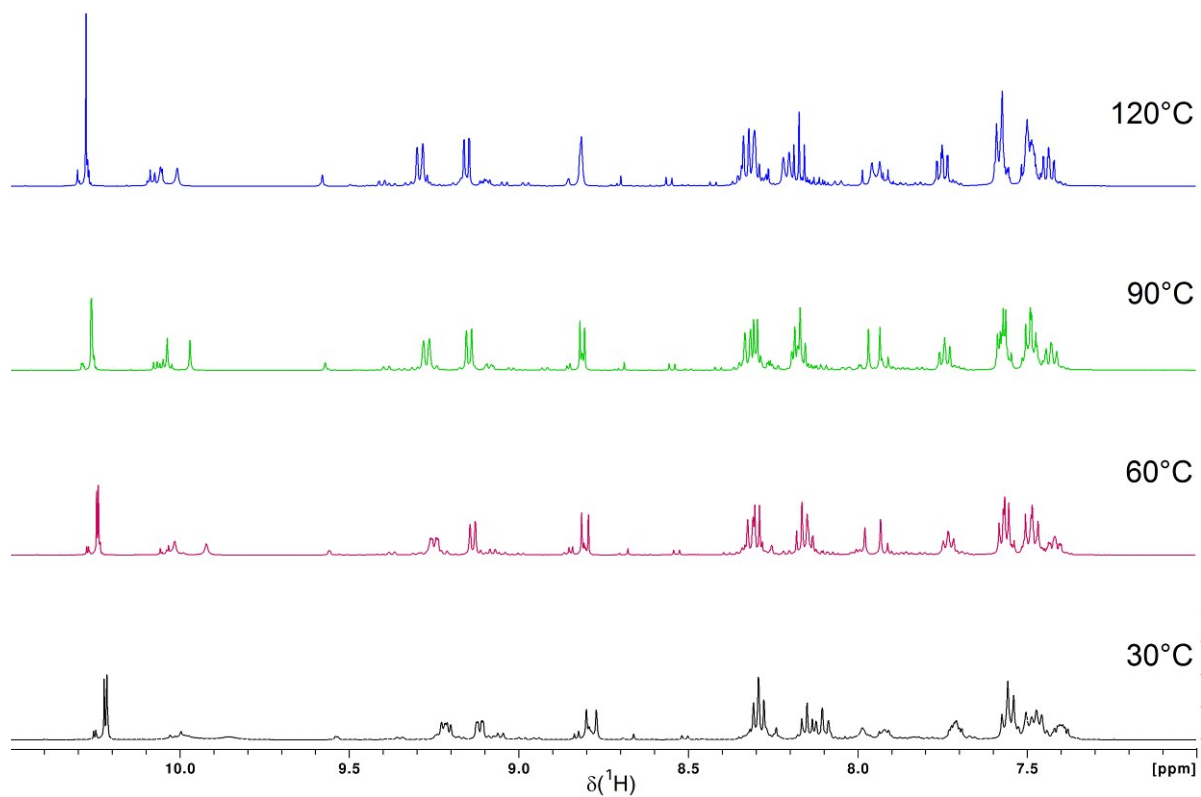

**Figure S53.** Variable-temperature  $^1\text{H}$  NMR spectra (region) of **13** indicating dynamic processes (solvent:  $\text{C}_2\text{D}_2\text{Cl}_4$ ).

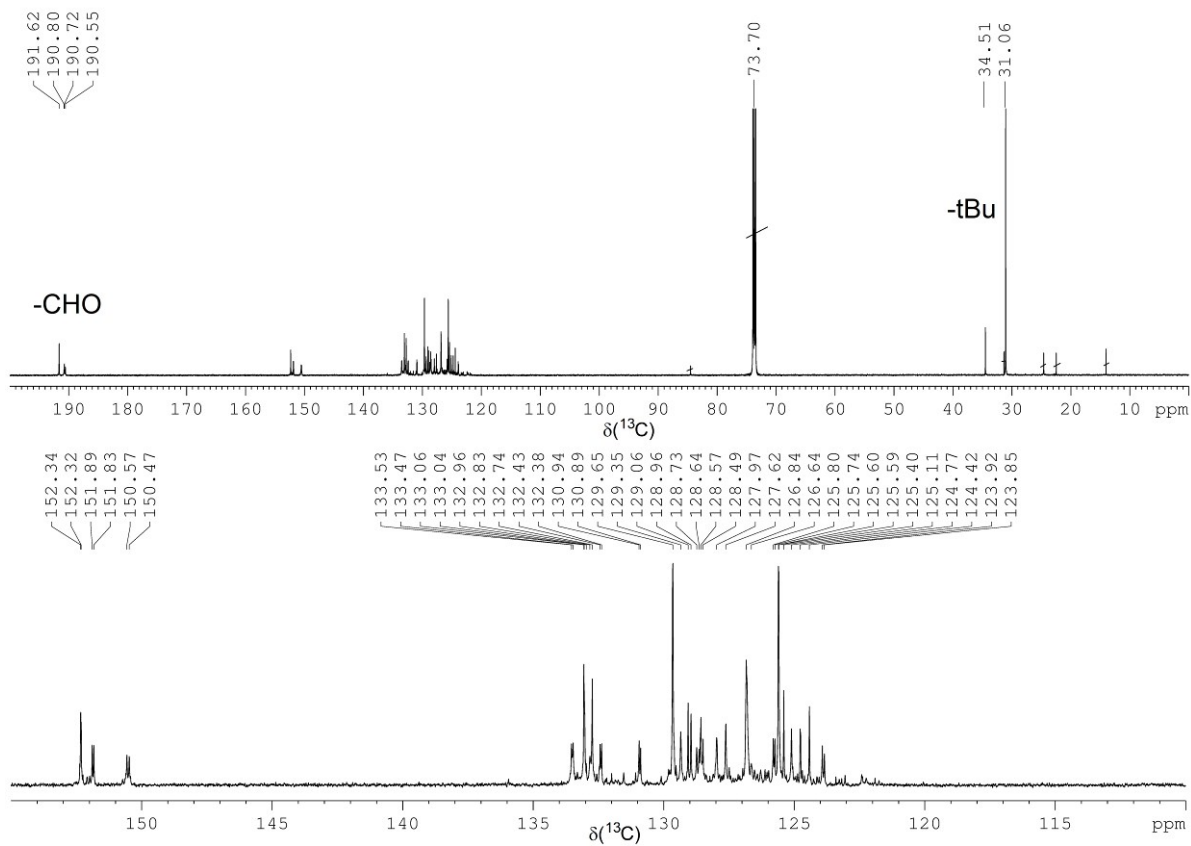

**Figure S54.**  $^{13}\text{C}$  NMR spectrum of **13** (solvent:  $\text{C}_2\text{D}_2\text{Cl}_4$ ,  $30^\circ\text{C}$ ).

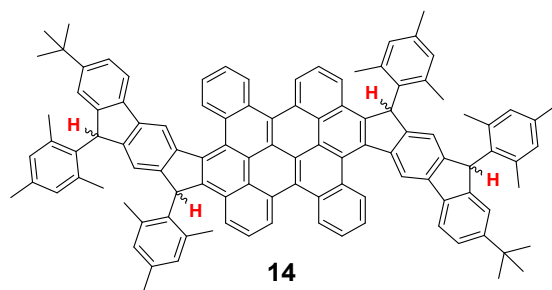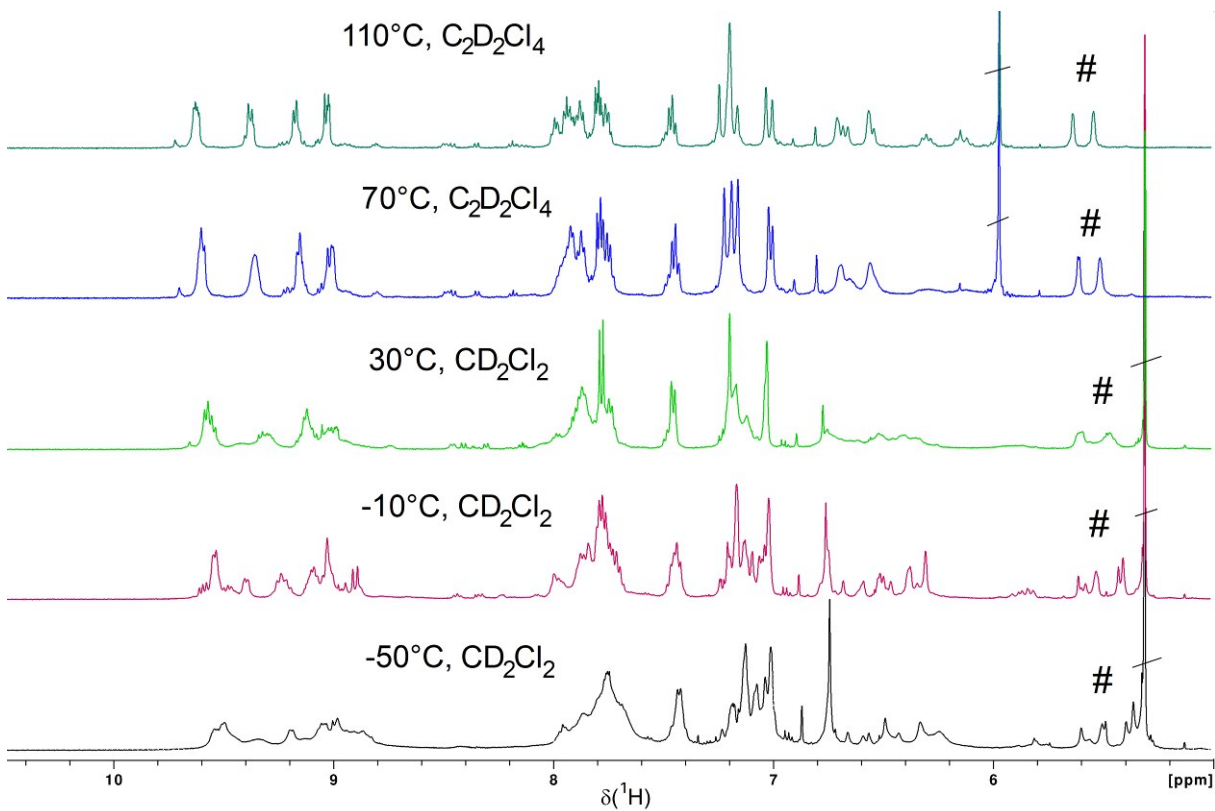

**Figure S55.** <sup>1</sup>H NMR spectra (region) of **14** recorded in different solvents (C<sub>2</sub>D<sub>2</sub>Cl<sub>4</sub>, CD<sub>2</sub>Cl<sub>2</sub>) and at different temperatures. Note the general trend of line narrowing with increasing temperature. # marks the signal group of the aliphatic ring protons. At -50°C several signals were observed pointing to several isomers. With increasing temperature fast interconversion of isomers finally results in two CH signals.

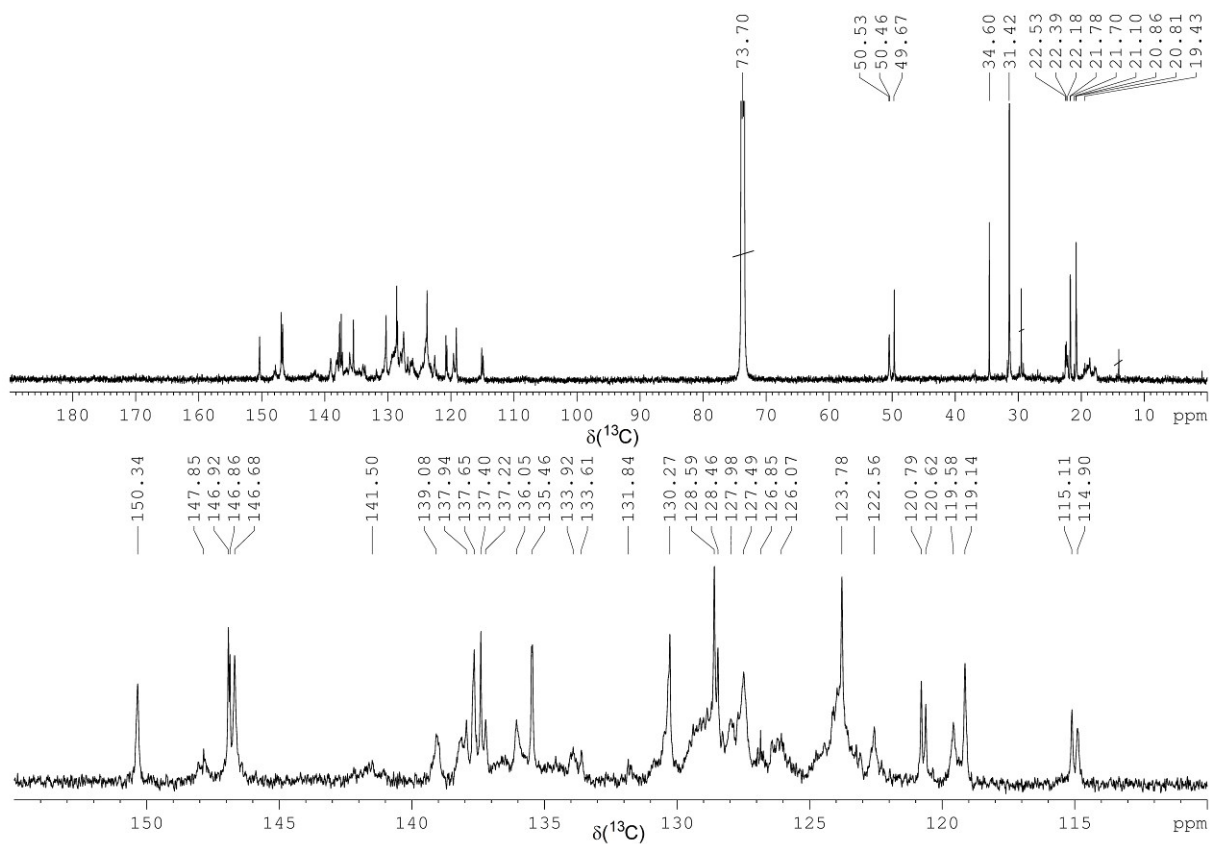

**Figure S56.**  $^{13}\text{C}$  NMR spectrum of **14** (solvent:  $\text{C}_2\text{D}_2\text{Cl}_4$ ,  $30^\circ\text{C}$ ).

## 10. High resolution mass spectra (HR-MS)

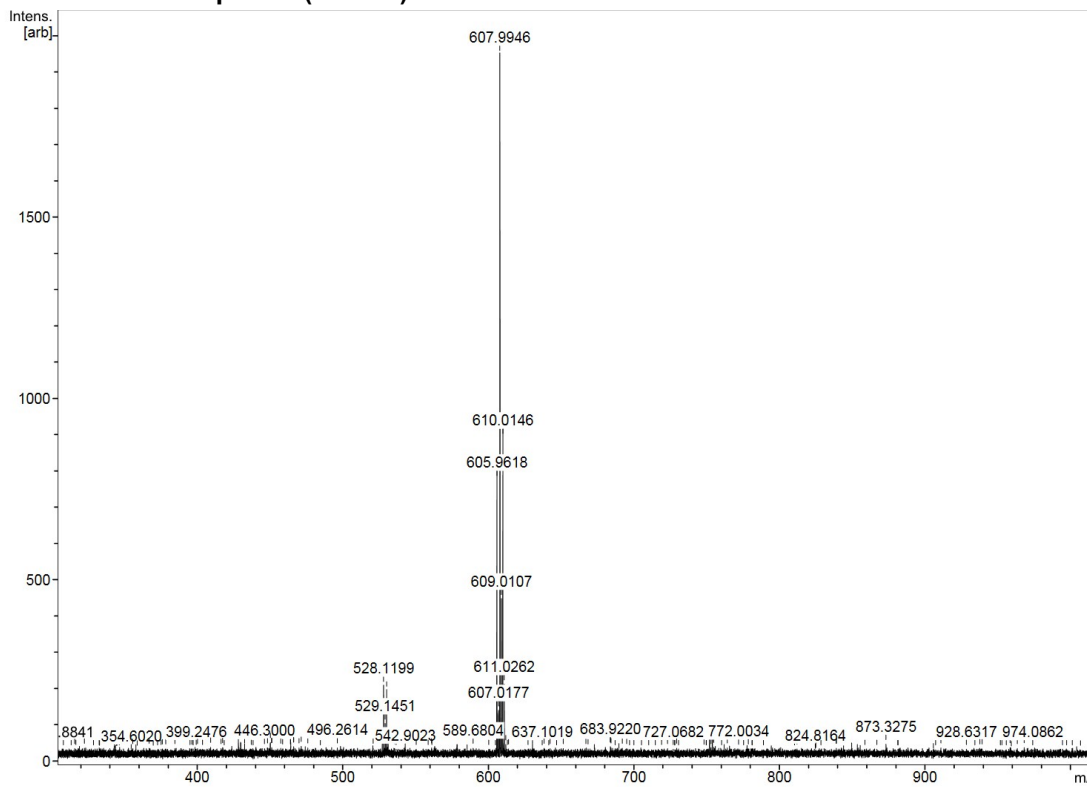

Figure S57. HR-MALDI-TOF mass spectrum of compound 4.

### Compound Table

| Label                | Tgt Score | Mass Error (ppm) | Tgt Formula   | Obs. RT | Ref. Mass | Obs. Mass |
|----------------------|-----------|------------------|---------------|---------|-----------|-----------|
| Cpd 1: C18 H17 Br O2 | 97.65     | -1.51            | C18 H17 Br O2 | 1.421   | 344.04119 | 344.04067 |

| Obs. <i>m/z</i> | Obs. RT | Obs. Mass | Tgt Formula   | Tgt Mass  | Tgt Mass Error (ppm) | RT Diff.        | Find Cpd Algorithm |
|-----------------|---------|-----------|---------------|-----------|----------------------|-----------------|--------------------|
| 345.0317        | 1.421   | 344.04067 | C18 H17 Br O2 | 344.04119 | -1.51                | Find By Formula |                    |

### MS Zoomed Spectrum

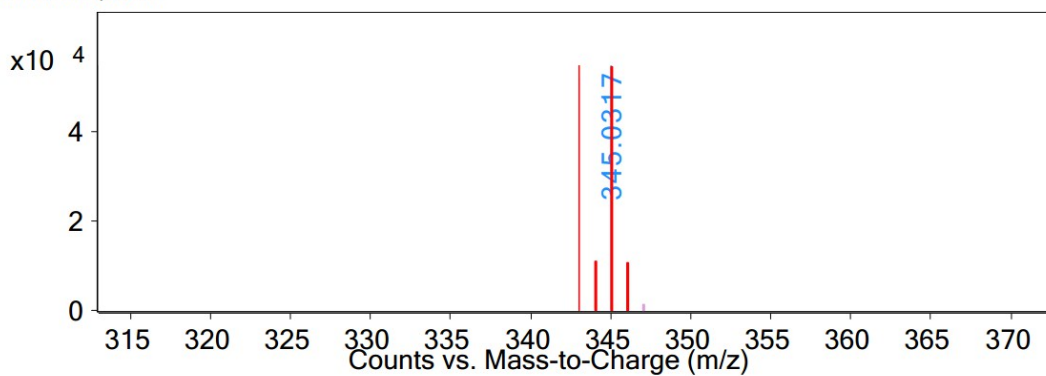

Figure S58. HR-ESI mass spectrum of compound 6.

**Compound Table**

| Label                                                   | Tgt Score | Mass Error (ppm) | Tgt Formula                                      | Obs. RT | Ref. Mass | Obs. Mass |
|---------------------------------------------------------|-----------|------------------|--------------------------------------------------|---------|-----------|-----------|
| Cpd 1: C <sub>24</sub> H <sub>29</sub> B O <sub>4</sub> | 42.68     | -0.45            | C <sub>24</sub> H <sub>29</sub> B O <sub>4</sub> | 1.587   | 391.21952 | 391.21935 |

| Obs. m/z | Obs. RT | Obs. Mass | Tgt Formula                                      | Tgt Mass  | Tgt Mass Error (ppm) | RT Diff.        | Find Cpds Algorithm |
|----------|---------|-----------|--------------------------------------------------|-----------|----------------------|-----------------|---------------------|
| 393.2233 | 1.587   | 391.21935 | C <sub>24</sub> H <sub>29</sub> B O <sub>4</sub> | 391.21952 | -0.45                | Find By Formula |                     |

MS Zoomed Spectrum

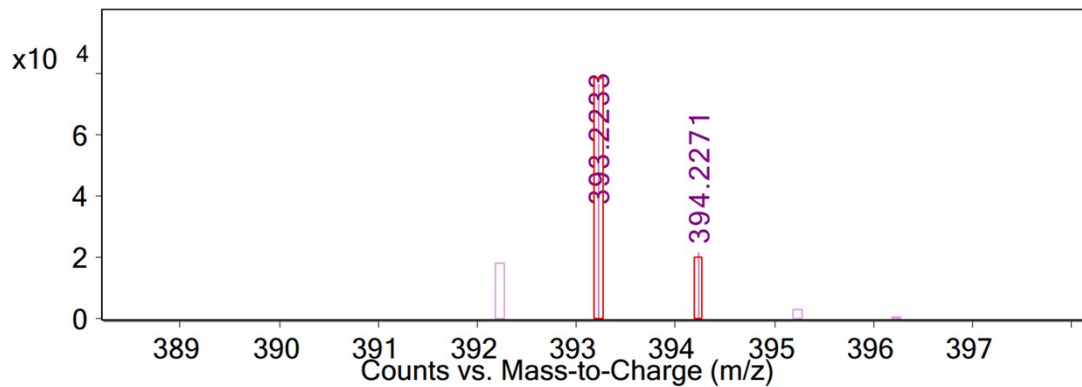

**Figure S59.** HR-ESI mass spectrum of compound 7.

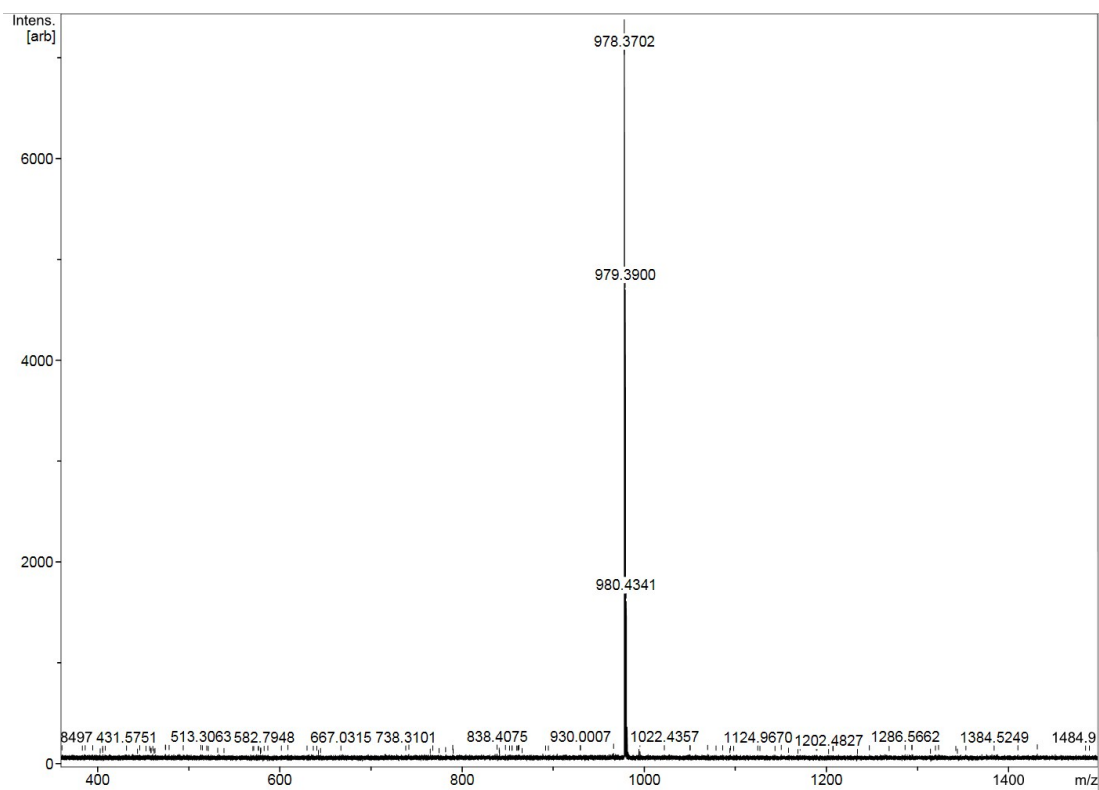

**Figure S60.** HR-MALDI-TOF mass spectrum of compound 8.



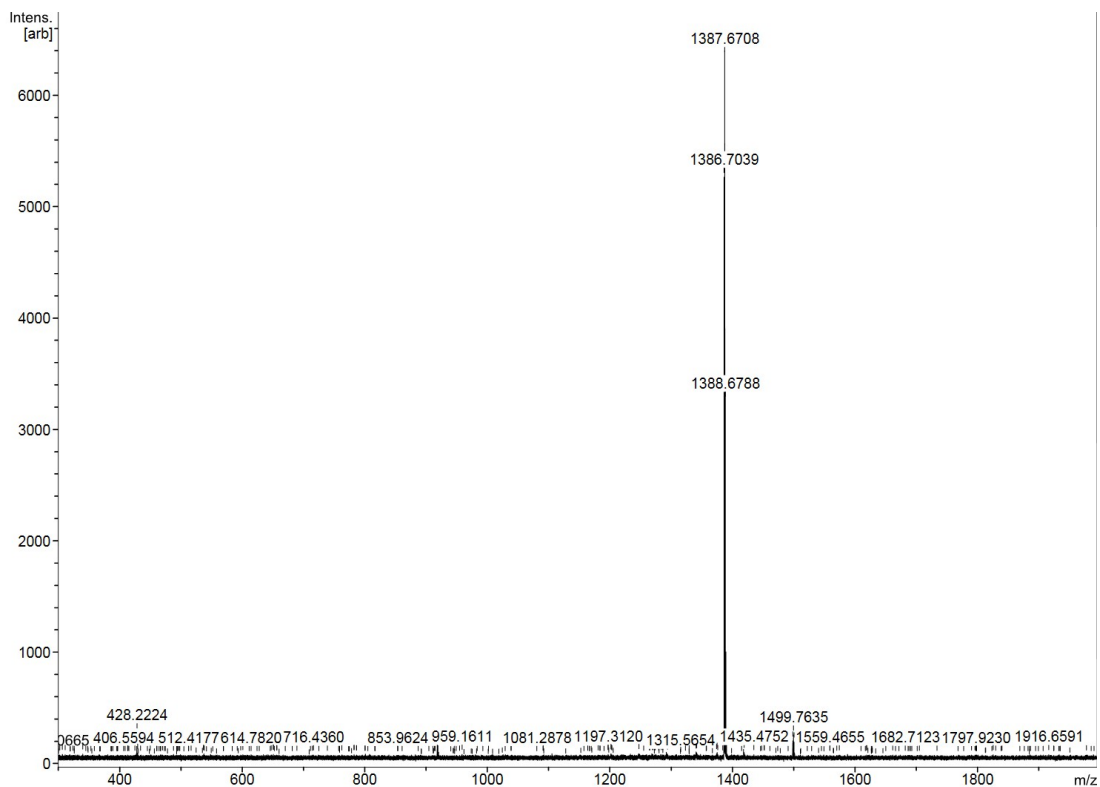

Figure S61. HR-MALDI-TOF mass spectrum of compound 9.

**Compound Table**

| Label                | Tgt Score | Mass Error (ppm) | Tgt Formula   | Obs. RT | Ref. Mass | Obs. Mass |
|----------------------|-----------|------------------|---------------|---------|-----------|-----------|
| Cpd 1: C18 H17 Br O2 | 96.18     | -1.61            | C18 H17 Br O2 | 2.005   | 344.04119 | 344.04064 |

| Obs. m/z | Obs. RT | Obs. Mass | Tgt Formula   | Tgt Mass  | Tgt Mass Error (ppm) | RT Diff.        | Find Cpds Algorithm |
|----------|---------|-----------|---------------|-----------|----------------------|-----------------|---------------------|
| 369.0283 | 2.005   | 344.04064 | C18 H17 Br O2 | 344.04119 | -1.61                | Find By Formula |                     |

MS Zoomed Spectrum

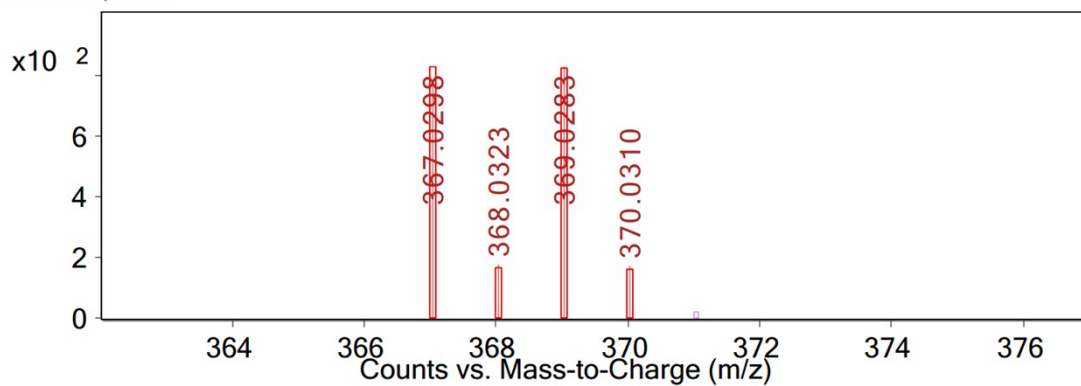

Figure S62. HR-ESI mass spectrum of compound 11.

**Compound Table**

| Label                                                   | Tgt Score | Mass Error (ppm) | Tgt Formula                                      | Obs. RT | Ref. Mass | Obs. Mass |
|---------------------------------------------------------|-----------|------------------|--------------------------------------------------|---------|-----------|-----------|
| Cpd 1: C <sub>24</sub> H <sub>29</sub> B O <sub>4</sub> | 58.87     | 0.67             | C <sub>24</sub> H <sub>29</sub> B O <sub>4</sub> | 1.671   | 391.21952 | 391.21978 |

| Obs. m/z | Obs. RT | Obs. Mass | Tgt Formula                                      | Tgt Mass  | Tgt Mass Error (ppm) | RT Diff.        | Find Cpd Algorithm |
|----------|---------|-----------|--------------------------------------------------|-----------|----------------------|-----------------|--------------------|
| 393.2237 | 1.671   | 391.21978 | C <sub>24</sub> H <sub>29</sub> B O <sub>4</sub> | 391.21952 | 0.67                 | Find By Formula |                    |

MS Zoomed Spectrum

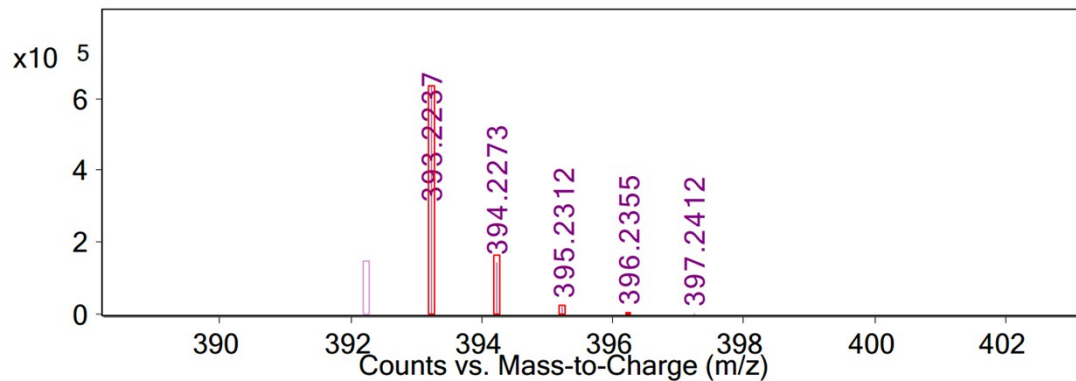

**Figure S63.** HR-ESI mass spectrum of compound 12.

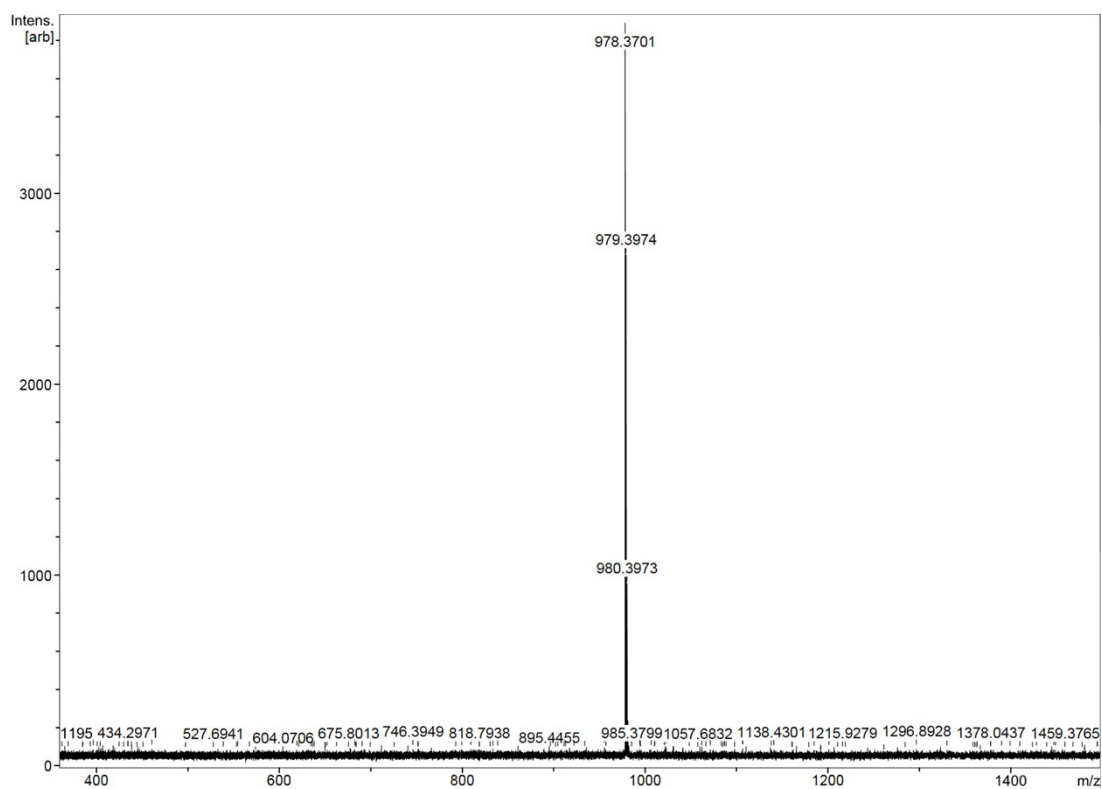

**Figure S64.** HR-MALDI-TOF mass spectrum of compound 13.

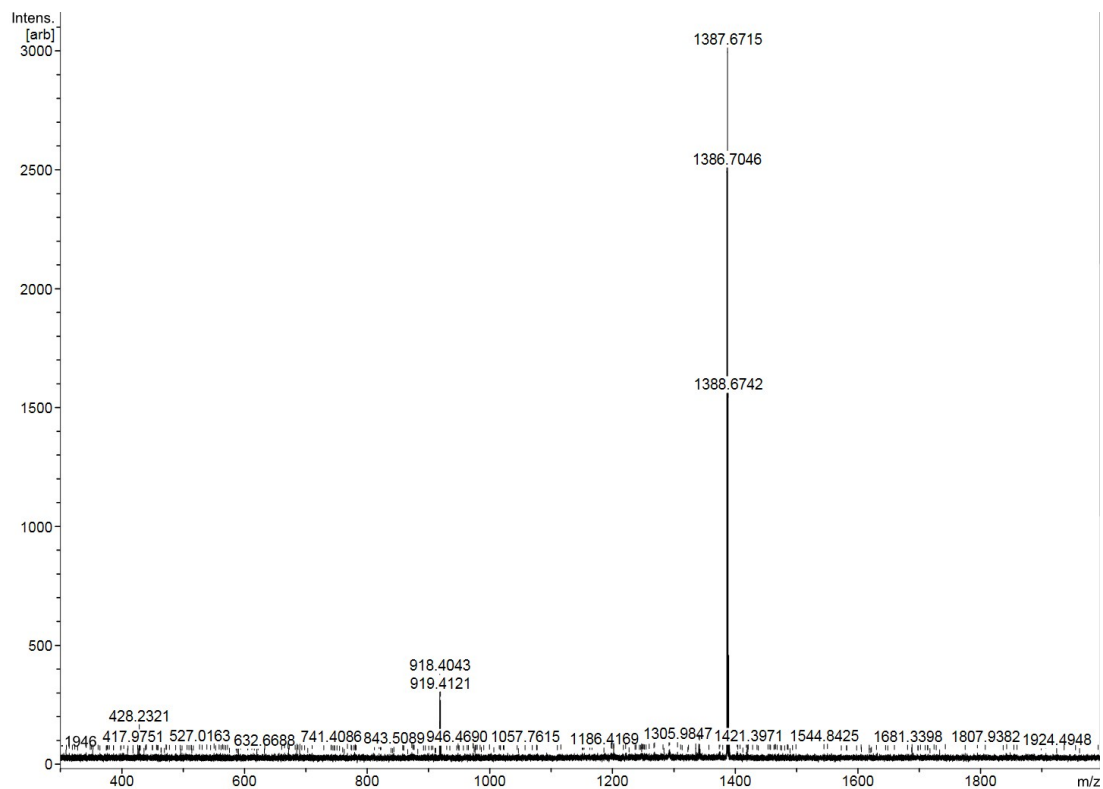

Figure S65. HR-MALDI-TOF mass spectrum of compound 14.

# 11. Elemental analysis

## EuroEA Elemental Analyser

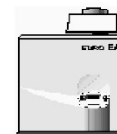

**AutoRun name** : 180212- (805)  
**Date of Analysis** : 12 Feb 2018  
**Time of Analysis** : 09:52:30  
**Analysed By** : EVR  
**Signed By** : EVR  
**Operator Group** : GRP1  
**Configuration** : CHNS

**Sample name** : T1-13-no  
**Sample position #** : 14  
**Type** : Smp  
**Sample weight** : 2.036 (mg)  
**Calibration type** : K-Factor

### Instrument Parameters

| Carrier (kPa) | Purge (ml/min) | Oxygen (ml) | Delta P O2 (kPa) | Sampling Delay (s) | Run Time (s) | Front (°C) | Rear (°C) | Oven (°C) |
|---------------|----------------|-------------|------------------|--------------------|--------------|------------|-----------|-----------|
| 50            | 100            | 15          | 25               | 10                 | 660          | 1000       | Off       | 70        |

### Chromatogram

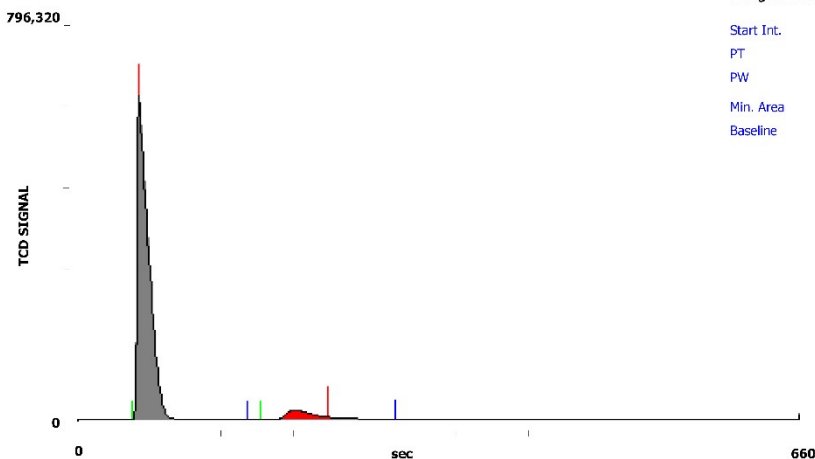

### Integration Parameters

|            |               |
|------------|---------------|
| Start Int. | 1             |
| PT         | 5             |
| PW         | 2             |
| Min. Area  | 100000        |
| Baseline   | Valley-Valley |

### Results

R

| Element  | RT (s)          | Start (s) | End (s) | Area                     | Area % | Element % |
|----------|-----------------|-----------|---------|--------------------------|--------|-----------|
| Nitrogen | -               | -         | -       | -                        | -      | -         |
| Carbon   | 57              | 51        | 156     | 8,696,803                | 92.636 | 70.042    |
| Hydrogen | 228             | 167       | 290     | 691,368                  | 7.364  | 2.431     |
| Sulphur  | -               | -         | -       | -                        | -      | -         |
| Oxygen   | -               | -         | -       | -                        | -      | -         |
|          | <i>K-Factor</i> |           |         | <i>KFactor (Average)</i> |        |           |
| Nitrogen | -               | -         | -       | 4.612535 E-07            | -      | -         |
| Carbon   | -               | -         | -       | 1.639756 E-07            | -      | -         |
| Hydrogen | -               | -         | -       | 7.157954 E-08            | -      | -         |
| Sulphur  | -               | -         | -       | 4.040296 E-07            | -      | -         |
| Oxygen   | -               | -         | -       | -                        | -      | -         |

12 Feb 2018 16:16:20 AutoRun: 180212- (805)

Figure S66. Elemental analysis of compound 4.

## EuroEA Elemental Analyser

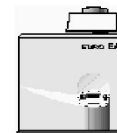

**AutoRun name** : 180205- (800)  
**Date of Analysis** : 05 Feb 2018  
**Time of Analysis** : 09:30:55  
**Analysed By** : EVR  
**Signed By** : EVR  
**Operator Group** : GRP1  
**Configuration** : CHNS

**Sample name** : M4A-006  
**Sample position #** : 17  
**Type** : Smp  
**Sample weight** : 1.576 (mg)  
**Calibration type** : K-Factor

### Instrument Parameters

| Carrier (kPa) | Purge (ml/min) | Oxygen (ml) | Delta P O2 (kPa) | Sampling Delay (s) | Run Time (s) | Front (°C) | Rear (°C) | Oven (°C) |
|---------------|----------------|-------------|------------------|--------------------|--------------|------------|-----------|-----------|
| 50            | 100            | 15          | 25               | 10                 | 660          | 1000       | Off       | 70        |

### Chromatogram

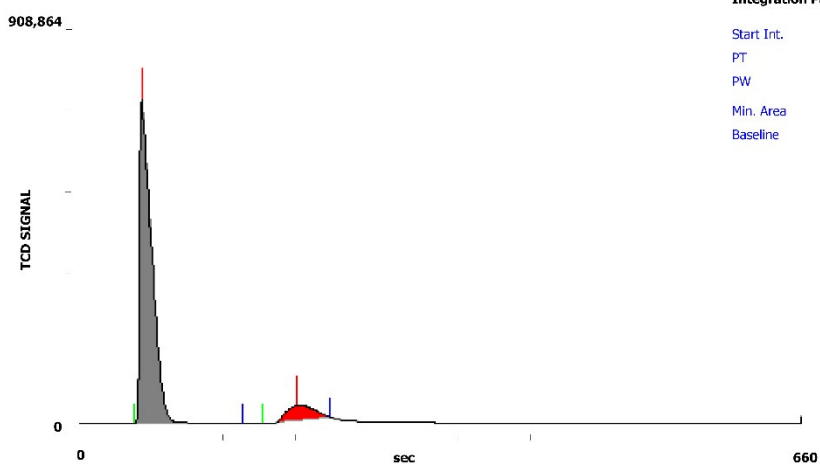

### Integration Parameters

|            |               |
|------------|---------------|
| Start Int. | 1             |
| PT         | 5             |
| PW         | 2             |
| Min. Area  | 100000        |
| Baseline   | Valley-Valley |

### Results

R

| Element  | RT (s) | Start (s) | End (s) | Area            | Area %                   | Element % |
|----------|--------|-----------|---------|-----------------|--------------------------|-----------|
| Nitroaen | -      | -         | -       | -               | -                        | -         |
| Carbon   | 58     | 51        | 150     | 8,234,425       | 90.723                   | 88.013    |
| Hydrogen | 198    | 167       | 229     | 841,981         | 9.277                    | 5.452     |
| Sulphur  | -      | -         | -       | -               | -                        | -         |
| Oxygen   | -      | -         | -       | -               | -                        | -         |
|          |        |           |         | <i>K-Factor</i> | <i>KFactor (Average)</i> |           |
| Nitrogen | -      | -         | -       | -               | 4.672328 E-07            |           |
| Carbon   | -      | -         | -       | -               | 1.684494 E-07            |           |
| Hydrogen | -      | -         | -       | -               | 1.020458 E-07            |           |
| Sulphur  | -      | -         | -       | -               | 3.863342 E-07            |           |
| Oxygen   | -      | -         | -       | -               | -                        |           |

05 Feb 2018 14:43:04 AutoRun: 180205- (800)

Figure S67. Elemental analysis of compound 8.

## EuroEA Elemental Analyser

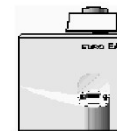

**AutoRun name** : 180212- (805)  
**Date of Analysis** : 12 Feb 2018  
**Time of Analysis** : 09:52:30  
**Analysed By** : EVR  
**Signed By** : EVR  
**Operator Group** : GRP1  
**Configuration** : CHNS

**Sample name** : M4A-008  
**Sample position #** : 11  
**Type** : Smp  
**Sample weight** : 1.569 (mg)  
**Calibration type** : K-Factor

### Instrument Parameters

| Carrier (kPa) | Purge (ml/min) | Oxygen (ml) | Delta P O2 (kPa) | Sampling Delay (s) | Run Time (s) | Front (°C) | Rear (°C) | Oven (°C) |
|---------------|----------------|-------------|------------------|--------------------|--------------|------------|-----------|-----------|
| 50            | 100            | 15          | 25               | 10                 | 660          | 1000       | Off       | 70        |

### Chromatogram

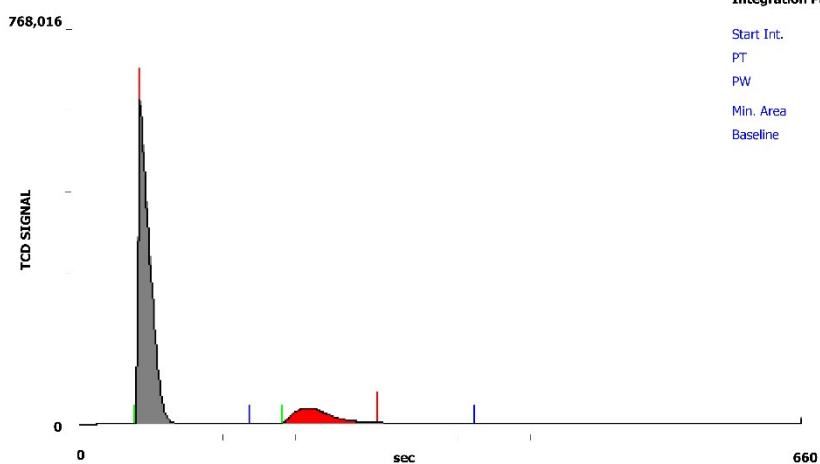

### Integration Parameters

|            |               |
|------------|---------------|
| Start Int. | 1             |
| PT         | 5             |
| PW         | 2             |
| Min. Area  | 100000        |
| Baseline   | Valley-Valley |

### Results

R

| Element  | RT (s)          | Start (s) | End (s) | Area                     | Area % | Element % |
|----------|-----------------|-----------|---------|--------------------------|--------|-----------|
| Nitroaen | -               | -         | -       | -                        | -      | -         |
| Carbon   | 56              | 51        | 155     | 8,918,703                | 85.245 | 93.209    |
| Hydrogen | 272             | 185       | 360     | 1,543,744                | 14.755 | 6.752     |
| Sulphur  | -               | -         | -       | -                        | -      | -         |
| Oxygen   | -               | -         | -       | -                        | -      | -         |
|          | <i>K-Factor</i> |           |         | <i>KFactor (Average)</i> |        |           |
| Nitrogen | -               | -         | -       | 4.612535 E-07            | -      | -         |
| Carbon   | -               | -         | -       | 1.639756 E-07            | -      | -         |
| Hydrogen | -               | -         | -       | 6.862405 E-08            | -      | -         |
| Sulphur  | -               | -         | -       | 4.040296 E-07            | -      | -         |
| Oxygen   | -               | -         | -       | -                        | -      | -         |

12 Feb 2018 14:10:04

AutoRun: 180212- (805)

Figure S68. Elemental analysis of compound 9.

## EuroEA Elemental Analyser



**AutoRun name** : 180205- (800)  
**Date of Analysis** : 05 Feb 2018  
**Time of Analysis** : 09:30:55  
**Analysed By** : EVR  
**Signed By** : EVR  
**Operator Group** : GRP1  
**Configuration** : CHNS

**Sample name** : M4A-009  
**Sample position #** : 15  
**Type** : Smp  
**Sample weight** : 1.886 (mg)  
**Calibration type** : K-Factor

### Instrument Parameters

| Carrier (kPa) | Purge (ml/min) | Oxygen (ml) | Delta P O2 (kPa) | Sampling Delay (s) | Run Time (s) | Front (°C) | Rear (°C) | Oven (°C) |
|---------------|----------------|-------------|------------------|--------------------|--------------|------------|-----------|-----------|
| 50            | 100            | 15          | 25               | 10                 | 660          | 1000       | Off       | 70        |

### Chromatogram

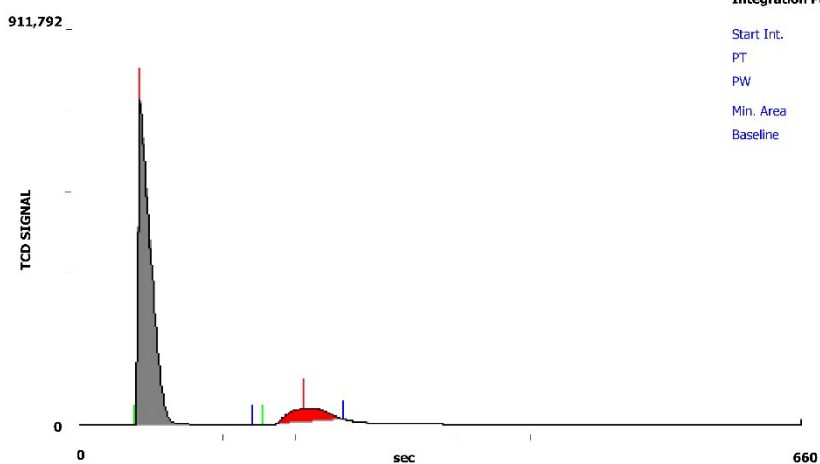

### Integration Parameters

|            |               |
|------------|---------------|
| Start Int. | 1             |
| PT         | 5             |
| PW         | 2             |
| Min. Area  | 100000        |
| Baseline   | Valley-Valley |

### Results

R

| Element  | RT (s) | Start (s) | End (s) | Area            | Area %                   | Element %     |
|----------|--------|-----------|---------|-----------------|--------------------------|---------------|
| Nitroaen | -      | -         | -       | -               | -                        | -             |
| Carbon   | 56     | 51        | 159     | 10,515,530      | 88.939                   | 93.920        |
| Hydrogen | 204    | 167       | 241     | 1,307,759       | 11.061                   | 6.043         |
| Sulphur  | -      | -         | -       | -               | -                        | -             |
| Oxygen   | -      | -         | -       | -               | -                        | -             |
|          |        |           |         | <i>K-Factor</i> | <i>KFactor (Average)</i> |               |
| Nitrogen | -      | -         | -       | -               | -                        | 4.672328 E-07 |
| Carbon   | -      | -         | -       | -               | -                        | 1.684494 E-07 |
| Hydrogen | -      | -         | -       | -               | -                        | 8.715154 E-08 |
| Sulphur  | -      | -         | -       | -               | -                        | 3.863342 E-07 |
| Oxygen   | -      | -         | -       | -               | -                        | -             |

05 Feb 2018 14:11:27

AutoRun: 180205- (800)

Figure S69. Elemental analysis of compound 1.

## EuroEA Elemental Analyser

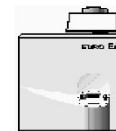

**AutoRun name** : 180321- (822)  
**Date of Analysis** : 21 Mar 2018  
**Time of Analysis** : 11:05:46  
**Analysed By** : EVR  
**Signed By** : EVR  
**Operator Group** : GRP1  
**Configuration** : CHNS

**Sample name** : M4-005  
**Sample position #** : 14  
**Type** : Smp  
**Sample weight** : 1.680 (mg)  
**Calibration type** : K-Factor

### Instrument Parameters

| Carrier (kPa) | Purge (ml/min) | Oxygen (ml) | Delta P O2 (kPa) | Sampling Delay (s) | Run Time (s) | Front (°C) | Rear (°C) | Oven (°C) |
|---------------|----------------|-------------|------------------|--------------------|--------------|------------|-----------|-----------|
| 50            | 100            | 15          | 25               | 10                 | 660          | 1000       | Off       | 70        |

### Chromatogram

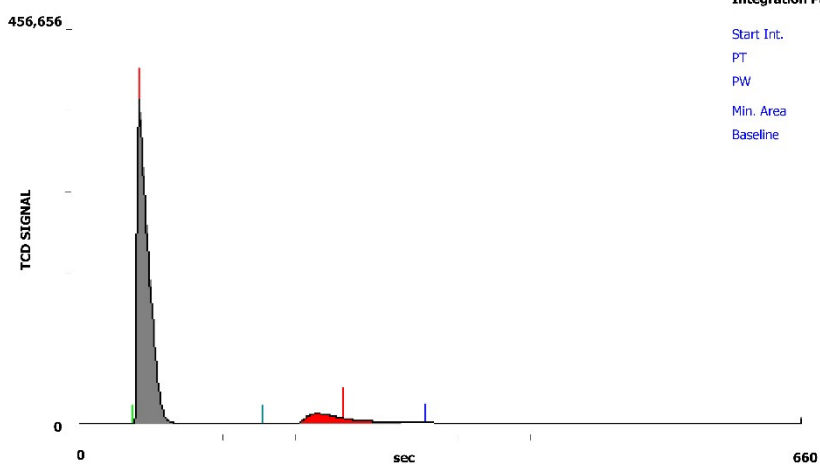

### Integration Parameters

|            |               |
|------------|---------------|
| Start Int. | 1             |
| PT         | 5             |
| PW         | 2             |
| Min. Area  | 100000        |
| Baseline   | Valley-Valley |

### Results

R

| Element  | RT (s) | Start (s) | End (s) | Area            | Area %                   | Element % |
|----------|--------|-----------|---------|-----------------|--------------------------|-----------|
| Nitroaen | -      | -         | -       | -               | -                        | -         |
| Carbon   | 55     | 50        | 167     | 8,821,664       | 89.970                   | 88.598    |
| Hydrogen | 241    | 167       | 315     | 983,457         | 10.030                   | 4.988     |
| Sulphur  | -      | -         | -       | -               | -                        | -         |
| Oxygen   | -      | -         | -       | -               | -                        | -         |
|          |        |           |         | <i>K-Factor</i> | <i>KFactor (Average)</i> |           |
| Nitrogen | -      | -         | -       | -               | 4.601519 E-07            |           |
| Carbon   | -      | -         | -       | -               | 1.687254 E-07            |           |
| Hydrogen | -      | -         | -       | -               | 8.520525 E-08            |           |
| Sulphur  | -      | -         | -       | -               | 3.956067 E-07            |           |
| Oxygen   | -      | -         | -       | -               | -                        |           |

22 Mar 2018 10:25:49

AutoRun: 180321- (822)

Figure S70. Elemental analysis of compound 13.



## EuroEA Elemental Analyser

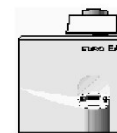

**AutoRun name** : 180212- (805)  
**Date of Analysis** : 12 Feb 2018  
**Time of Analysis** : 09:52:30  
**Analysed By** : EVR  
**Signed By** : EVR  
**Operator Group** : GRP1  
**Configuration** : CHNS

**Sample name** : M4-007  
**Sample position #** : 9  
**Type** : Smp  
**Sample weight** : 1.668 (mg)  
**Calibration type** : K-Factor

### Instrument Parameters

| Carrier (kPa) | Purge (ml/min) | Oxygen (ml) | Delta P O2 (kPa) | Sampling Delay (s) | Run Time (s) | Front (°C) | Rear (°C) | Oven (°C) |
|---------------|----------------|-------------|------------------|--------------------|--------------|------------|-----------|-----------|
| 50            | 100            | 15          | 25               | 10                 | 660          | 1000       | Off       | 70        |

### Chromatogram

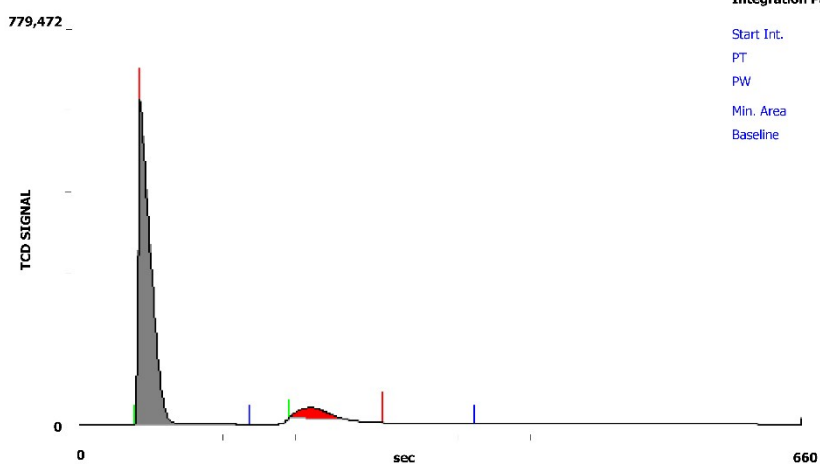

### Integration Parameters

|            |               |
|------------|---------------|
| Start Int. | 1             |
| PT         | 5             |
| PW         | 2             |
| Min. Area  | 100000        |
| Baseline   | Valley-Valley |

### Results

R

| Element  | RT (s)          | Start (s) | End (s) | Area                     | Area % | Element % |
|----------|-----------------|-----------|---------|--------------------------|--------|-----------|
| Nitroaen | -               | -         | -       | -                        | -      | -         |
| Carbon   | 56              | 51        | 156     | 9,509,078                | 92.454 | 93.481    |
| Hydrogen | 276             | 192       | 360     | 776,173                  | 7.546  | 6.464     |
| Sulphur  | -               | -         | -       | -                        | -      | -         |
| Oxygen   | -               | -         | -       | -                        | -      | -         |
|          | <i>K-Factor</i> |           |         | <i>KFactor (Average)</i> |        |           |
| Nitrogen | -               | -         | -       | 4.612535 E-07            | -      | -         |
| Carbon   | -               | -         | -       | 1.639756 E-07            | -      | -         |
| Hydrogen | -               | -         | -       | 1.389080 E-07            | -      | -         |
| Sulphur  | -               | -         | -       | 4.040296 E-07            | -      | -         |
| Oxygen   | -               | -         | -       | -                        | -      | -         |

12 Feb 2018 13:37:40

AutoRun: 180212- (805)

Figure S71. Elemental analysis of compound 14.

## EuroEA Elemental Analyser



**AutoRun name** : 180212- (805)  
**Date of Analysis** : 12 Feb 2018  
**Time of Analysis** : 09:52:30  
**Analysed By** : EVR  
**Signed By** : EVR  
**Operator Group** : GRP1  
**Configuration** : CHNS

**Sample name** : M4-008  
**Sample position #** : 7  
**Type** : Smp  
**Sample weight** : 1.729 (mg)  
**Calibration type** : K-Factor

### Instrument Parameters

| Carrier (kPa) | Purge (ml/min) | Oxygen (ml) | Delta P O2 (kPa) | Sampling Delay (s) | Run Time (s) | Front (°C) | Rear (°C) | Oven (°C) |
|---------------|----------------|-------------|------------------|--------------------|--------------|------------|-----------|-----------|
| 50            | 100            | 15          | 25               | 10                 | 660          | 1000       | Off       | 70        |

### Chromatogram

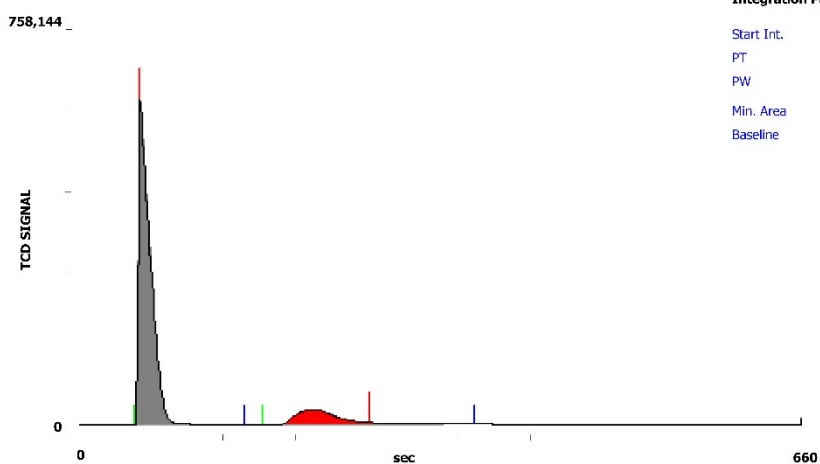

### Integration Parameters

|            |               |
|------------|---------------|
| Start Int. | 1             |
| PT         | 5             |
| PW         | 2             |
| Min. Area  | 100000        |
| Baseline   | Valley-Valley |

### Results

R

| Element  | RT (s) | Start (s) | End (s) | Area            | Area %                   | Element % |
|----------|--------|-----------|---------|-----------------|--------------------------|-----------|
| Nitroaen | -      | -         | -       | -               | -                        | -         |
| Carbon   | 56     | 51        | 151     | 9,873,429       | 85.214                   | 93.638    |
| Hydrogen | 264    | 167       | 360     | 1,713,175       | 14.786                   | 6.323     |
| Sulphur  | -      | -         | -       | -               | -                        | -         |
| Oxygen   | -      | -         | -       | -               | -                        | -         |
|          |        |           |         | <i>K-Factor</i> | <i>KFactor (Average)</i> |           |
| Nitrogen | -      | -         | -       | -               | 4.612535 E-07            |           |
| Carbon   | -      | -         | -       | -               | 1.639756 E-07            |           |
| Hydrogen | -      | -         | -       | -               | 6.381622 E-08            |           |
| Sulphur  | -      | -         | -       | -               | 4.040296 E-07            |           |
| Oxygen   | -      | -         | -       | -               | -                        |           |

12 Feb 2018 13:02:01 AutoRun: 180212- (805)

Figure S72. Elemental analysis of compound 2.

## 12. References

- [1] Liu, J.; Li, B.-W.; Tan, Y.-Z.; Giannakopoulos, A.; Sanchez-Sanchez, C.; Beljonne, D.; Ruffieux, P.; Fasel, R.; Feng, X.; Müllen, K., *J. Am. Chem. Soc.* **2015**, *137*, 6097.
- [2] Xie, Z.; Yang, B.; Liu, L.; Li, M.; Lin, D.; Ma, Y.; Cheng, G.; Liu, S., *J. Phys. Org. Chem.* **2005**, *18*, 962.
- [3] Bonifacio, M. C.; Robertson, C. R.; Jung, J.-Y.; King, B. T., *J. Org. Chem.* **2005**, *70*, 8522.
- [4] Gaussian 09, Revision D.01, Frisch, M. J.; Trucks, G. W.; Schlegel, H. B.; Scuseria, G. E.; Robb, M. A.; Cheeseman, J. R.; Scalmani, G.; Barone, V.; Mennucci, B.; Petersson, G. A.; Nakatsuji, H.; Caricato, M.; Li, X.; Hratchian, H. P.; Izmaylov, A. F.; Bloino, J.; Zheng, G.; Sonnenberg, J. L.; Hada, M.; Ehara, M.; Toyota, K.; Fukuda, R.; Hasegawa, J.; Ishida, M.; Nakajima, T.; Honda, Y.; Kitao, O.; Nakai, H.; Vreven, T.; Montgomery, Jr., J. A.; Peralta, J. E.; Ogliaro, F.; Bearpark, M.; Heyd, J. J.; Brothers, E.; Kudin, K. N.; Staroverov, V. N.; Kobayashi, R.; Normand, J.; Raghavachari, K.; Rendell, A.; Burant, J. C.; Iyengar, S. S.; Tomasi, J.; Cossi, M.; Rega, N.; Millam, N. J.; Klene, M.; Knox, J. E.; Cross, J. B.; Bakken, V.; Adamo, C.; Jaramillo, J.; Gomperts, R.; Stratmann, R. E.; Yazyev, O.; Austin, A. J.; Cammi, R.; Pomelli, C.; Ochterski, J. W.; Martin, R. L.; Morokuma, K.; Zakrzewski, V. G.; Voth, G. A.; Salvador, P.; Dannenberg, J. J.; Dapprich, S.; Daniels, A. D.; Farkas, Ö.; Foresman, J. B.; Ortiz, J. V.; Cioslowski, J.; Fox, D. J. Gaussian, Inc., Wallingford CT, **2009**.
- [5] (a) Yanai, T.; Tew, D.; Handy, N, *Chem. Phys. Lett.* **2004**, *393*, 51. (b) Krishnan, R.; Binkley, J. S.; Seeger, R.; Pople, J. A., *J. Chem. Phys.* **1980**, *72*, 650.
- [6] (a) Ditchfield R. *Mol. Phys.* 1974, **27**, 789. (b) Wolinski K.; Hinton J. F.; Pulay P. *J. Am. Chem. Soc.* **1990**, *112*, 8251.
- [7] (a) Hegarty, D.; Robb, M. A.; *Mol. Phys.* **1979**, *38*, 1795. (b) Eade, R. H. A.; Robb, M. A. *Chem. Phys. Lett.* **1981**, *83*, 362. (c) Schlegel, H. B.; Robb, M. A. *Chem. Phys. Lett.* **1982**, *93*, 43. (d) Bernardi, F.; Bottini, A.; McDougali, J. J. W.; Robb, M. A.; Schlegel, H. B. *Far. Symp. Chem. Soc.* **1984**, *19*, 137. (e) Frisch, M. J.; Ragazos, I. N.; Robb, M. A.; Schlegel, H. B. *Chem. Phys. Lett.* **1992**, *189*, 524. (f) Yamamoto, N.; Vreven, T.; Robb, M. A.; Frisch, M. J.; Schlegel, H. B. *Chem. Phys. Lett.* **1996**, *250*, 373. (g) Head-Gordon, M. *Chem. Phys. Lett.* **2003**, *372*, 508. (h) Kolde, T.; Futukawa, K.; Shinokubo, H.; Shin, J.-Y.; Kim, K. S.; Kim, D.; Osuka, A. *J. Am. Chem. Soc.* **2012**, *132*, 7246.
- [8] Geuenich, D.; Hess, K.; Köhler, F.; Herges, R. *Chem. Rev.* **2005**, *105*, 3758.
- [9] Chase, D. T.; Rose, B. D.; McClintock, S. P.; Zakharov, L. N.; Haley, M. M. *Angew. Chem. Int. Ed.* **2011**, *50*, 1127.
- [10] Shimizu, A.; Kishi, R.; Nakano, M.; Shiomi, D.; Sato, K.; Takui, T.; Hisaki, I.; Miyata, M.; Tobe, Y. *Angew. Chem. Int. Ed.* **2013**, *52*, 6076.
- [11] Ochterski, J. W. "Thermochemistry in Gaussian", can be found under <http://gaussian.com/thermo/>, **2000**.
